# Supplementary material for: Core outcome set for early intervention trials to prevent obesity in childhood (COS-EPOCH): Agreement on “what” to measure
Source: PubMed Central journal article supplement (PMC9492532; doi:10.1038/s41366-022-01198-w), 2022-08-04
Supplement: 41366_2022_1198_MOESM1_ESM.pdf [file 41366_2022_1198_MOESM1_ESM.pdf]

## **Core Outcome Sets for Early intervention trials to Prevent Obesity in Childhood (COS-EPOCH):**

### **Agreement on “what” to measure**

Vicki Brown <sup>1,2</sup>, Marj Moodie <sup>1,2</sup>, Marufa Sultana <sup>1</sup>, Kylie E Hunter <sup>2,3</sup>, Rebecca Byrne <sup>2,4</sup>, Anna Lene Seidler <sup>2,3</sup>, Rebecca Golley <sup>2,5</sup>, Rachael W Taylor <sup>2,6</sup>, Kylie D Hesketh <sup>2,7</sup>, Karen Matvienko-Sikar <sup>8</sup>

- 1 Deakin University, Geelong, Deakin Health Economics, Institute for Health Transformation, Global Obesity Centre (GLOBE), School of Health and Social Development, Victoria 3220, Australia
- 2 Centre for Research Excellence in the Early Prevention of Obesity in Childhood, University of Sydney, Sydney NSW, Australia
- 3 NHMRC Clinical Trials Centre, University of Sydney, Sydney NSW, Australia
- 4 Queensland University of Technology, School of Exercise and Nutrition Sciences
- 5 Caring Futures Institute, College of Nursing and Health Sciences, Flinders University, SA 5042, Australia
- 6 Department of Medicine, University of Otago, Dunedin, New Zealand
- 7 Deakin University, Geelong Victoria 3220, Institute for Physical Activity and Nutrition
- 8 School of Public Health, University College Cork, Ireland

Corresponding author: Dr Vicki Brown, Deakin University, Geelong, Deakin Health Economics, Institute for Health Transformation, Global Obesity Centre (GLOBE), School of Health and Social Development, Victoria 3220, Australia. [victoria.brown@deakin.edu.au](mailto:victoria.brown@deakin.edu.au)

**List of Tables**

Supplementary Table S1- Core Outcome Set-STAndards for Reporting (1) ..... 3

Supplementary Table S2- Recommendations for the Conducting and Reporting of Delphi Studies (CREDES)(2) ..... 5

Supplementary Table S3- Outcomes included in the e-Delphi survey, by round ..... 7

Supplementary Table S4- Summary results by stakeholder group and eDelphi round..... 18

Supplementary Table S5 - Percentage of stakeholders who scored the outcome as critical (score of 7–9) for inclusion, Round 3 ..... 97

**List of Figures**

Supplementary Figure S1 – Example of graphical feedback given to participants between rounds . 102

Supplementary Figure S2 - Distribution of scores across all outcomes..... 103

**Supplementary Table S1- Core Outcome Set-STAndards for Reporting (1)**

| Section/topic             | Item No. | Checklist item                                                                                                                                                                                                   | Manuscript page |
|---------------------------|----------|------------------------------------------------------------------------------------------------------------------------------------------------------------------------------------------------------------------|-----------------|
| <b>Title/abstract</b>     |          |                                                                                                                                                                                                                  |                 |
| Title                     | 1a       | Identify in the title that the paper reports the development of a COS.                                                                                                                                           | 1,3             |
| Abstract                  | 1b       | Provide a structured summary.                                                                                                                                                                                    | 1               |
| <b>Introduction</b>       |          |                                                                                                                                                                                                                  |                 |
| Background and objectives | 2a       | Describe the background and explain the rationale for developing the COS.                                                                                                                                        | 3               |
|                           | 2b       | Describe the specific objectives with reference to developing a COS.                                                                                                                                             | 4               |
| Scope                     | 3a       | Describe the health condition(s) and population(s) covered by the COS.                                                                                                                                           | 4               |
|                           | 3b       | Describe the intervention(s) covered by the COS.                                                                                                                                                                 | 4               |
|                           | 3c       | Describe the setting(s) in which the COS is to be applied.                                                                                                                                                       | 4               |
| <b>Methods</b>            |          |                                                                                                                                                                                                                  |                 |
| Protocol/Registry entry   | 4        | Indicate where the COS development protocol can be accessed, if available, and/or the study registration details.                                                                                                | 4               |
| Participants              | 5        | Describe the rationale for stakeholder groups involved in the COS development process, eligibility criteria for participants from each group, and a description of how the individuals involved were identified. | 5               |
| Information sources       | 6a       | Describe the information sources used to identify an initial list of outcomes.                                                                                                                                   | 5               |
|                           | 6b       | Describe how outcomes were dropped/combined, with reasons (if applicable).                                                                                                                                       | 6               |
| Consensus process         | 7        | Describe how the consensus process was undertaken.                                                                                                                                                               | 6               |
| Outcome scoring           | 8        | Describe how outcomes were scored and how scores were summarised.                                                                                                                                                | 8               |
| Consensus definition      | 9a       | Describe the consensus definition.                                                                                                                                                                               | 9               |
|                           | 9b       | Describe the procedure for determining how outcomes were included or excluded from consideration during the consensus process.                                                                                   | 9, 10           |

|                          |     |                                                                                                                                   |                   |
|--------------------------|-----|-----------------------------------------------------------------------------------------------------------------------------------|-------------------|
| Ethics and consent       | 10  | Provide a statement regarding the ethics and consent issues for the study.                                                        | 5                 |
| <b>Results</b>           |     |                                                                                                                                   |                   |
| Protocol deviations      | 11  | Describe any changes from the protocol (if applicable), with reasons, and describe what impact these changes have on the results. | n/a               |
| Participants             | 12  | Present data on the number and relevant characteristics of the people involved at all stages of COS development.                  | 11, 12, 13        |
| Outcomes                 | 13a | List all outcomes considered at the start of the consensus process.                                                               | Supp Table S3     |
|                          | 13b | Describe any new outcomes introduced and any outcomes dropped, with reasons, during the consensus process.                        | 12, Supp Table S3 |
| COS                      | 14  | List the outcomes in the final COS.                                                                                               | 13                |
| <b>Discussion</b>        |     |                                                                                                                                   |                   |
| Limitations              | 15  | Discuss any limitations in the COS development process.                                                                           | 15                |
| Conclusions              | 16  | Provide an interpretation of the final COS in the context of other evidence, and implications for future research.                | 14,15,16          |
| <b>Other information</b> |     |                                                                                                                                   |                   |
| Funding                  | 17  | Describe sources of funding/role of funders.                                                                                      | 18                |
| Conflicts of interest    | 18  | Describe any conflicts of interest within the study team and how these were managed.                                              | 18                |

**Supplementary Table S2- Recommendations for the Conducting and Reporting of Delphi Studies (CREDES)(2)**

| Item no.                                         | Recommendation                                                                                                                                                                                                                                                                                                                                                                                                                                   | Manuscript page |
|--------------------------------------------------|--------------------------------------------------------------------------------------------------------------------------------------------------------------------------------------------------------------------------------------------------------------------------------------------------------------------------------------------------------------------------------------------------------------------------------------------------|-----------------|
| Rationale for the choice of the Delphi technique |                                                                                                                                                                                                                                                                                                                                                                                                                                                  |                 |
| 1                                                | Justification. The choice of the Delphi technique as a method of systematically collating expert consultation and building consensus needs to be well justified. When selecting the method to answer a particular research question, it is important to keep in mind its constructivist nature                                                                                                                                                   | 4, 6            |
| Planning and design                              |                                                                                                                                                                                                                                                                                                                                                                                                                                                  |                 |
| 2                                                | Planning and process. The Delphi technique is a flexible method and can be adjusted to the respective research aims and purposes. Any modifications should be justified by a rationale and be applied systematically and rigorously.                                                                                                                                                                                                             | 6-9             |
| 3                                                | Definition of consensus. Unless not reasonable due to the explorative nature of the study, an a priori criterion for consensus should be defined. This includes a clear and transparent guide for action on (a) how to proceed with certain items or topics in the next survey round, (b) the required threshold to terminate the Delphi process and (c) procedures to be followed when consensus is (not) reached after one or more iterations. | 9               |
| Study conduct                                    |                                                                                                                                                                                                                                                                                                                                                                                                                                                  |                 |
| 4                                                | Informational input. All material provided to the expert panel at the outset of the project and throughout the Delphi process should be carefully reviewed and piloted in advance in order to examine the effect on experts' judgements and to prevent bias.                                                                                                                                                                                     | 6-9             |
| 5                                                | Prevention of bias. Researchers need to take measures to avoid directly or indirectly influencing the experts' judgements. If one or more members of the research team have a conflict of interest, entrusting an independent researcher with the main coordination of the Delphi study is advisable.                                                                                                                                            | 6-9             |
| 6                                                | Interpretation and processing of results. Consensus does not necessarily imply the 'correct' answer or judgement; (non)consensus and stable disagreement provide informative insights and highlight differences in perspectives concerning the topic in question.                                                                                                                                                                                | 6-9             |
| 7                                                | External validation. It is recommended to have the final draft of the resulting guidance on best practice reviewed and approved by an external board or authority before publication and dissemination.                                                                                                                                                                                                                                          | 5, 6-9          |
| Reporting                                        |                                                                                                                                                                                                                                                                                                                                                                                                                                                  |                 |
| 8                                                | Purpose and rationale. The purpose of the study should be clearly defined and demonstrate the appropriateness of the use of the Delphi technique as a method to achieve the research aim. A rationale for the choice of the Delphi technique as the most suitable method needs to be provided.                                                                                                                                                   | 4, 6-9          |

|    |                                                                                                                                                                                                                                                                                                                                                                                                                                                                                                                                                                                                                                                                                                                                                                                                                                                                                   |                      |
|----|-----------------------------------------------------------------------------------------------------------------------------------------------------------------------------------------------------------------------------------------------------------------------------------------------------------------------------------------------------------------------------------------------------------------------------------------------------------------------------------------------------------------------------------------------------------------------------------------------------------------------------------------------------------------------------------------------------------------------------------------------------------------------------------------------------------------------------------------------------------------------------------|----------------------|
| 9  | Expert panel. Criteria for the selection of experts and transparent information on recruitment of the expert panel, sociodemographic details including information on expertise regarding the topic in question, (non)response and response rates over the ongoing iterations should be reported                                                                                                                                                                                                                                                                                                                                                                                                                                                                                                                                                                                  | 6-9, 11-13, Table 2  |
| 10 | Description of the methods. The methods employed need to be comprehensible; this includes information on preparatory steps (How was available evidence on the topic in question synthesised?), piloting of material and survey instruments, design of the survey instrument(s), the number and design of survey rounds, methods of data analysis, processing and synthesis of experts' responses to inform the subsequent survey round and methodological decisions taken by the research team throughout the process.                                                                                                                                                                                                                                                                                                                                                            | 6-9                  |
| 11 | Procedure. Flow chart to illustrate the stages of the Delphi process, including a preparatory phase, the actual 'Delphi rounds', interim steps of data processing and analysis, and concluding steps.                                                                                                                                                                                                                                                                                                                                                                                                                                                                                                                                                                                                                                                                             | 11, Figure 1         |
| 12 | Definition and attainment of consensus. It needs to be comprehensible to the reader how consensus was achieved throughout the process, including strategies to deal with non-consensus.                                                                                                                                                                                                                                                                                                                                                                                                                                                                                                                                                                                                                                                                                           | Table 1              |
| 13 | Results. Reporting of results for each round separately is highly advisable in order to make the evolving of consensus over the rounds transparent. This includes figures showing the average group response, changes between rounds, as well as any modifications of the survey instrument such as deletion, addition or modification of survey items based on previous rounds.                                                                                                                                                                                                                                                                                                                                                                                                                                                                                                  | 11-13, Supp Table S4 |
| 14 | Discussion of limitations. Reporting should include a critical reflection of potential limitations and their impact of the resulting guidance.                                                                                                                                                                                                                                                                                                                                                                                                                                                                                                                                                                                                                                                                                                                                    | 15                   |
| 15 | Adequacy of conclusions. The conclusions should adequately reflect the outcomes of the Delphi study with a view to the scope and applicability of the resulting practice guidance.                                                                                                                                                                                                                                                                                                                                                                                                                                                                                                                                                                                                                                                                                                | 14-17                |
| 16 | Publication and dissemination. The resulting guidance on good practice in palliative care should be clearly identifiable from the publication, including recommendations for transfer into practice and implementation. If the publication does not allow for a detailed presentation of either the resulting practice guidance or the methodological features of the applied Delphi technique, or both, reference to a more detailed presentation elsewhere should be made (e.g. availability of the full guideline from the authors or online; publication of a separate paper reporting on methodological details and particularities of the process (e.g. persistent disagreement and controversy on certain issues)). A dissemination plan should include endorsement of the guidance by professional associations and health care authorities to facilitate implementation. | 14-17                |

**Supplementary Table S3- Outcomes included in the e-Delphi survey, by round**

| <b>Outcome domain</b> | <b>Outcome</b>                                            | <b>Definition</b>                                                                                                                                                                                                                     | <b>Round/s</b> |
|-----------------------|-----------------------------------------------------------|---------------------------------------------------------------------------------------------------------------------------------------------------------------------------------------------------------------------------------------|----------------|
| Anthropometry         | Child weight-based anthropometry                          | Includes child height, weight, body mass index (BMI), BMI z-score, percentile, prevalence of overweight and obesity, weight for height or length.                                                                                     | 1,2,3          |
|                       | Child body composition                                    | Proportion of fat, muscle, bone and water. Includes child lean body mass, body fat, percent body fat, fat free mass, abdominal fat, skinfolds.                                                                                        | 1,2,3          |
|                       | Child circumference                                       | Includes child waist circumference, waist to height/length, arm circumference, head shape or circumference.                                                                                                                           | 1,2,3          |
| Sedentary behaviour   | Child screen time                                         | Includes time spent by the child watching DVDs, TV, videos or using computers, tablets, smart phones or other portable electronic devices.                                                                                            | 1,2,3          |
|                       | Sedentary behaviour or physical activity home environment | Includes measures of the home environment that may influence sedentary behaviour or physical activity, including fixed and non-fixed home and yard features. For example, size of backyard, presence of playground or play equipment. | 1,2,3          |
|                       | Child time spent sedentary                                | Includes time spent by the child sitting, lying awake, immobile but awake, or with no trunk movement. Includes time spent in restricted movement (e.g. in a carseat or a stroller). Does not include time asleep or screen time.      | 1,2,3          |
| Physical activity     | Child active transport                                    | Includes frequency, duration, use of active transport by the child (e.g. walking, cycling, public transport or scooting).                                                                                                             | 1,2,3          |
|                       | Child physical fitness                                    | Includes measures of child physical fitness, including shuttle run tests, handgrip strength tests, standing long jump tests, one-leg stance tests.                                                                                    | 1,2,3          |
|                       | Child active indoor play                                  | Includes frequency or time spent by the child in active indoor play, playing indoors, indoor play in a playful context combined with activity that is above resting metabolic rate.                                                   | 1,2,3          |

|       |                                                  |                                                                                                                                                                                                                                                                                                                                                                                                                                                                                                                                                                                   |       |
|-------|--------------------------------------------------|-----------------------------------------------------------------------------------------------------------------------------------------------------------------------------------------------------------------------------------------------------------------------------------------------------------------------------------------------------------------------------------------------------------------------------------------------------------------------------------------------------------------------------------------------------------------------------------|-------|
|       | Child active outdoor play                        | Includes frequency or time spent outdoors by the child, playing outdoors, in active outdoor play or outdoor play in a playful context combined with activity that is above resting metabolic rate.                                                                                                                                                                                                                                                                                                                                                                                | 1,2,3 |
|       | Child physical activity                          | Includes frequency or time spent by the child in physical activity, including total physical activity, moderate-to-vigorous physical activity, leisure physical activity, walking, crawling. Includes organised physical activity (e.g. frequency or time spent by the child at sport, dance, swimming) and unorganised physical activity (e.g. frequency of time spent by the child in energetic play, play, active play, running, jumping, climbing, structured free play or common play activities, frequency or time spent by the child at the park, playground, excursions). | 1,2,3 |
|       | Infant tummy time                                | Includes commencement age, frequency, time spent by the infant in tummy time.                                                                                                                                                                                                                                                                                                                                                                                                                                                                                                     | 1,2,3 |
|       | Infant floor based play time                     | Includes time spent by the infant playing on the floor, unconfined or unrestrained.                                                                                                                                                                                                                                                                                                                                                                                                                                                                                               | 1,2,3 |
|       | Child enjoyment of physical activity and playing | Includes child's enjoyment of playing with parents, child's enjoyment of physical activity (movement, play), child's enjoyment of playing with objects and toys.                                                                                                                                                                                                                                                                                                                                                                                                                  | 1,2,3 |
| Sleep | Child sleep duration                             | Includes child sleep quantity, hours of total daily sleep duration, total minutes of sleep in 24-hour period, the average length of a sleep bout and duration of individual sleep bouts, average night time sleep, sleep hours per night, sleep consecutive hours at night, rate of sleeping through the night. Can be used to derive child awake time.                                                                                                                                                                                                                           | 1,2,3 |
|       | Child sleep disturbance or problems              | Includes difficulty sleeping, difficulty falling asleep in own bed, sleep reluctance, disturbances in the amount or quality of sleep, night wakings of the child.                                                                                                                                                                                                                                                                                                                                                                                                                 | 1,2,3 |
|       | Child sleep efficiency                           | The percentage of total time the child spends in bed actually spent in sleep.                                                                                                                                                                                                                                                                                                                                                                                                                                                                                                     | 1,2,3 |
|       | Child sleep latency                              | The time it takes the child to fall asleep.                                                                                                                                                                                                                                                                                                                                                                                                                                                                                                                                       | 1,2,3 |



|                |                                            |                                                                                                                                                                                                                                                                                                                                                                                                                      |       |
|----------------|--------------------------------------------|----------------------------------------------------------------------------------------------------------------------------------------------------------------------------------------------------------------------------------------------------------------------------------------------------------------------------------------------------------------------------------------------------------------------|-------|
|                | Child sleep patterns or timing             | Includes napping or sleep patterns, timing of sleeps of the child.                                                                                                                                                                                                                                                                                                                                                   | 1,2,3 |
|                | Child sleep quality                        | Quality of sleep of the child.                                                                                                                                                                                                                                                                                                                                                                                       | 1,2,3 |
| Dietary intake | Child carbohydrate intake or glycemic load | Includes quantity or frequency of carbohydrate intake by the child, glycemic load of the child (rates carbohydrates according to how quickly they raise blood glucose).                                                                                                                                                                                                                                              | 1,2,3 |
|                | Child dairy intake                         | Includes quantity or frequency of dairy intake by the child. Also includes child's requests for calcium, dairy or milk products.                                                                                                                                                                                                                                                                                     | 1,2,3 |
|                | Child diet quality                         | Includes child's diet quality in relation to the proportion of less healthy foods in relation to overall energy intake, the proportion of healthy foods in relation to overall energy intake, the intake of nutrients compared to dietary guideline recommendations, the intake of a healthy dietary pattern, the change in healthy meals consumed; child healthy eating index score or child nutrition risk scores. | 1,2,3 |
|                | Child dietary intake                       | Includes quantity or frequency of child's general dietary intake.                                                                                                                                                                                                                                                                                                                                                    | 1,2,3 |
|                | Child fat intake                           | Includes quantity or frequency of child's fat intake.                                                                                                                                                                                                                                                                                                                                                                | 1,2,3 |
|                | Child fibre intake                         | Includes quantity or frequency of child's fibre intake.                                                                                                                                                                                                                                                                                                                                                              | 1,2,3 |
|                | Child fruit and vegetable intake           | Includes quantity or frequency of child's consumption of fruits and/or vegetables.                                                                                                                                                                                                                                                                                                                                   | 1,2,3 |
|                | Child grains, breads, cereals intake       | Includes quantity or frequency of child's consumption of cereals, bread, pasta, rice, porridge, whole grains.                                                                                                                                                                                                                                                                                                        | 1,2,3 |
|                | Child meat, poultry, fish intake           | Includes quantity or frequency of child's consumption of meat, poultry, fish.                                                                                                                                                                                                                                                                                                                                        | 1,2,3 |
|                | Child non-core food intake                 | Includes quantity or frequency of child's consumption of processed snack foods, energy dense sweets (e.g. chocolate bars, ice cream), high caloric foods, savoury snacks, discretionary calories, french fries, fast or deep-fried foods.                                                                                                                                                                            | 1,2,3 |

|                                |                                                 |                                                                                                                                                              |       |
|--------------------------------|-------------------------------------------------|--------------------------------------------------------------------------------------------------------------------------------------------------------------|-------|
|                                | Child non-core beverages intake                 | Includes quantity or frequency of consumption of sodas, soft drinks, sugar-sweetened beverages, juices, cordials, high caloric drinks by the child.          | 1,2,3 |
|                                | Child out of home foods intake                  | Includes quantity or frequency of child's consumption of meals not prepared in the home, commercially prepared meals, fast foods, eating in restaurants.     | 1,2,3 |
|                                | Child protein intake                            | Includes quantity or frequency of child's protein intake.                                                                                                    | 1,2,3 |
|                                | Child sodium intake                             | Includes quantity or frequency of child's sodium intake.                                                                                                     | 1,2,3 |
|                                | Child total and added sugars intake             | Includes quantity or frequency of child's consumption of total and added sugars, foods with added sugars.                                                    | 1,2,3 |
|                                | Child desire for drinks                         | Includes child's desire or requests for drinks.                                                                                                              | 1,2,3 |
|                                | Child eating in response to emotion             | Child eating more or less, in response to emotional state, emotional undereating, emotional overeating.                                                      | 1,2,3 |
|                                | Child enjoyment of food                         | Includes child's response to the food, enjoyment of food.                                                                                                    | 1,2,3 |
|                                | Child meal patterns                             | Includes child meal times and snack patterns, number of meals per day.                                                                                       | 1,2,3 |
|                                | Child food neophobia                            | Includes child reluctance to eat, selectivity about the range of foods accepted or the avoidance or unwillingness to eat new foods.                          | 1,2,3 |
|                                | Child satiety responsiveness                    | Includes child feeding self-regulation, stopping eating when full.                                                                                           | 1,2,3 |
|                                | Child slowness in eating                        | Child dawdling over meals, eating slowly.                                                                                                                    | 1,2,3 |
| Outcomes in parents/caregivers | Parent/caregiver weight based anthropometry     | Includes parent/caregiver height, weight, body mass index (BMI), BMI z-score, percentile, prevalence of overweight and obesity, weight for height or length. | 1,2,3 |
|                                | Parent/caregiver screen time parenting practice | Includes rules around screen time in the home or early education and care settings. Includes parents' use of TV viewing as a form of family recreation,      | 1,2,3 |

|  |                                                         |                                                                                                                                                    |       |
|--|---------------------------------------------------------|----------------------------------------------------------------------------------------------------------------------------------------------------|-------|
|  |                                                         | frequency of TV viewing during mealtimes, presence and availability of TV and media devices, total time TV is on when no one is watching.          |       |
|  | Parent/caregiver role modelling of sedentary behaviours | Includes frequency, time spent by the parent/caregiver in sedentary activities, such as watching TV, sitting, lying still.                         | 1,2,3 |
|  | Parent/caregiver role modelling of physical activity    | Includes frequency or time spent by the parent/caregiver in physical activity, or work-related physical activities.                                | 1,2,3 |
|  | Parent/caregiver role modelling of healthy eating       | Parent/caregiver role modelling of healthy eating (e.g. eating a wide variety of fruits and vegetables, minimising discretionary food intake)      | 1,2,3 |
|  | Parent/caregiver encouragement of physical activity     | Includes encouragement of physical activity by parent/caregiver, support for physical activity.                                                    | 1,2,3 |
|  | Parent/caregiver co-participation in physical activity  | Includes engagement of parent/caregiver in physical activity or physically active play with child.                                                 | 1,2,3 |
|  | Parent/caregiver physical activity parenting practice   | Includes parent/caregiver rules and practices, intentions or habit strength for activity behaviours.                                               | 1,2,3 |
|  | Parent/caregiver sleep parenting practice               | Includes general sleep parent/caregiver practices, bedtime or sleep routine, assistance to sleep by touching, intervening when awake in the night. | 1,2,3 |
|  | Parent/caregiver daytime dysfunction or fatigue         | Parent/caregiver difficulty in carrying out tasks due to tiredness or sleepiness. Parent/caregiver feeling of extreme or constant tiredness.       | 1,2,3 |
|  | Parent/caregiver nutrition parenting practices          | Includes parent/caregiver rules about nutrition, trying new foods, habit strength for new feeding behaviours.                                      | 1,2,3 |
|  | Parent/caregiver's dietary intentions                   | Includes parent/caregiver's readiness or intention to eat more fruit and vegetables, habit strength for dietary behaviours.                        | 1,2,3 |
|  | Parent/caregiver food variety                           | Includes variation in types of foods offered by the parent/caregiver.                                                                              | 1,2,3 |

|                                                |                                                                                                                                                                                                                         |       |
|------------------------------------------------|-------------------------------------------------------------------------------------------------------------------------------------------------------------------------------------------------------------------------|-------|
| Parent/caregiver anxiety symptoms              | Parent/caregiver symptoms of anxiety.                                                                                                                                                                                   | 1,2,3 |
| Parent/caregiver concerns about child's weight | Parent/caregiver concerns about child's weight.                                                                                                                                                                         | 1,2,3 |
| Parent/caregiver depression symptoms           | Parent/caregiver symptoms of depression.                                                                                                                                                                                | 1,2,3 |
| Parent/caregiver self-efficacy                 | Includes parent/caregiver self-efficiency, self-efficacy, confidence, self-agency for promoting healthy behaviours.                                                                                                     | 1,2,3 |
| Parent/caregiver social support                | Includes parent/caregiver support, partner and family support.                                                                                                                                                          | 1,2,3 |
| Parent/caregiver stress                        | Parent/caregiver feeling of emotional tension.                                                                                                                                                                          | 1,2,3 |
| Parent/caregiver attitudes                     | Parent/caregiver attitudes towards obesogenic behaviours, a healthy lifestyle, nutrition, physical activity, feeding.                                                                                                   | 1,2,3 |
| Parent/caregiver awareness of behaviours       | Parent/caregiver awareness of physical activity behaviours and feeding practices.                                                                                                                                       | 1,2,3 |
| Parent/caregiver beliefs                       | Parent/caregiver beliefs in relation to feeding, healthy eating, physical activity, feeding.                                                                                                                            | 1,2,3 |
| Parent/caregiver health literacy               | The skills and knowledge of a person to access, understand and use information to make decisions, and take action about health and healthcare, food, physical activity.                                                 | 1,2,3 |
| Parent/caregiver knowledge                     | Parent/caregiver knowledge of food, feeding, nutrition, physical activity, exercise, healthy eating, active play, sedentary behaviours, the sustainability consequences of food and toy selections, healthy lifestyles. | 1,2,3 |
| Parent/caregiver readiness to change           | Parent/caregiver motivation, readiness for lifestyle change.                                                                                                                                                            | 1,2,3 |

|         |                                                                       |                                                                                                                                                                                                                     |       |
|---------|-----------------------------------------------------------------------|---------------------------------------------------------------------------------------------------------------------------------------------------------------------------------------------------------------------|-------|
|         | Parenting style                                                       | Includes parental style in relation to general parenting, healthy behaviours, discipline, rules, anxiety, nurturance, involvement, routine, anxiety, parental authority, cry tolerance and limit setting abilities. | 1,2,3 |
|         | Parent/caregiver responsiveness                                       | Defined as the sensitive and accepting behaviours identified in a parent/caregiver toward a child.                                                                                                                  | 1,2,3 |
|         | Family functioning                                                    | The social and structural properties of the global family environment.                                                                                                                                              | 1,2,3 |
|         | Parent/caregiver perception of child weight                           | Parent/caregiver perception of child weight, weight status, BMI, obesity risk.                                                                                                                                      | 1,2,3 |
|         | Perception of parent/caregiver influence on child's health behaviours | Perception of parent/caregiver influence on child's health behaviours.                                                                                                                                              | 1,2,3 |
|         | Parent/caregiver perceptions of adequacy of resources and barriers    | Includes parent/caregiver perceptions of time and resource barriers to meal preparation, adequacy of resources needed to plan and prepare meals.                                                                    | 1,2,3 |
| Feeding | Parent/caregiver feeding control                                      | Includes parent/caregiver feeding control practices, restriction, covert restriction, pressure to eat, monitoring.                                                                                                  | 1,2,3 |
|         | Parent/caregiver emotional feeding                                    | Includes parent/caregiver using food to regulate the child's emotional states.                                                                                                                                      | 1,2,3 |
|         | Parent/caregiver feeding encouragement                                | Includes parent/caregiver encouraging child's involvement in meal planning and preparation, promoting well-balanced food intake, teaching about nutrition.                                                          | 1,2,3 |
|         | Parent/caregiver feeding interaction                                  | Includes parent/caregiver child-feeding interaction, encouragement to eat.                                                                                                                                          | 1,2,3 |
|         | Parent/caregiver feeding structure                                    | Includes positive, structure based feeding practices (limit-setting, consistent routines) that promote self-regulation.                                                                                             | 1,2,3 |

|               |                                                       |                                                                                                                                                                                                                                                                                                                                                                                      |       |
|---------------|-------------------------------------------------------|--------------------------------------------------------------------------------------------------------------------------------------------------------------------------------------------------------------------------------------------------------------------------------------------------------------------------------------------------------------------------------------|-------|
|               | Parent/caregiver feeding style                        | Parent/caregiver style in relation to feeding.                                                                                                                                                                                                                                                                                                                                       | 1,2,3 |
|               | Parent/caregiver using food as a reward               | Includes parent/caregiver using food as a reward.                                                                                                                                                                                                                                                                                                                                    | 1,2,3 |
|               | Parent/caregiver frequency of bottle use              | Frequency of bottle use by parent/caregiver to feed child.                                                                                                                                                                                                                                                                                                                           | 1,2,3 |
|               | Parent/caregiver promoting autonomy                   | Includes parent/caregiver promoting internal control of eating, parents/caregivers allow the child control of his/her eating behaviours.                                                                                                                                                                                                                                             | 1,2,3 |
|               | Parent/caregiver that is responsible for feeding      | Includes person/s responsible for feeding.                                                                                                                                                                                                                                                                                                                                           | 1,2,3 |
| Environmental | Food environment                                      | Includes environments in which food is consumed, available, purchased, available to be purchased. Includes proximity to food store locations, the distribution of food store locations, accessibility and convenience of food sources.                                                                                                                                               | 1,2,3 |
|               | Household food security                               | Reliable access to healthy and nutritious foods.                                                                                                                                                                                                                                                                                                                                     | 1,2,3 |
|               | Family meal environment                               | Includes frequency of eating meals together as a family with the TV off, number of days that the child had dinner while watching TV, media device use at family meals, no. of days when healthy mealtimes occurred, family meals in car, at fast food restaurant, at dining table, eating alone.                                                                                     | 1,2,3 |
|               | Early childhood education and care (ECEC) environment | Includes fixed or non-fixed environmental features of childcare, preschool or kindergarten to address obesity-related behaviours (e.g. poor nutrition or diet, insufficient physical activity, excess sedentary behaviour, insufficient sleep). Fixed features might include playgrounds, kitchens. Non-fixed features might include service organisational and policies, equipment. | 1,2,3 |
|               | Healthcare environment                                | Physical environment in which healthcare is accessed.                                                                                                                                                                                                                                                                                                                                | 1,2,3 |

|                                                              |                                                     |                                                                                                                                                                                                                                                                                                                                                                                                                                                           |       |
|--------------------------------------------------------------|-----------------------------------------------------|-----------------------------------------------------------------------------------------------------------------------------------------------------------------------------------------------------------------------------------------------------------------------------------------------------------------------------------------------------------------------------------------------------------------------------------------------------------|-------|
| Emotional or cognitive functioning                           | Child internalising and/or externalising behaviours | Aggressive, internalising and externalizing behaviours in child.                                                                                                                                                                                                                                                                                                                                                                                          | 1,2,3 |
|                                                              | Child emotion regulation                            | Includes reports of child anger, frustration, temperament, emotional coping, emotion self-regulation.                                                                                                                                                                                                                                                                                                                                                     | 1,2,3 |
|                                                              | Child emotional development                         | The ability of the child to recognise, express, and manage feelings and to have empathy for the feelings of others.                                                                                                                                                                                                                                                                                                                                       | 1,2,3 |
|                                                              | Child school readiness                              | A measure of the knowledge, skills and behaviours that enable children to participate and succeed in school.                                                                                                                                                                                                                                                                                                                                              | 1,2,3 |
|                                                              | Child wellbeing                                     | Includes social-emotional wellbeing and emotional health of the child.                                                                                                                                                                                                                                                                                                                                                                                    | 1,2,3 |
|                                                              | Child attention control                             | Child's ability to stay focused.                                                                                                                                                                                                                                                                                                                                                                                                                          | 1,2,3 |
|                                                              | Child cognitive development                         | Includes child communication, problem solving and personal social skills.                                                                                                                                                                                                                                                                                                                                                                                 | 1,2,3 |
|                                                              | Child executive function                            | Includes tests for child's working memory, inhibition.                                                                                                                                                                                                                                                                                                                                                                                                    | 1,2,3 |
|                                                              | Child self-regulation                               | Includes child's ability to stop doing a task, inhibitory control, self-regulation.                                                                                                                                                                                                                                                                                                                                                                       | 1,2,3 |
| Motor skill development                                      | Child fundamental movement skills                   | Includes motor skills, locomotor skills (run, gallop, hop, leap, horizontal jump, slide and balance), object control skills (striking a stationary ball, stationary dribble, catch, kick, overhand throw and underhand roll, shuttle run (speed), standing long jump (speed strength), one leg stand (coordination, static balance), sit and reach (flexibility), and lateral jumping (coordination, strength endurance), motor agility, dynamic balance. | 1,2,3 |
| Perceptions of child/parent/caregiver/family and preferences | Child activity preference or perception             | Includes change in liking, degree of liking activity by child.                                                                                                                                                                                                                                                                                                                                                                                            | 1,2,3 |
|                                                              | Child food preference                               | Includes change in liking, degree of liking food by child.                                                                                                                                                                                                                                                                                                                                                                                                | 1,2,3 |

|                                |                                              |                                                                                                                                        |       |
|--------------------------------|----------------------------------------------|----------------------------------------------------------------------------------------------------------------------------------------|-------|
| Blood and lymphatic system     | Child blood pressure                         | Blood pressure of the child.                                                                                                           | 1,2,3 |
|                                | Child cholesterol                            | Cholesterol of the child.                                                                                                              | 1,2,3 |
|                                | Child glucose                                | Glucose of the child.                                                                                                                  | 1,2,3 |
|                                | Child hemoglobin                             | Hemoglobin of the child.                                                                                                               | 1,2,3 |
|                                | Child lipids                                 | Lipids of the child.                                                                                                                   | 1,2,3 |
|                                | Child metabolic and inflammatory parameters  | Metabolic and inflammatory parameters of the child.                                                                                    | 1,2,3 |
| Quality of life                | Child health-related quality of life         | An individual's or a group's perceived physical and mental health over time.                                                           | 1,2,3 |
| Economic                       | Economic evaluation                          | Includes any form of economic evaluation, including cost-effectiveness analysis, cost-utility analysis.                                | 1,2,3 |
|                                | Child healthcare utilisation                 | Includes cost and quantity of health care or services used by the child.                                                               | 1,2,3 |
|                                | Intervention cost                            | Cost of intervention.                                                                                                                  | 1,2,3 |
| Oral health                    | Child oral hygiene                           | Includes tooth-brushing and oral and dental behaviours of the child.                                                                   | 1,2,3 |
|                                | Child dental caries                          | Includes presence, number, rate and severity of caries in the child.                                                                   | 1,2,3 |
| Anthropometry                  | Birth weight adjusted for gestational age    | Child weight at birth adjusted for gestational age                                                                                     | 2,3   |
| Environmental                  | Household Chaos                              | Household chaos is characterized by high levels of confusion, disorganisation and hurriedness in the home                              | 2,3   |
| Outcomes in parents/caregivers | Parent/caregiver body image and satisfaction | Parent/caregiver thoughts and feelings about their body, including satisfaction or dissatisfaction about shape, weight and body parts. | 2,3   |



|                                    |                                              |                                                                                                                     |     |
|------------------------------------|----------------------------------------------|---------------------------------------------------------------------------------------------------------------------|-----|
| Emotional or cognitive functioning | Child self esteem                            | Child liking themselves, believing in themselves, feeling worthwhile and knowing what they do well.                 | 2,3 |
|                                    | Parent child mutually responsive orientation | Mutually responsive orientation encompasses shared cooperation and shared positive affect between parent and child. | 2,3 |
| Dietary intake                     | Child fruit intake                           | Includes quantity or frequency of child's consumption of fruits (separate from vegetable intake).                   | 2,3 |
|                                    | Child vegetable intake                       | Includes quantity or frequency of child's consumption of vegetables (separate from fruit intake).                   | 2,3 |

**Supplementary Table S4- Summary results by stakeholder group and eDelphi round**

|                                              | Health professionals | Community or organisational | Parent/caregiver | Policy-maker or funder | Researcher            | Mean of stakeholder group mean scores |
|----------------------------------------------|----------------------|-----------------------------|------------------|------------------------|-----------------------|---------------------------------------|
| <b>01 - Child weight based anthropometry</b> |                      |                             |                  |                        |                       |                                       |
| <b>Round 1</b>                               |                      |                             |                  |                        |                       |                                       |
| Mean score                                   | 7                    | 6.7                         | 6.5              | <b>8.0</b>             | <b>8.1</b>            | 7.3                                   |
| Median score                                 | 8                    | 7                           | 7                | <b>9</b>               | <b>9</b>              |                                       |
| MADM                                         | 1.4                  | 0.9                         | 1.3              | <b>1.1</b>             | <b>0.9</b>            |                                       |
| Agreement                                    | Low agreement        | High agreement              | High agreement   | <b>High agreement</b>  | <b>High agreement</b> |                                       |
|                                              | No consensus         | No consensus                | No consensus     | <b>Consensus</b>       | <b>Consensus</b>      |                                       |
| <b>Round 2</b>                               |                      |                             |                  |                        |                       |                                       |
| Mean score                                   | 7.8                  | 7.3                         | 7.1              | <b>8.1</b>             | <b>8.2</b>            | 7.7                                   |
| Median score                                 | 9                    | 7.5                         | 7                | <b>9</b>               | <b>9</b>              |                                       |
| MADM                                         | 1.3                  | 1.0                         | 0.9              | <b>0.9</b>             | <b>0.8</b>            |                                       |
| Agreement                                    | Moderate             | High                        | High             | <b>High</b>            | <b>High</b>           |                                       |
|                                              | No consensus         | No consensus                | No consensus     | <b>Consensus</b>       | <b>Consensus</b>      |                                       |
| <b>Round 3</b>                               |                      |                             |                  |                        |                       |                                       |
| Mean score                                   | <b>8.3</b>           | <b>7.8</b>                  | 7.3              | <b>8.2</b>             | <b>8.3</b>            | 8.0                                   |
| Median score                                 | <b>9</b>             | <b>8</b>                    | 7.5              | <b>9</b>               | <b>9</b>              |                                       |
| MADM                                         | <b>0.7</b>           | <b>0.7</b>                  | 1.0              | <b>0.8</b>             | <b>0.7</b>            |                                       |
| Agreement                                    | <b>High</b>          | <b>High</b>                 | High             | <b>High</b>            | <b>High</b>           |                                       |
|                                              | <b>Consensus</b>     | <b>Consensus</b>            | No consensus     | <b>Consensus</b>       | <b>Consensus</b>      |                                       |
| <b>02- Child body composition</b>            |                      |                             |                  |                        |                       |                                       |
| <b>Round 1</b>                               |                      |                             |                  |                        |                       |                                       |
| Mean score                                   | 6.5                  | 6.4                         | 6.7              | 6.5                    | 7.2                   | 6.7                                   |
| Median score                                 | 7                    | 7                           | 7                | 7                      | 7                     |                                       |
| MADM                                         | 1.5                  | 1.1                         | 0.9              | 1.4                    | 1.1                   |                                       |

|                                |              |              |              |              |              |     |
|--------------------------------|--------------|--------------|--------------|--------------|--------------|-----|
| Agreement                      | Low          | Moderate     | High         | Moderate     | High         |     |
|                                | No consensus | No consensus | No consensus | No consensus | No consensus |     |
| <b>Round 2</b>                 |              |              |              |              |              |     |
| Mean score                     | 6.9          | 7.2          | 6.9          | 6.7          | 7.4          | 7.0 |
| Median score                   | 7            | 7            | 7            | 7            | 7            |     |
| MADM                           | 1.2          | 0.5          | 0.9          | 1.0          | 1.1          |     |
| Agreement                      | Moderate     | High         | High         | High         | Moderate     |     |
|                                | No consensus | No consensus | No consensus | No consensus | No consensus |     |
| <b>Round 3</b>                 |              |              |              |              |              |     |
| Mean score                     | 7.0          | 7.2          | 6.8          | 6.3          | 7.4          | 6.9 |
| Median score                   | 7            | 7            | 6.5          | 7            | 7            |     |
| MADM                           | 1.2          | 0.6          | 1.2          | 1.1          | 1.0          |     |
| Agreement                      | Moderate     | High         | Moderate     | Moderate     | High         |     |
|                                | No consensus | No consensus | No consensus | No consensus | No consensus |     |
| <b>03- Child circumference</b> |              |              |              |              |              |     |
| <b>Round 1</b>                 |              |              |              |              |              |     |
| Mean score                     | 6.3          | 5.9          | 6.4          | 6.7          | 7.2          | 6.5 |
| Median score                   | 6            | 6            | 7            | 7            | 7            |     |
| MADM                           | 1.4          | 1.1          | 1.2          | 1.2          | 1.2          |     |
| Agreement                      | Moderate     | High         | Moderate     | Moderate     | Moderate     |     |
|                                | No consensus | No consensus | No consensus | No consensus | No consensus |     |
| <b>Round 2</b>                 |              |              |              |              |              |     |
| Mean score                     | 6.5          | 6.3          | 6.6          | 6.3          | 7.0          | 6.5 |
| Median score                   | 7            | 6            | 7            | 7            | 7            |     |
| MADM                           | 1.1          | 0.7          | 0.4          | 0.9          | 1.1          |     |
| Agreement                      | Moderate     | High         | High         | High         | Moderate     |     |
|                                | No consensus | No consensus | No consensus | No consensus | No consensus |     |
| <b>Round 3</b>                 |              |              |              |              |              |     |
| Mean score                     | 6.7          | 6.6          | 6.7          | 6.3          | 7.0          | 6.6 |

|                                                                      |              |              |              |              |              |     |
|----------------------------------------------------------------------|--------------|--------------|--------------|--------------|--------------|-----|
| Median score                                                         | 7            | 6            | 6.5          | 7            | 7            |     |
| MADM                                                                 | 0.7          | 0.6          | 0.7          | 1.1          | 1.0          |     |
| Agreement                                                            | High         | High         | High         | Moderate     | High         |     |
|                                                                      | No consensus | No consensus | No consensus | No consensus | No consensus |     |
| <b>04- Child screen time</b>                                         |              |              |              |              |              |     |
| <b>Round 1</b>                                                       |              |              |              |              |              |     |
| Mean score                                                           | 7.7          | 7.7          | 7.3          | 7.9          | 7.5          | 7.6 |
| Median score                                                         | 8            | 8            | 7            | 9            | 8.0          |     |
| MADM                                                                 | 1.2          | 0.9          | 1.4          | 1.1          | 1.1          |     |
| Agreement                                                            | Moderate     | High         | High         | High         | Moderate     |     |
|                                                                      | Consensus    | Consensus    | No consensus | Consensus    | Consensus    |     |
| <b>Round 2</b>                                                       |              |              |              |              |              |     |
| Mean score                                                           | 8.0          | 7.7          | 7.4          | 8.1          | 7.7          | 7.8 |
| Median score                                                         | 8            | 8            | 7            | 9            | 8            |     |
| MADM                                                                 | 1.0          | 1.0          | 1.3          | 0.9          | 0.9          |     |
| Agreement                                                            | High         | High         | Moderate     | High         | High         |     |
|                                                                      | Consensus    | Consensus    | No consensus | Consensus    | Consensus    |     |
| <b>Round 3</b>                                                       |              |              |              |              |              |     |
| Mean score                                                           | 7.5          | 8.0          | 7.7          | 8.3          | 7.8          | 7.9 |
| Median score                                                         | 8            | 8            | 7.5          | 9            | 8            |     |
| MADM                                                                 | 0.8          | 0.7          | 1.0          | 0.7          | 0.9          |     |
| Agreement                                                            | High         | High         | High         | High         | High         |     |
|                                                                      | Consensus    | Consensus    | Consensus    | Consensus    | Consensus    |     |
| <b>05- Sedentary behaviour or physical activity home environment</b> |              |              |              |              |              |     |
| <b>Round 1</b>                                                       |              |              |              |              |              |     |
| Mean score                                                           | 7.6          | 7.4          | 7.8          | 7.8          | 7.1          | 7.6 |
| Median score                                                         | 8            | 8            | 8            | 9            | 7            |     |
| MADM                                                                 | 1.2          | 1.1          | 0.8          | 1.2          | 1.2          |     |
| Agreement                                                            | Moderate     | High         | High         | Moderate     | Moderate     |     |

|                                       |                  |                  |                  |                  |                  |     |
|---------------------------------------|------------------|------------------|------------------|------------------|------------------|-----|
|                                       | <b>Consensus</b> | <b>Consensus</b> | <b>Consensus</b> | <b>Consensus</b> | No consensus     |     |
| <b>Round 2</b>                        |                  |                  |                  |                  |                  |     |
| Mean score                            | 7.8              | 7.7              | 7.5              | 8.1              | 7.4              | 7.7 |
| Median score                          | 8                | 7                | 8                | 9                | 8                |     |
| MADM                                  | 1.0              | 0.9              | 0.7              | 0.9              | 1.0              |     |
| Agreement                             | High             | High             | High             | High             | High             |     |
|                                       | <b>Consensus</b> | <b>Consensus</b> | <b>Consensus</b> | <b>Consensus</b> | No consensus     |     |
| <b>Round 3</b>                        |                  |                  |                  |                  |                  |     |
| Mean score                            | 7.6              | 8.3              | 8.3              | 8.2              | 7.5              | 8.0 |
| Median score                          | 8                | 9                | 8                | 9                | 8                |     |
| MADM                                  | 1.1              | 0.7              | 0.3              | 0.8              | 1.0              |     |
| Agreement                             | High             | High             | High             | High             | High             |     |
|                                       | <b>Consensus</b> | <b>Consensus</b> | <b>Consensus</b> | <b>Consensus</b> | <b>Consensus</b> |     |
| <b>06- Child time spent sedentary</b> |                  |                  |                  |                  |                  |     |
| <b>Round 1</b>                        |                  |                  |                  |                  |                  |     |
| Mean score                            | 7.7              | 7.8              | 8.1              | 7.9              | 7.4              | 7.8 |
| Median score                          | 8                | 8                | 8                | 9                | 8                |     |
| MADM                                  | 1.0              | 0.8              | 0.9              | 1.1              | 1.1              |     |
| Agreement                             | High             | High             | High             | High             | Moderate         |     |
|                                       | <b>Consensus</b> | <b>Consensus</b> | <b>Consensus</b> | <b>Consensus</b> | <b>Consensus</b> |     |
| <b>Round 2</b>                        |                  |                  |                  |                  |                  |     |
| Mean score                            | 8.0              | 8.1              | 8.0              | 8.1              | 7.7              | 8.0 |
| Median score                          | 8                | 9                | 9                | 9                | 8                |     |
| MADM                                  | 0.8              | 0.9              | 1.0              | 0.9              | 0.9              |     |
| Agreement                             | High             | High             | High             | High             | High             |     |
|                                       | <b>Consensus</b> | <b>Consensus</b> | <b>Consensus</b> | <b>Consensus</b> | <b>Consensus</b> |     |
| <b>Round 3</b>                        |                  |                  |                  |                  |                  |     |
| Mean score                            | 8.1              | 8.5              | 8.5              | 8.2              | 7.8              | 8.2 |
| Median score                          | 8                | 9                | 9                | 9                | 8                |     |

|                                   |              |                  |              |              |              |     |
|-----------------------------------|--------------|------------------|--------------|--------------|--------------|-----|
| MADM                              | 0.9          | 0.5              | 0.5          | 0.8          | 0.8          |     |
| Agreement                         | High         | High             | High         | High         | High         |     |
|                                   | Consensus    | Consensus        | Consensus    | Consensus    | Consensus    |     |
| <b>07- Child active transport</b> |              |                  |              |              |              |     |
| <b>Round 1</b>                    |              |                  |              |              |              |     |
| Mean score                        | 6.7          | 6.6              | 6.2          | 6.7          | 6.3          | 6.5 |
| Median score                      | 7            | 7                | 6            | 7            | 6            |     |
| MADM                              | 1.1          | 1.2              | 1.2          | 1.2          | 1.3          |     |
| Agreement                         | Moderate     | Moderate         | Moderate     | Moderate     | Moderate     |     |
|                                   | No consensus | No consensus     | No consensus | No consensus | No consensus |     |
| <b>Round 2</b>                    |              |                  |              |              |              |     |
| Mean score                        | 6.7          | 6.8              | 6.7          | 6.9          | 6.4          | 6.7 |
| Median score                      | 7            | 7                | 7            | 7            | 7            |     |
| MADM                              | 0.8          | 0.9              | 0.8          | 0.6          | 1.3          |     |
| Agreement                         | High         | High             | High         | High         | Moderate     |     |
|                                   | No consensus | No consensus     | No consensus | No consensus | No consensus |     |
| <b>Round 3</b>                    |              |                  |              |              |              |     |
| Mean score                        | 6.8          | <b>7.3</b>       | 7.0          | 7.0          | 6.6          | 6.9 |
| Median score                      | 7            | <b>8</b>         | 7            | 7            | 7            |     |
| MADM                              | 0.7          | <b>0.7</b>       | 1.3          | 0.7          | 1.1          |     |
| Agreement                         | High         | <b>High</b>      | Moderate     | High         | Moderate     |     |
|                                   | No consensus | <b>Consensus</b> | No consensus | No consensus | No consensus |     |
| <b>08- Child physical fitness</b> |              |                  |              |              |              |     |
| <b>Round 1</b>                    |              |                  |              |              |              |     |
| Mean score                        | 6.6          | 6.5              | 6.6          | 6.7          | 6.4          | 6.6 |
| Median score                      | 7            | 6                | 6            | 7            | 7            |     |
| MADM                              | 1.5          | 1.3              | 1.2          | 1.4          | 1.2          |     |
| Agreement                         | Low          | Moderate         | Moderate     | Moderate     | Moderate     |     |
|                                   | No consensus | No consensus     | No consensus | No consensus | No consensus |     |

| <b>Round 2</b>                      |              |                  |                  |              |               |     |
|-------------------------------------|--------------|------------------|------------------|--------------|---------------|-----|
| Mean score                          | 6.6          | 7.1              | 7.2              | 6.9          | 6.5           | 6.9 |
| Median score                        | 7            | 7                | 7                | 7            | 7             |     |
| MADM                                | 1.2          | 0.8              | 0.7              | 0.8          | 1.1           |     |
| Agreement                           | Moderate     | High             | High             | High         | Moderate      |     |
|                                     | No consensus | No consensus     | No consensus     | No consensus | No consensus  |     |
| <b>Round 3</b>                      |              |                  |                  |              |               |     |
| Mean score                          | 7.0          | <b>7.3</b>       | <b>7.2</b>       | 7.4          | 6.5           | 7.1 |
| Median score                        | 7            | <b>8</b>         | <b>7</b>         | 8            | 7             |     |
| MADM                                | 1.1          | <b>0.7</b>       | <b>0.5</b>       | 0.8          | 1.1           |     |
| Agreement                           | High         | <b>High</b>      | <b>High</b>      | High         | Moderate      |     |
|                                     | No consensus | <b>Consensus</b> | <b>Consensus</b> | No consensus | No consensus  |     |
| <b>09- Child active indoor play</b> |              |                  |                  |              |               |     |
| <b>Round 1</b>                      |              |                  |                  |              |               |     |
| Mean score                          | 6.8          | 6.5              | 6.8              | 6.8          | 6.6           | 6.7 |
| Median score                        | 7            | 6                | 7                | 7            | 7             |     |
| MADM                                | 1.2          | 1.3              | 1.1              | 1.3          | 1.1           |     |
| Agreement                           | Moderate     | Moderate         | High             | Moderate     | High          |     |
|                                     | No consensus | No consensus     | No consensus     | No consensus | Non consensus |     |
| <b>Round 2</b>                      |              |                  |                  |              |               |     |
| Mean score                          | 6.7          | 6.7              | 7.0              | 7.0          | 6.6           | 6.8 |
| Median score                        | 7            | 7                | 7                | 7            | 7             |     |
| MADM                                | 1.0          | 1.4              | 0.9              | 1.0          | 0.9           |     |
| Agreement                           | High         | Moderate         | High             | High         | High          |     |
|                                     | No consensus | No consensus     | No consensus     | No consensus | No consensus  |     |
| <b>Round 3</b>                      |              |                  |                  |              |               |     |
| Mean score                          | 6.5          | <b>7.5</b>       | <b>7.7</b>       | 7.2          | 6.7           | 7.1 |
| Median score                        | 6            | <b>8</b>         | <b>8</b>         | 7            | 7             |     |
| MADM                                | 1.1          | <b>0.5</b>       | <b>1.0</b>       | 1.3          | 0.9           |     |

|                                      |                  |                  |                  |                  |                  |     |
|--------------------------------------|------------------|------------------|------------------|------------------|------------------|-----|
| Agreement                            | Moderate         | High             | High             | Moderate         | High             |     |
|                                      | No consensus     | Consensus        | Consensus        | No consensus     | No consensus     |     |
| <b>10- Child active outdoor play</b> |                  |                  |                  |                  |                  |     |
| <b>Round 1</b>                       |                  |                  |                  |                  |                  |     |
| Mean score                           | 7.3              | 7.3              | 7.1              | 7.2              | 7.0              | 7.2 |
| Median score                         | 7                | 8                | 7                | 7                | 7                |     |
| MADM                                 | 1.2              | 1.3              | 0.9              | 1.2              | 1.0              |     |
| Agreement                            | Moderate         | Moderate         | High             | Moderate         | High             |     |
|                                      | No consensus     | No consensus     | No consensus     | No consensus     | No consensus     |     |
| <b>Round 2</b>                       |                  |                  |                  |                  |                  |     |
| Mean score                           | <b>7.3</b>       | <b>7.7</b>       | <b>7.6</b>       | 7.2              | 7.2              | 7.4 |
| Median score                         | <b>7</b>         | <b>8</b>         | <b>8</b>         | 7.5              | 7                |     |
| MADM                                 | <b>0.8</b>       | <b>1.0</b>       | <b>0.9</b>       | 1.1              | 0.9              |     |
| Agreement                            | <b>High</b>      | <b>High</b>      | <b>High</b>      | High             | High             |     |
|                                      | <b>Consensus</b> | <b>Consensus</b> | <b>Consensus</b> | No consensus     | No consensus     |     |
| <b>Round 3</b>                       |                  |                  |                  |                  |                  |     |
| Mean score                           | 7.5              | <b>8.0</b>       | <b>8.5</b>       | 6.8              | <b>7.3</b>       | 7.6 |
| Median score                         | 7                | <b>8</b>         | <b>9</b>         | 7                | <b>7</b>         |     |
| MADM                                 | 1.3              | <b>0.3</b>       | <b>0.5</b>       | 1.6              | <b>0.9</b>       |     |
| Agreement                            | Moderate         | <b>High</b>      | <b>High</b>      | Low              | <b>High</b>      |     |
|                                      | No consensus     | <b>Consensus</b> | <b>Consensus</b> | No consensus     | <b>Consensus</b> |     |
| <b>11- Child physical activity</b>   |                  |                  |                  |                  |                  |     |
| <b>Round 1</b>                       |                  |                  |                  |                  |                  |     |
| Mean score                           | <b>7.7</b>       | <b>7.7</b>       | <b>7.9</b>       | <b>8.1</b>       | <b>7.7</b>       | 7.8 |
| Median score                         | <b>8</b>         | <b>8</b>         | <b>9</b>         | <b>8</b>         | <b>8</b>         |     |
| MADM                                 | <b>1.0</b>       | <b>0.9</b>       | <b>1.1</b>       | <b>0.8</b>       | <b>0.9</b>       |     |
| Agreement                            | <b>High</b>      | <b>High</b>      | <b>Moderate</b>  | <b>High</b>      | <b>High</b>      |     |
|                                      | <b>Consensus</b> | <b>Consensus</b> | <b>Consensus</b> | <b>Consensus</b> | <b>Consensus</b> |     |
| <b>Round 2</b>                       |                  |                  |                  |                  |                  |     |



|                              |              |              |              |              |              |     |
|------------------------------|--------------|--------------|--------------|--------------|--------------|-----|
| Mean score                   | 7.9          | 7.6          | 8.4          | 8.4          | 7.9          | 8.0 |
| Median score                 | 8            | 7            | 9            | 9            | 8            | 2   |
| MADM                         | 0.9          | 1.0          | 0.6          | 0.6          | 0.7          |     |
| Agreement                    | High         | High         | High         | High         | High         |     |
|                              | Consensus    | Consensus    | Consensus    | Consensus    | Consensus    |     |
| <b>Round 3</b>               |              |              |              |              |              |     |
| Mean score                   | 8.0          | 8.0          | 8.8          | 8.4          | 8.1          | 8.3 |
| Median score                 | 9            | 8            | 9            | 9            | 8            |     |
| MADM                         | 1.0          | 0.7          | 0.2          | 0.6          | 0.7          |     |
| Agreement                    | High         | High         | High         | High         | High         |     |
|                              | Consensus    | Consensus    | Consensus    | Consensus    | Consensus    |     |
| <b>12- Infant tummy time</b> |              |              |              |              |              |     |
| <b>Round 1</b>               |              |              |              |              |              |     |
| Mean score                   | 6.60         | 7.47         | 6.39         | 6.61         | 5.93         | 6.6 |
| Median score                 | 7.0          | 8.0          | 6.5          | 6.0          | 6.0          |     |
| MADM                         | 1.74         | 1.12         | 1.94         | 1.83         | 1.48         |     |
| Agreement                    | Low          | Moderate     | Low          | Low          | Low          |     |
|                              | No consensus | No consensus | No consensus | No consensus | No consensus |     |
| <b>Round 2</b>               |              |              |              |              |              |     |
| Mean score                   | 6.9          | 8.1          | 7.2          | 6.9          | 6.2          | 7.1 |
| Median score                 | 7            | 9            | 8            | 7            | 6            |     |
| MADM                         | 1.4          | 1.3          | 1.4          | 1.6          | 1.4          |     |
| Agreement                    | Moderate     | Moderate     | Moderate     | Low          | Low          |     |
|                              | No consensus | No consensus | No consensus | No consensus | No consensus |     |
| <b>Round 3</b>               |              |              |              |              |              |     |
| Mean score                   | 6.7          | 7.8          | 7.8          | 7.3          | 6.3          | 7.2 |
| Median score                 | 7            | 8            | 9            | 9            | 7            |     |
| MADM                         | 1.3          | 1.0          | 1.2          | 1.8          | 1.3          |     |
| Agreement                    | Moderate     | High         | Moderate     | Low          | Moderate     |     |

|                                                             |              |                  |                  |              |              |     |
|-------------------------------------------------------------|--------------|------------------|------------------|--------------|--------------|-----|
|                                                             | No consensus | No consensus     | <b>Consensus</b> | No consensus | No consensus |     |
| <b>13- Infant floor based play time</b>                     |              |                  |                  |              |              |     |
| <b>Round 1</b>                                              |              |                  |                  |              |              |     |
| Mean score                                                  | 6.7          | 7.4              | 6.8              | 6.7          | 6.0          | 6.7 |
| Median score                                                | 7            | 8                | 7                | 6            | 6            |     |
| MADM                                                        | 1.5          | 1.2              | 1.3              | 1.7          | 1.4          |     |
| Agreement                                                   | Low          | Moderate         | Moderate         | Low          | Moderate     |     |
|                                                             | No consensus | No consensus     | No consensus     | No consensus | No consensus |     |
| <b>Round 2</b>                                              |              |                  |                  |              |              |     |
| Mean score                                                  | 7.2          | 7.9              | 7.1              | 6.6          | 6.2          | 7.0 |
| Median score                                                | 7            | 8                | 7                | 6            | 7            |     |
| MADM                                                        | 1.1          | 0.9              | 1.2              | 1.5          | 1.3          |     |
| Agreement                                                   | Moderate     | High             | Moderate         | Low          | Moderate     |     |
|                                                             | No consensus | No consensus     | No consensus     | No consensus | No consensus |     |
| <b>Round 3</b>                                              |              |                  |                  |              |              |     |
| Mean score                                                  | 7.1          | <b>8.0</b>       | <b>8.7</b>       | 6.9          | 6.3          | 7.4 |
| Median score                                                | 7            | <b>8</b>         | <b>9</b>         | 6            | 6            |     |
| MADM                                                        | 1.1          | <b>0.8</b>       | <b>0.3</b>       | 1.8          | 1.1          |     |
| Agreement                                                   | Moderate     | <b>High</b>      | <b>High</b>      | Low          | Moderate     |     |
|                                                             | No consensus | <b>Consensus</b> | <b>Consensus</b> | No consensus | No consensus |     |
| <b>14- Child enjoyment of physical activity and playing</b> |              |                  |                  |              |              |     |
| <b>Round 1</b>                                              |              |                  |                  |              |              |     |
| Mean score                                                  | 7.3          | <b>8.0</b>       | <b>7.8</b>       | 7.0          | 6.2          | 7.3 |
| Median score                                                | 8            | <b>9</b>         | <b>8</b>         | 7            | 6            |     |
| MADM                                                        | 1.4          | <b>1.0</b>       | <b>1.0</b>       | 1.6          | 1.2          |     |
| Agreement                                                   | Moderate     | <b>High</b>      | <b>High</b>      | Low          | Moderate     |     |
|                                                             | No consensus | <b>Consensus</b> | <b>Consensus</b> | No consensus | No consensus |     |
| <b>Round 2</b>                                              |              |                  |                  |              |              |     |
| Mean score                                                  | <b>7.7</b>   | <b>8.2</b>       | 7.7              | 6.9          | 6.2          | 7.3 |

|                                 |                  |                  |                  |              |              |     |
|---------------------------------|------------------|------------------|------------------|--------------|--------------|-----|
| Median score                    | <b>8</b>         | <b>9</b>         | 8                | 7            | 6            |     |
| MADM                            | <b>1.1</b>       | <b>0.8</b>       | 0.8              | 1.3          | 1.2          |     |
| Agreement                       | <b>Moderate</b>  | <b>High</b>      | High             | Moderate     | Moderate     |     |
|                                 | <b>Consensus</b> | <b>Consensus</b> | No consensus     | No consensus | No consensus |     |
| <b>Round 3</b>                  |                  |                  |                  |              |              |     |
| Mean score                      | <b>7.7</b>       | <b>8.5</b>       | <b>8.2</b>       | 7.3          | 6.2          | 7.6 |
| Median score                    | <b>8</b>         | <b>9</b>         | <b>9</b>         | 8            | 6            |     |
| MADM                            | <b>1.2</b>       | <b>0.5</b>       | <b>0.8</b>       | 1.3          | 1.3          |     |
| Agreement                       | <b>Moderate</b>  | <b>High</b>      | <b>High</b>      | Moderate     | Moderate     |     |
|                                 | <b>Consensus</b> | <b>Consensus</b> | <b>Consensus</b> | No consensus | No consensus |     |
| <b>15- Child sleep duration</b> |                  |                  |                  |              |              |     |
| <b>Round 1</b>                  |                  |                  |                  |              |              |     |
| Mean score                      | 6.6              | 7.1              | 7.0              | 6.9          | 7.1          | 6.9 |
| Median score                    | 6                | 8                | 7                | 7            | 7            |     |
| MADM                            | 1.1              | 1.1              | 1.4              | 1.7          | 1.0          |     |
| Agreement                       | High             | Moderate         | Moderate         | Low          | High         |     |
|                                 | No consensus     | No consensus     | No consensus     | No consensus | No consensus |     |
| <b>Round 2</b>                  |                  |                  |                  |              |              |     |
| Mean score                      | 6.7              | 7.3              | <b>7.7</b>       | 7.3          | 7.2          | 7.2 |
| Median score                    | 7                | 7                | <b>8</b>         | 8            | 7            |     |
| MADM                            | 1.0              | 1.0              | <b>0.8</b>       | 1.4          | 0.8          |     |
| Agreement                       | High             | High             | <b>High</b>      | Low          | High         |     |
|                                 | No consensus     | No consensus     | <b>Consensus</b> | No consensus | Consensus    |     |
| <b>Round 3</b>                  |                  |                  |                  |              |              |     |
| Mean score                      | 7.1              | 7.4              | <b>7.7</b>       | 6.9          | 7.2          | 7.3 |
| Median score                    | 7                | 7                | <b>8</b>         | 7            | 7            |     |
| MADM                            | 0.9              | 0.8              | <b>0.7</b>       | 1.4          | 0.8          |     |
| Agreement                       | High             | High             | <b>High</b>      | Low          | High         |     |
|                                 | No consensus     | No consensus     | <b>Consensus</b> | No consensus | No consensus |     |

| <b>16- Child sleep disturbance or problems</b> |              |              |                  |              |              |     |
|------------------------------------------------|--------------|--------------|------------------|--------------|--------------|-----|
| <b>Round 1</b>                                 |              |              |                  |              |              |     |
| Mean score                                     | 6.8          | 7.2          | 6.4              | 6.1          | 6.4          | 6.6 |
| Median score                                   | 7            | 8            | 7                | 7            | 6            |     |
| MADM                                           | 1.1          | 1.2          | 1.4              | 1.8          | 1.2          |     |
| Agreement                                      | High         | Moderate     | Moderate         | Low          | Moderate     |     |
|                                                | No consensus | No consensus | No consensus     | No consensus | No consensus |     |
| <b>Round 2</b>                                 |              |              |                  |              |              |     |
| Mean score                                     | 6.8          | 7.2          | <b>7.0</b>       | 6.2          | 6.6          | 6.7 |
| Median score                                   | 7            | 7            | <b>7</b>         | 7            | 6            |     |
| MADM                                           | 0.8          | 1.1          | <b>0.7</b>       | 1.6          | 1.0          |     |
| Agreement                                      | High         | Moderate     | <b>High</b>      | Low          | High         |     |
|                                                | No consensus | No consensus | <b>Consensus</b> | No consensus | No consensus |     |
| <b>Round 3</b>                                 |              |              |                  |              |              |     |
| Mean score                                     | 7.1          | 7.2          | 6.8              | 5.8          | 6.5          | 6.7 |
| Median score                                   | 7            | 7            | 7                | 7            | 6            |     |
| MADM                                           | 0.8          | 0.6          | 1.2              | 1.5          | 1.0          |     |
| Agreement                                      | High         | High         | Moderate         | Low          | High         |     |
|                                                | No consensus | No consensus | No consensus     | No consensus | No consensus |     |
| <b>17- Child sleep efficiency</b>              |              |              |                  |              |              |     |
| <b>Round 1</b>                                 |              |              |                  |              |              |     |
| Mean score                                     | 6.1          | 7.0          | 6.2              | 5.8          | 5.9          | 6.2 |
| Median score                                   | 6            | 7            | 6                | 6            | 6            |     |
| MADM                                           | 1.2          | 1.1          | 1.2              | 1.7          | 1.1          |     |
| Agreement                                      | Moderate     | High         | Moderate         | Low          | Moderate     |     |
|                                                | No consensus | No consensus | No consensus     | No consensus | No consensus |     |
| <b>Round 2</b>                                 |              |              |                  |              |              |     |
| Mean score                                     | 6.5          | 7.1          | 6.7              | 6.5          | 6.0          | 6.6 |
| Median score                                   | 6            | 7            | 7                | 7            | 6            |     |

|                                           |              |              |                  |              |              |     |
|-------------------------------------------|--------------|--------------|------------------|--------------|--------------|-----|
| MADM                                      | 0.9          | 0.6          | 1.1              | 1.5          | 1.0          |     |
| Agreement                                 | High         | High         | Moderate         | Low          | High         |     |
|                                           | No consensus | No consensus | No consensus     | No consensus | No consensus |     |
| <b>Round 3</b>                            |              |              |                  |              |              |     |
| Mean score                                | 6.7          | 7.2          | <b>7.3</b>       | 6.1          | 6.0          | 6.7 |
| Median score                              | 6            | 7            | <b>8</b>         | 7            | 6            |     |
| MADM                                      | 0.8          | 1.0          | <b>0.7</b>       | 1.6          | 1.0          |     |
| Agreement                                 | High         | High         | <b>High</b>      | Low          | High         |     |
|                                           | No consensus | No consensus | <b>Consensus</b> | No consensus | No consensus |     |
| <b>18- Child sleep latency</b>            |              |              |                  |              |              |     |
| <b>Round 1</b>                            |              |              |                  |              |              |     |
| Mean score                                | 5.9          | 6.3          | 5.5              | 5.5          | 5.5          | 5.8 |
| Median score                              | 6            | 7            | 5                | 6            | 6            |     |
| MADM                                      | 1.2          | 1.2          | 1.4              | 1.6          | 1.2          |     |
| Agreement                                 | Moderate     | Moderate     | Moderate         | Low          | Moderate     |     |
|                                           | No consensus | No consensus | No consensus     | No consensus | No consensus |     |
| <b>Round 2</b>                            |              |              |                  |              |              |     |
| Mean score                                | 6.0          | 6.4          | 5.4              | 5.7          | 5.4          | 5.8 |
| Median score                              | 6            | 7            | 5                | 6            | 5            |     |
| MADM                                      | 0.9          | 1.1          | 1.4              | 1.3          | 1.2          |     |
| Agreement                                 | High         | Moderate     | Moderate         | Moderate     | Moderate     |     |
|                                           | No consensus | No consensus | No consensus     | No consensus | No consensus |     |
| <b>Round 3</b>                            |              |              |                  |              |              |     |
| Mean score                                | 6.3          | 6.8          | 6.6              | 5.5          | 5.3          | 6.1 |
| Median score                              | 6            | 7            | 7                | 6            | 5            |     |
| MADM                                      | 0.9          | 1.0          | 1.2              | 1.3          | 1.2          |     |
| Agreement                                 | High         | High         | Moderate         | Moderate     | Moderate     |     |
|                                           | No consensus | No consensus | No consensus     | No consensus | No consensus |     |
| <b>19- Child sleep patterns or timing</b> |              |              |                  |              |              |     |

| <b>Round 1</b>                 |              |              |              |              |              |     |
|--------------------------------|--------------|--------------|--------------|--------------|--------------|-----|
| Mean score                     | 6.3          | 6.1          | 6.2          | 5.9          | 6.6          | 6.2 |
| Median score                   | 6            | 7            | 6            | 6            | 7            |     |
| MADM                           | 1.2          | 1.4          | 1.3          | 1.7          | 1.3          |     |
| Agreement                      | Moderate     | Low          | Moderate     | Low          | Moderate     |     |
|                                | No consensus | No consensus | No consensus | No consensus | No consensus |     |
| <b>Round 2</b>                 |              |              |              |              |              |     |
| Mean score                     | 6.4          | 5.7          | 6.5          | 6.2          | 6.6          | 6.3 |
| Median score                   | 7            | 6            | 7            | 7            | 7            |     |
| MADM                           | 1.2          | 1.0          | 1.0          | 1.2          | 1.3          |     |
| Agreement                      | Moderate     | High         | High         | Moderate     | Moderate     |     |
|                                | No consensus | No consensus | No consensus | No consensus | No consensus |     |
| <b>Round 3</b>                 |              |              |              |              |              |     |
| Mean score                     | 7.1          | 5.8          | 6.8          | 6.2          | 6.6          | 6.5 |
| Median score                   | 7            | 6            | 7            | 6            | 7            |     |
| MADM                           | 0.8          | 1.4          | 1.2          | 1.3          | 1.3          |     |
| Agreement                      | High         | Moderate     | Moderate     | Moderate     | Moderate     |     |
|                                | No consensus | No consensus | No consensus | No consensus | No consensus |     |
| <b>20- Child sleep quality</b> |              |              |              |              |              |     |
| <b>Round 1</b>                 |              |              |              |              |              |     |
| Mean score                     | 6.8          | 7.2          | 6.8          | 6.6          | 6.7          | 6.8 |
| Median score                   | 7            | 8            | 7            | 7            | 7            |     |
| MADM                           | 1.2          | 1.1          | 1.3          | 1.4          | 1.2          |     |
| Agreement                      | Moderate     | Moderate     | Moderate     | Low          | Moderate     |     |
|                                | No consensus | No consensus | No consensus | No consensus | No consensus |     |
| <b>Round 2</b>                 |              |              |              |              |              |     |
| Mean score                     | 7.1          | 7.1          | <b>7.5</b>   | 7.0          | 6.7          | 7.1 |
| Median score                   | 7            | 7            | <b>8</b>     | 7            | 7            |     |
| MADM                           | 0.9          | 0.8          | <b>1.0</b>   | 1.1          | 1.0          |     |

|                                                      |              |              |              |              |              |     |
|------------------------------------------------------|--------------|--------------|--------------|--------------|--------------|-----|
| Agreement                                            | High         | High         | High         | Moderate     | High         |     |
|                                                      | No consensus | No consensus | Consensus    | No consensus | No consensus |     |
| <b>Round 3</b>                                       |              |              |              |              |              |     |
| Mean score                                           | 7.4          | 7.2          | 7.5          | 6.9          | 6.6          | 7.1 |
| Median score                                         | 7            | 7            | 8            | 7            | 7            |     |
| MADM                                                 | 0.8          | 0.2          | 0.8          | 1.7          | 0.9          |     |
| Agreement                                            | High         | High         | High         | Low          | High         |     |
|                                                      | Consensus    | Consensus    | No consensus | No consensus | No consensus |     |
| <b>21- Child carbohydrate intake or glycemc load</b> |              |              |              |              |              |     |
| <b>Round 1</b>                                       |              |              |              |              |              |     |
| Mean score                                           | 6.4          | 6.6          | 6.4          | 5.9          | 5.6          | 6.2 |
| Median score                                         | 6            | 7            | 6            | 6            | 6            |     |
| MADM                                                 | 1.3          | 1.1          | 1.5          | 1.3          | 1.5          |     |
| Agreement                                            | Moderate     | High         | Low          | Moderate     | Low          |     |
|                                                      | No consensus | No consensus | No consensus | No consensus | No consensus |     |
| <b>Round 2</b>                                       |              |              |              |              |              |     |
| Mean score                                           | 6.3          | 7.3          | 6.1          | 5.8          | 5.6          | 6.2 |
| Median score                                         | 6            | 8            | 6            | 6            | 6            |     |
| MADM                                                 | 0.9          | 0.7          | 1.1          | 1.2          | 1.3          |     |
| Agreement                                            | High         | High         | Moderate     | Moderate     | Moderate     |     |
|                                                      | No consensus | No consensus | No consensus | No consensus | No consensus |     |
| <b>Round 3</b>                                       |              |              |              |              |              |     |
| Mean score                                           | 6.5          | 7.4          | 6.5          | 5.9          | 5.4          | 6.3 |
| Median score                                         | 7            | 8            | 6            | 6            | 6            |     |
| MADM                                                 | 1.0          | 0.6          | 1.2          | 1.2          | 1.2          |     |
| Agreement                                            | High         | High         | Moderate     | Moderate     | Moderate     |     |
|                                                      | No consensus | No consensus | No consensus | No consensus | No consensus |     |
| <b>22- Child dairy intake</b>                        |              |              |              |              |              |     |
| <b>Round 1</b>                                       |              |              |              |              |              |     |

|                               |                  |                  |                  |                  |                  |     |
|-------------------------------|------------------|------------------|------------------|------------------|------------------|-----|
| Mean score                    | 6.3              | 6.4              | 6.0              | 6.2              | 5.6              | 6.1 |
| Median score                  | 6                | 7                | 6                | 6                | 6                |     |
| MADM                          | 1.2              | 1.2              | 1.5              | 1.3              | 1.3              |     |
| Agreement                     | Moderate         | Moderate         | Low              | Moderate         | Moderate         |     |
|                               | No consensus     | No consensus     | No consensus     | No consensus     | No consensus     |     |
| <b>Round 2</b>                |                  |                  |                  |                  |                  |     |
| Mean score                    | 6.5              | 6.9              | 5.6              | 6.4              | 5.6              | 6.2 |
| Median score                  | 7                | 7                | 6                | 6                | 6                |     |
| MADM                          | 0.7              | 1.0              | 1.0              | 1.3              | 1.1              |     |
| Agreement                     | High             | High             | High             | Moderate         | Moderate         |     |
|                               | No consensus     | No consensus     | No consensus     | No consensus     | No consensus     |     |
| <b>Round 3</b>                |                  |                  |                  |                  |                  |     |
| Mean score                    | 6.5              | 7.4              | 6.2              | 6.8              | 5.4              | 6.5 |
| Median score                  | 7                | 8                | 6                | 6                | 6                |     |
| MADM                          | 0.9              | 0.6              | 0.5              | 1.4              | 1.2              |     |
| Agreement                     | High             | High             | High             | Low              | Moderate         |     |
|                               | No consensus     | No consensus     | No consensus     | No consensus     | No consensus     |     |
| <b>23- Child diet quality</b> |                  |                  |                  |                  |                  |     |
| <b>Round 1</b>                |                  |                  |                  |                  |                  |     |
| Mean score                    | <b>7.7</b>       | <b>8.1</b>       | <b>8.1</b>       | <b>8.0</b>       | <b>7.7</b>       | 7.9 |
| Median score                  | <b>8</b>         | <b>8</b>         | <b>9</b>         | <b>8</b>         | <b>8</b>         |     |
| MADM                          | <b>1.0</b>       | <b>0.6</b>       | <b>0.9</b>       | <b>0.9</b>       | <b>0.9</b>       |     |
| Agreement                     | <b>High</b>      | <b>High</b>      | <b>High</b>      | <b>High</b>      | <b>High</b>      |     |
|                               | <b>Consensus</b> | <b>Consensus</b> | <b>Consensus</b> | <b>Consensus</b> | <b>Consensus</b> |     |
| <b>Round 2</b>                |                  |                  |                  |                  |                  |     |
| Mean score                    | <b>8.3</b>       | <b>8.4</b>       | <b>8.1</b>       | <b>8.1</b>       | <b>7.8</b>       | 8.2 |
| Median score                  | <b>9</b>         | <b>9</b>         | <b>8</b>         | <b>8</b>         | <b>8</b>         |     |
| MADM                          | <b>0.7</b>       | <b>0.6</b>       | <b>0.7</b>       | <b>0.7</b>       | <b>0.8</b>       |     |
| Agreement                     | <b>High</b>      | <b>High</b>      | <b>High</b>      | <b>High</b>      | <b>High</b>      |     |



|                                 |                  |                  |                  |                  |                  |     |
|---------------------------------|------------------|------------------|------------------|------------------|------------------|-----|
|                                 | <b>Consensus</b> | <b>Consensus</b> | <b>Consensus</b> | <b>Consensus</b> | <b>Consensus</b> |     |
| <b>Round 3</b>                  |                  |                  |                  |                  |                  |     |
| Mean score                      | 8.5              | 8.8              | 8.8              | 8.3              | 8.0              | 8.5 |
| Median score                    | 9                | 9                | 9                | 8                | 8                |     |
| MADM                            | 0.5              | 0.2              | 0.2              | 0.5              | 0.7              |     |
| Agreement                       | High             | High             | High             | High             | High             |     |
|                                 | <b>Consensus</b> | <b>Consensus</b> | <b>Consensus</b> | <b>Consensus</b> | <b>Consensus</b> |     |
| <b>24- Child dietary intake</b> |                  |                  |                  |                  |                  |     |
| <b>Round 1</b>                  |                  |                  |                  |                  |                  |     |
| Mean score                      | 7.3              | 7.7              | 8.1              | 8.1              | 7.5              | 7.7 |
| Median score                    | 7                | 8                | 9                | 9                | 8                |     |
| MADM                            | 1.2              | 0.8              | 1.0              | 0.9              | 1.1              |     |
| Agreement                       | Moderate         | High             | High             | High             | High             |     |
|                                 | <b>Consensus</b> | <b>Consensus</b> | <b>Consensus</b> | <b>Consensus</b> | <b>Consensus</b> |     |
| <b>Round 2</b>                  |                  |                  |                  |                  |                  |     |
| Mean score                      | 8.0              | 8.0              | 8.2              | 8.3              | 7.6              | 8.0 |
| Median score                    | 8                | 8                | 9                | 9                | 8                |     |
| MADM                            | 0.9              | 0.8              | 0.8              | 0.7              | 1.0              |     |
| Agreement                       | High             | High             | High             | High             | High             |     |
|                                 | <b>Consensus</b> | <b>Consensus</b> | <b>Consensus</b> | <b>Consensus</b> | <b>Consensus</b> |     |
| <b>Round 3</b>                  |                  |                  |                  |                  |                  |     |
| Mean score                      | 8.3              | 8.3              | 8.3              | 8.6              | 7.7              | 8.2 |
| Median score                    | 9                | 9                | 9                | 9                | 8                |     |
| MADM                            | 0.7              | 0.7              | 0.7              | 0.4              | 0.9              |     |
| Agreement                       | High             | High             | High             | High             | High             |     |
|                                 | <b>Consensus</b> | <b>Consensus</b> | <b>Consensus</b> | <b>Consensus</b> | <b>Consensus</b> |     |
| <b>25- Child fat intake</b>     |                  |                  |                  |                  |                  |     |
| <b>Round 1</b>                  |                  |                  |                  |                  |                  |     |
| Mean score                      | 6.5              | 7.1              | 6.9              | 6.8              | 6.1              | 6.7 |

|                               |              |                  |              |              |              |     |
|-------------------------------|--------------|------------------|--------------|--------------|--------------|-----|
| Median score                  | 7            | 7                | 7            | 6            | 6            |     |
| MADM                          | 1.2          | 1.2              | 1.4          | 1.3          | 1.2          |     |
| Agreement                     | Moderate     | Moderate         | Moderate     | Moderate     | Moderate     |     |
|                               | No consensus | No consensus     | No consensus | No consensus | No consensus |     |
| <b>Round 2</b>                |              |                  |              |              |              |     |
| Mean score                    | 6.6          | <b>7.6</b>       | 6.9          | 6.9          | 6.1          | 6.8 |
| Median score                  | 6            | <b>7</b>         | 7            | 7            | 6            |     |
| MADM                          | 1.0          | <b>0.6</b>       | 0.5          | 0.9          | 1.1          |     |
| Agreement                     | High         | <b>High</b>      | High         | High         | Moderate     |     |
|                               | No consensus | <b>Consensus</b> | No consensus | No consensus | No consensus |     |
| <b>Round 3</b>                |              |                  |              |              |              |     |
| Mean score                    | 6.5          | <b>8.0</b>       | 6.8          | 7.2          | 5.9          | 6.9 |
| Median score                  | 6            | <b>8</b>         | 7            | 7            | 6            |     |
| MADM                          | 0.8          | <b>0.8</b>       | 0.8          | 0.9          | 1.1          |     |
| Agreement                     | High         | <b>High</b>      | High         | High         | Moderate     |     |
|                               | No consensus | <b>Consensus</b> | No consensus | No consensus | No consensus |     |
| <b>26- Child fibre intake</b> |              |                  |              |              |              |     |
| <b>Round 1</b>                |              |                  |              |              |              |     |
| Mean score                    | 6.6          | 6.9              | 6.7          | 6.6          | 6.3          | 6.6 |
| Median score                  | 7            | 7                | 7            | 6            | 6            |     |
| MADM                          | 1.2          | 1.3              | 1.5          | 1.3          | 1.2          |     |
| Agreement                     | Moderate     | Moderate         | Low          | Moderate     | Moderate     |     |
|                               | No consensus | No consensus     | No consensus | No consensus | No consensus |     |
| <b>Round 2</b>                |              |                  |              |              |              |     |
| Mean score                    | 6.6          | 7.6              | 6.3          | 6.6          | 6.1          | 6.6 |
| Median score                  | 6            | 8                | 6            | 6            | 6            |     |
| MADM                          | 0.9          | 0.9              | 0.9          | 1.1          | 1.1          |     |
| Agreement                     | High         | High             | High         | High         | Moderate     |     |
|                               | No consensus | No consensus     | No consensus | No consensus | No consensus |     |

|                                                 |                  |                  |                  |              |                  |     |
|-------------------------------------------------|------------------|------------------|------------------|--------------|------------------|-----|
| <b>Round 3</b>                                  |                  |                  |                  |              |                  |     |
| Mean score                                      | 6.8              | 7.8              | 6.8              | 6.4          | 6.0              | 6.8 |
| Median score                                    | 7                | 8                | 7                | 6            | 6                |     |
| MADM                                            | 0.9              | 0.6              | 0.8              | 1.1          | 1.1              |     |
| Agreement                                       | High             | High             | High             | Moderate     | Moderate         |     |
|                                                 | No consensus     | Consensus        | No consensus     | No consensus | No consensus     |     |
| <b>27- Child fruit and vegetable intake</b>     |                  |                  |                  |              |                  |     |
| <b>Round 1</b>                                  |                  |                  |                  |              |                  |     |
| Mean score                                      | 7.3              | <b>7.3</b>       | <b>7.9</b>       | 7.7          | <b>7.2</b>       | 7.5 |
| Median score                                    | 7                | <b>8</b>         | <b>8</b>         | 9            | <b>7</b>         |     |
| MADM                                            | 1.2              | <b>1.1</b>       | <b>1.0</b>       | 1.3          | <b>1.0</b>       |     |
| Agreement                                       | Moderate         | <b>Moderate</b>  | <b>High</b>      | Moderate     | <b>High</b>      |     |
|                                                 | No consensus     | <b>Consensus</b> | <b>Consensus</b> | No consensus | <b>Consensus</b> |     |
| <b>Round 2</b>                                  |                  |                  |                  |              |                  |     |
| Mean score                                      | <b>7.8</b>       | <b>8.4</b>       | <b>8.0</b>       | 8.0          | <b>7.3</b>       | 7.9 |
| Median score                                    | <b>8</b>         | <b>9</b>         | <b>8</b>         | 9            | <b>7</b>         |     |
| MADM                                            | <b>0.8</b>       | <b>0.6</b>       | <b>0.8</b>       | 1.0          | <b>0.8</b>       |     |
| Agreement                                       | <b>High</b>      | <b>High</b>      | <b>High</b>      | High         | <b>High</b>      |     |
|                                                 | <b>Consensus</b> | <b>Consensus</b> | <b>Consensus</b> | No consensus | <b>Consensus</b> |     |
| <b>Round 3</b>                                  |                  |                  |                  |              |                  |     |
| Mean score                                      | <b>7.9</b>       | <b>9.0</b>       | <b>8.2</b>       | 8.0          | <b>7.3</b>       | 8.1 |
| Median score                                    | <b>8</b>         | <b>9</b>         | <b>8</b>         | 9            | <b>7</b>         |     |
| MADM                                            | <b>0.8</b>       | <b>0.0</b>       | <b>0.5</b>       | 1.0          | <b>0.8</b>       |     |
| Agreement                                       | <b>High</b>      | <b>High</b>      | <b>High</b>      | High         | <b>High</b>      |     |
|                                                 | <b>Consensus</b> | <b>Consensus</b> | <b>Consensus</b> | No consensus | <b>Consensus</b> |     |
| <b>28- Child grains; breads; cereals intake</b> |                  |                  |                  |              |                  |     |
| <b>Round 1</b>                                  |                  |                  |                  |              |                  |     |
| Mean score                                      | 6.4              | 6.9              | 7.1              | 6.9          | 6.1              | 6.7 |
| Median score                                    | 6                | 7                | 7                | 7            | 6                |     |

|                                             |              |                  |              |              |              |     |
|---------------------------------------------|--------------|------------------|--------------|--------------|--------------|-----|
| MADM                                        | 1.0          | 1.2              | 1.2          | 1.1          | 1.3          |     |
| Agreement                                   | High         | Moderate         | Moderate     | Moderate     | Moderate     |     |
|                                             | No consensus | No consensus     | No consensus | No consensus | No consensus |     |
| <b>Round 2</b>                              |              |                  |              |              |              |     |
| Mean score                                  | 6.5          | 7.3              | 6.8          | 6.9          | 6.1          | 6.7 |
| Median score                                | 6            | 8                | 7            | 7            | 6            |     |
| MADM                                        | 0.9          | 0.8              | 0.7          | 1.2          | 1.1          |     |
| Agreement                                   | High         | High             | High         | Moderate     | Moderate     |     |
|                                             | No consensus | No consensus     | No consensus | No consensus | No consensus |     |
| <b>Round 3</b>                              |              |                  |              |              |              |     |
| Mean score                                  | 6.6          | <b>7.6</b>       | 6.8          | 7.0          | 5.9          | 6.8 |
| Median score                                | 6            | <b>8</b>         | 7            | 8            | 6            |     |
| MADM                                        | 0.9          | <b>0.4</b>       | 0.8          | 1.4          | 1.1          |     |
| Agreement                                   | High         | <b>High</b>      | High         | Low          | High         |     |
|                                             | No consensus | <b>Consensus</b> | No consensus | No consensus | No consensus |     |
| <b>29- Child meat; poultry; fish intake</b> |              |                  |              |              |              |     |
| <b>Round 1</b>                              |              |                  |              |              |              |     |
| Mean score                                  | 6.3          | 6.3              | 7.1          | 6.7          | 5.9          | 6.5 |
| Median score                                | 6            | 6                | 7            | 6            | 6            |     |
| MADM                                        | 1.0          | 1.7              | 1.4          | 1.3          | 1.3          |     |
| Agreement                                   | High         | Low              | Moderate     | Moderate     | Moderate     |     |
|                                             | No consensus | No consensus     | No consensus | No consensus | No consensus |     |
| <b>Round 2</b>                              |              |                  |              |              |              |     |
| Mean score                                  | 6.4          | 7.3              | 6.8          | 6.8          | 5.8          | 6.6 |
| Median score                                | 6            | 8                | 7            | 7            | 6            |     |
| MADM                                        | 0.9          | 1.3              | 0.6          | 1.5          | 1.2          |     |
| Agreement                                   | High         | Moderate         | High         | Low          | Moderate     |     |
|                                             | No consensus | No consensus     | No consensus | No consensus | No consensus |     |
| <b>Round 3</b>                              |              |                  |              |              |              |     |

|                                            |                  |                  |                  |                  |              |     |
|--------------------------------------------|------------------|------------------|------------------|------------------|--------------|-----|
| Mean score                                 | 6.5              | 7.4              | 7.0              | 7.3              | 5.6          | 6.8 |
| Median score                               | 6                | 8                | 7                | 8                | 5            |     |
| MADM                                       | 0.6              | 1.4              | 1.0              | 1.6              | 1.1          |     |
| Agreement                                  | High             | Moderate         | High             | Low              | Moderate     |     |
|                                            | No consensus     | No consensus     | No consensus     | No consensus     | No consensus |     |
| <b>30- Child non-core food intake</b>      |                  |                  |                  |                  |              |     |
| <b>Round 1</b>                             |                  |                  |                  |                  |              |     |
| Mean score                                 | 7.3              | 6.9              | 7.4              | <b>7.6</b>       | 6.8          | 7.2 |
| Median score                               | 8                | 8                | 8                | <b>8</b>         | 7            |     |
| MADM                                       | 1.4              | 1.7              | 1.2              | <b>1.2</b>       | 1.3          |     |
| Agreement                                  | Low              | Low              | Moderate         | <b>Moderate</b>  | Moderate     |     |
|                                            | No consensus     | No consensus     | No consensus     | <b>Consensus</b> | No consensus |     |
| <b>Round 2</b>                             |                  |                  |                  |                  |              |     |
| Mean score                                 | <b>8.0</b>       | <b>7.8</b>       | 7.3              | <b>7.7</b>       | 7.1          | 7.6 |
| Median score                               | <b>9</b>         | <b>9</b>         | 8                | <b>9</b>         | 7            |     |
| MADM                                       | <b>1.0</b>       | <b>1.2</b>       | 1.3              | <b>1.3</b>       | 1.1          |     |
| Agreement                                  | <b>High</b>      | <b>Moderate</b>  | Moderate         | <b>Moderate</b>  | High         |     |
|                                            | <b>Consensus</b> | <b>Consensus</b> | No consensus     | <b>Consensus</b> | No consensus |     |
| <b>Round 3</b>                             |                  |                  |                  |                  |              |     |
| Mean score                                 | <b>8.0</b>       | 7.7              | <b>7.5</b>       | <b>8.1</b>       | 7.1          | 7.7 |
| Median score                               | <b>9</b>         | 9                | <b>8</b>         | <b>9</b>         | 7            |     |
| MADM                                       | <b>1.0</b>       | 1.3              | <b>0.8</b>       | <b>0.9</b>       | 1.0          |     |
| Agreement                                  | <b>High</b>      | Moderate         | <b>High</b>      | <b>High</b>      | High         |     |
|                                            | <b>Consensus</b> | No consensus     | <b>Consensus</b> | <b>Consensus</b> | No consensus |     |
| <b>31- Child non-core beverages intake</b> |                  |                  |                  |                  |              |     |
| <b>Round 1</b>                             |                  |                  |                  |                  |              |     |
| Mean score                                 | <b>7.9</b>       | <b>7.1</b>       | 7.6              | <b>7.7</b>       | <b>7.3</b>   | 7.5 |
| Median score                               | <b>9</b>         | <b>8</b>         | 8                | <b>8</b>         | <b>7</b>     |     |
| MADM                                       | <b>1.1</b>       | <b>1.5</b>       | 1.2              | <b>1.2</b>       | <b>1.0</b>   |     |

|                                           |                  |                  |                  |                  |                  |     |
|-------------------------------------------|------------------|------------------|------------------|------------------|------------------|-----|
| Agreement                                 | <b>Moderate</b>  | <b>Low</b>       | Moderate         | <b>Moderate</b>  | <b>High</b>      |     |
|                                           | <b>Consensus</b> | <b>Consensus</b> | No consensus     | <b>Consensus</b> | <b>Consensus</b> |     |
| <b>Round 2</b>                            |                  |                  |                  |                  |                  |     |
| Mean score                                | <b>8.5</b>       | <b>8.0</b>       | 7.3              | <b>8.3</b>       | <b>7.5</b>       | 7.9 |
| Median score                              | <b>9</b>         | <b>9</b>         | 8                | <b>9</b>         | <b>8</b>         |     |
| MADM                                      | <b>0.5</b>       | <b>1.0</b>       | 1.3              | <b>0.7</b>       | <b>0.9</b>       |     |
| Agreement                                 | <b>High</b>      | <b>High</b>      | Moderate         | <b>High</b>      | <b>High</b>      |     |
|                                           | <b>Consensus</b> | <b>Consensus</b> | No consensus     | <b>Consensus</b> | <b>Consensus</b> |     |
| <b>Round 3</b>                            |                  |                  |                  |                  |                  |     |
| Mean score                                | <b>8.5</b>       | <b>8.0</b>       | <b>7.5</b>       | <b>8.2</b>       | <b>7.6</b>       | 8.0 |
| Median score                              | <b>9</b>         | <b>9</b>         | <b>8</b>         | <b>9</b>         | <b>7</b>         |     |
| MADM                                      | <b>0.5</b>       | <b>1.0</b>       | <b>0.8</b>       | <b>0.8</b>       | <b>0.9</b>       |     |
| Agreement                                 | <b>High</b>      | <b>High</b>      | <b>High</b>      | <b>High</b>      | <b>High</b>      |     |
|                                           | <b>Consensus</b> | <b>Consensus</b> | <b>Consensus</b> | <b>Consensus</b> | <b>Consensus</b> |     |
| <b>32- Child out of home foods intake</b> |                  |                  |                  |                  |                  |     |
| <b>Round 1</b>                            |                  |                  |                  |                  |                  |     |
| Mean score                                | 7.2              | 6.5              | 6.8              | <b>7.4</b>       | 6.5              | 6.9 |
| Median score                              | 7                | 7                | 7                | <b>7</b>         | 7                |     |
| MADM                                      | 1.3              | 1.4              | 1.0              | <b>0.9</b>       | 1.3              |     |
| Agreement                                 | Moderate         | Low              | High             | <b>High</b>      | Moderate         |     |
|                                           | No consensus     | No consensus     | No consensus     | <b>Consensus</b> | No consensus     |     |
| <b>Round 2</b>                            |                  |                  |                  |                  |                  |     |
| Mean score                                | 7.6              | <b>7.6</b>       | 6.8              | <b>7.6</b>       | 6.8              | 7.3 |
| Median score                              | 8                | <b>7</b>         | 7                | <b>7</b>         | 7                |     |
| MADM                                      | 1.2              | <b>0.8</b>       | 0.4              | <b>0.6</b>       | 0.9              |     |
| Agreement                                 | Moderate         | <b>High</b>      | High             | <b>High</b>      | High             |     |
|                                           | No consensus     | <b>Consensus</b> | No consensus     | <b>Consensus</b> | No consensus     |     |
| <b>Round 3</b>                            |                  |                  |                  |                  |                  |     |
| Mean score                                | <b>7.5</b>       | <b>7.7</b>       | 6.7              | <b>8.0</b>       | 6.7              | 7.3 |

|                                 |                  |                  |              |                  |              |     |
|---------------------------------|------------------|------------------|--------------|------------------|--------------|-----|
| Median score                    | <b>8</b>         | <b>8</b>         | 7            | <b>8</b>         | 7            |     |
| MADM                            | <b>0.9</b>       | <b>1.0</b>       | 0.7          | <b>0.7</b>       | 0.9          |     |
| Agreement                       | <b>High</b>      | <b>High</b>      | High         | <b>High</b>      | High         |     |
|                                 | <b>Consensus</b> | <b>Consensus</b> | No consensus | <b>Consensus</b> | No consensus |     |
| <b>33- Child protein intake</b> |                  |                  |              |                  |              |     |
| <b>Round 1</b>                  |                  |                  |              |                  |              |     |
| Mean score                      | 6.5              | 6.6              | 6.8          | 6.6              | 5.7          | 6.4 |
| Median score                    | 6                | 7                | 7            | 6                | 6            |     |
| MADM                            | 1.0              | 1.3              | 1.2          | 1.1              | 1.4          |     |
| Agreement                       | High             | Moderate         | Moderate     | Moderate         | Low          |     |
|                                 | No consensus     | No consensus     | No consensus | No consensus     | No consensus |     |
| <b>Round 2</b>                  |                  |                  |              |                  |              |     |
| Mean score                      | 6.6              | 7.3              | 6.8          | 6.5              | 5.7          | 6.6 |
| Median score                    | 6                | 8                | 7            | 6                | 6            |     |
| MADM                            | 0.8              | 1.3              | 1.0          | 1.4              | 1.3          |     |
| Agreement                       | High             | Moderate         | High         | Moderate         | Moderate     |     |
|                                 | No consensus     | No consensus     | No consensus | No consensus     | No consensus |     |
| <b>Round 3</b>                  |                  |                  |              |                  |              |     |
| Mean score                      | 6.9              | 7.8              | 7.2          | 6.2              | 5.6          | 6.7 |
| Median score                    | 7                | 8                | 8            | 6                | 5            |     |
| MADM                            | 0.9              | 1.0              | 0.8          | 1.3              | 1.2          |     |
| Agreement                       | High             | High             | High         | Moderate         | Moderate     |     |
|                                 | No consensus     | No consensus     | No consensus | No consensus     | No consensus |     |
| <b>34- Child sodium intake</b>  |                  |                  |              |                  |              |     |
| <b>Round 1</b>                  |                  |                  |              |                  |              |     |
| Mean score                      | 6.4              | 6.7              | 6.4          | 6.5              | 5.6          | 6.3 |
| Median score                    | 7                | 7                | 7            | 6                | 6            |     |
| MADM                            | 1.4              | 1.1              | 1.6          | 1.3              | 1.4          |     |
| Agreement                       | Low              | Moderate         | Low          | Moderate         | Low          |     |

|                                                |                  |                  |                  |                  |              |     |
|------------------------------------------------|------------------|------------------|------------------|------------------|--------------|-----|
|                                                | No consensus     | No consensus     | No consensus     | No consensus     | No consensus |     |
| <b>Round 2</b>                                 |                  |                  |                  |                  |              |     |
| Mean score                                     | 6.5              | <b>7.2</b>       | 5.6              | 6.3              | 5.5          | 6.2 |
| Median score                                   | 7                | <b>7</b>         | 6                | 6                | 6            |     |
| MADM                                           | 1.2              | <b>0.4</b>       | 1.2              | 1.4              | 1.3          |     |
| Agreement                                      | Moderate         | <b>High</b>      | Moderate         | Low              | Moderate     |     |
|                                                | No consensus     | <b>Consensus</b> | No consensus     | No consensus     | No consensus |     |
| <b>Round 3</b>                                 |                  |                  |                  |                  |              |     |
| Mean score                                     | 6.7              | <b>7.6</b>       | 6.3              | 6.9              | 5.4          | 6.6 |
| Median score                                   | 7                | <b>8</b>         | 6                | 7                | 6            |     |
| MADM                                           | 1.1              | <b>0.4</b>       | 0.7              | 1.4              | 1.3          |     |
| Agreement                                      | High             | <b>High</b>      | High             | Low              | Moderate     |     |
|                                                | No consensus     | <b>Consensus</b> | No consensus     | No consensus     | No consensus |     |
| <b>35- Child total and added sugars intake</b> |                  |                  |                  |                  |              |     |
| <b>Round 1</b>                                 |                  |                  |                  |                  |              |     |
| Mean score                                     | <b>7.6</b>       | 7.0              | <b>7.8</b>       | <b>7.8</b>       | 7.2          | 7.5 |
| Median score                                   | <b>8</b>         | 7                | <b>8</b>         | <b>8</b>         | 7            |     |
| MADM                                           | <b>1.1</b>       | 1.2              | <b>1.2</b>       | <b>0.9</b>       | 1.2          |     |
| Agreement                                      | <b>Moderate</b>  | Moderate         | <b>Moderate</b>  | <b>High</b>      | Moderate     |     |
|                                                | <b>Consensus</b> | No consensus     | <b>Consensus</b> | <b>Consensus</b> | No consensus |     |
| <b>Round 2</b>                                 |                  |                  |                  |                  |              |     |
| Mean score                                     | <b>8.2</b>       | 7.8              | 7.3              | <b>8.0</b>       | 7.3          | 7.7 |
| Median score                                   | <b>8</b>         | 8                | 8                | <b>8</b>         | 8            |     |
| MADM                                           | <b>0.7</b>       | 0.9              | 1.1              | <b>0.9</b>       | 1.0          |     |
| Agreement                                      | <b>High</b>      | High             | Moderate         | <b>High</b>      | High         |     |
|                                                | <b>Consensus</b> | Consensus        | No consensus     | <b>Consensus</b> | No consensus |     |
| <b>Round 3</b>                                 |                  |                  |                  |                  |              |     |
| Mean score                                     | <b>8.2</b>       | 8.0              | <b>7.5</b>       | <b>8.0</b>       | 7.3          | 7.8 |
| Median score                                   | <b>9</b>         | 8                | <b>8</b>         | <b>8</b>         | 8            |     |



|                                                |                  |                  |                  |                  |              |     |
|------------------------------------------------|------------------|------------------|------------------|------------------|--------------|-----|
| MADM                                           | <b>0.8</b>       | 0.8              | <b>0.5</b>       | <b>0.9</b>       | 1.1          |     |
| Agreement                                      | <b>High</b>      | High             | <b>High</b>      | <b>High</b>      | Moderate     |     |
|                                                | <b>Consensus</b> | No consensus     | <b>Consensus</b> | <b>Consensus</b> | No consensus |     |
| <b>36- Child desire for drinks</b>             |                  |                  |                  |                  |              |     |
| <b>Round 1</b>                                 |                  |                  |                  |                  |              |     |
| Mean score                                     | 6.7              | 6.8              | 6.5              | 5.7              | 5.6          | 6.3 |
| Median score                                   | 7                | 7                | 7                | 6                | 6            |     |
| MADM                                           | 1.6              | 1.3              | 1.6              | 1.5              | 1.6          |     |
| Agreement                                      | Low              | Moderate         | Low              | Low              | Low          |     |
|                                                | No consensus     | No consensus     | No consensus     | No consensus     | No consensus |     |
| <b>Round 2</b>                                 |                  |                  |                  |                  |              |     |
| Mean score                                     | 6.8              | 7.6              | 5.8              | 6.1              | 5.5          | 6.4 |
| Median score                                   | 7                | 8                | 6                | 6                | 6            |     |
| MADM                                           | 1.2              | 0.9              | 2.0              | 1.2              | 1.6          |     |
| Agreement                                      | Moderate         | High             | Low              | Moderate         | Low          |     |
|                                                | No consensus     | No consensus     | No consensus     | No consensus     | No consensus |     |
| <b>Round 3</b>                                 |                  |                  |                  |                  |              |     |
| Mean score                                     | 6.9              | <b>7.8</b>       | 6.2              | 6.3              | 5.4          | 6.5 |
| Median score                                   | 7                | <b>8</b>         | 6                | 6                | 6            |     |
| MADM                                           | 1.2              | <b>0.6</b>       | 1.5              | 1.4              | 1.6          |     |
| Agreement                                      | Moderate         | <b>High</b>      | Low              | Low              | Low          |     |
|                                                | No consensus     | <b>Consensus</b> | No consensus     | No consensus     | No consensus |     |
| <b>37- Child eating in response to emotion</b> |                  |                  |                  |                  |              |     |
| <b>Round 1</b>                                 |                  |                  |                  |                  |              |     |
| Mean score                                     | 7.3              | 7.1              | 7.1              | 6.4              | 6.2          | 6.8 |
| Median score                                   | 7                | 7                | 7                | 6                | 6            |     |
| MADM                                           | 1.4              | 1.2              | 1.5              | 1.6              | 1.3          |     |
| Agreement                                      | Moderate         | Moderate         | Low              | Low              | Moderate     |     |
|                                                | No consensus     | No consensus     | No consensus     | No consensus     | No consensus |     |

| <b>Round 2</b>                     |                  |                  |                  |              |              |     |
|------------------------------------|------------------|------------------|------------------|--------------|--------------|-----|
| Mean score                         | 7.6              | 7.7              | 7.0              | 6.8          | 6.2          | 7.0 |
| Median score                       | 8                | 8                | 7                | 7            | 6            |     |
| MADM                               | 1.1              | 0.8              | 1.0              | 1.5          | 1.0          |     |
| Agreement                          | Moderate         | High             | High             | Low          | High         |     |
|                                    | No consensus     | No consensus     | No consensus     | No consensus | No consensus |     |
| <b>Round 3</b>                     |                  |                  |                  |              |              |     |
| Mean score                         | <b>8.0</b>       | <b>7.7</b>       | 7.2              | 7.3          | 6.2          | 7.3 |
| Median score                       | <b>9</b>         | <b>8</b>         | 7                | 8            | 6            |     |
| MADM                               | <b>1.0</b>       | <b>0.7</b>       | 0.8              | 1.3          | 1.0          |     |
| Agreement                          | <b>High</b>      | <b>High</b>      | High             | Moderate     | High         |     |
|                                    | <b>Consensus</b> | <b>Consensus</b> | No consensus     | No consensus | No consensus |     |
| <b>38- Child enjoyment of food</b> |                  |                  |                  |              |              |     |
| <b>Round 1</b>                     |                  |                  |                  |              |              |     |
| Mean score                         | 6.7              | 6.8              | <b>7.2</b>       | 6.5          | 6.0          | 6.6 |
| Median score                       | 7                | 7                | <b>7</b>         | 7            | 6            |     |
| MADM                               | 1.4              | 1.3              | <b>0.9</b>       | 1.9          | 1.4          |     |
| Agreement                          | Low              | Moderate         | <b>High</b>      | Low          | Low          |     |
|                                    | No consensus     | No consensus     | <b>Consensus</b> | No consensus | No consensus |     |
| <b>Round 2</b>                     |                  |                  |                  |              |              |     |
| Mean score                         | 6.9              | <b>7.6</b>       | 6.7              | 6.9          | 6.0          | 6.8 |
| Median score                       | 7                | <b>8</b>         | 7                | 7            | 6            |     |
| MADM                               | 1.4              | <b>1.0</b>       | 0.9              | 1.4          | 1.2          |     |
| Agreement                          | Moderate         | <b>High</b>      | High             | Low          | Moderate     |     |
|                                    | No consensus     | <b>Consensus</b> | No consensus     | No consensus | No consensus |     |
| <b>Round 3</b>                     |                  |                  |                  |              |              |     |
| Mean score                         | 6.9              | <b>8.3</b>       | 7.3              | 7.0          | 6.0          | 7.1 |
| Median score                       | 6                | <b>8</b>         | 8                | 8            | 6            |     |
| MADM                               | 1.3              | <b>0.3</b>       | 1.0              | 1.7          | 1.1          |     |

|                                 |                  |                  |                  |                  |              |     |
|---------------------------------|------------------|------------------|------------------|------------------|--------------|-----|
| Agreement                       | Moderate         | High             | High             | Low              | Moderate     |     |
|                                 | No consensus     | Consensus        | No consensus     | No consensus     | No consensus |     |
| <b>39- Child meal patterns</b>  |                  |                  |                  |                  |              |     |
| <b>Round 1</b>                  |                  |                  |                  |                  |              |     |
| Mean score                      | 7.3              | 7.0              | <b>7.2</b>       | 7.1              | 6.8          | 7.1 |
| Median score                    | 7                | 7                | <b>8</b>         | 7                | 7            |     |
| MADM                            | 1.1              | 1.1              | <b>1.3</b>       | 1.4              | 1.2          |     |
| Agreement                       | Moderate         | Moderate         | <b>Moderate</b>  | Moderate         | Moderate     |     |
|                                 | No consensus     | No consensus     | <b>Consensus</b> | No consensus     | No consensus |     |
| <b>Round 2</b>                  |                  |                  |                  |                  |              |     |
| Mean score                      | <b>7.6</b>       | <b>7.6</b>       | 6.7              | <b>7.3</b>       | 6.9          | 7.2 |
| Median score                    | <b>7</b>         | <b>8</b>         | 7                | <b>7</b>         | 7            |     |
| MADM                            | <b>0.9</b>       | <b>0.9</b>       | 1.1              | <b>1.0</b>       | 0.9          |     |
| Agreement                       | <b>High</b>      | <b>High</b>      | Moderate         | <b>High</b>      | High         |     |
|                                 | <b>Consensus</b> | <b>Consensus</b> | No consensus     | <b>Consensus</b> | No consensus |     |
| <b>Round 3</b>                  |                  |                  |                  |                  |              |     |
| Mean score                      | <b>7.3</b>       | <b>8.0</b>       | <b>7.3</b>       | <b>7.6</b>       | 6.9          | 7.4 |
| Median score                    | <b>7</b>         | <b>8</b>         | <b>8</b>         | <b>8</b>         | 7            |     |
| MADM                            | <b>0.9</b>       | <b>0.4</b>       | <b>0.7</b>       | <b>0.9</b>       | 0.9          |     |
| Agreement                       | <b>High</b>      | <b>High</b>      | <b>High</b>      | <b>High</b>      | High         |     |
|                                 | <b>Consensus</b> | <b>Consensus</b> | <b>Consensus</b> | <b>Consensus</b> | No consensus |     |
| <b>40- Child food neophobia</b> |                  |                  |                  |                  |              |     |
| <b>Round 1</b>                  |                  |                  |                  |                  |              |     |
| Mean score                      | 6.8              | 6.4              | 6.6              | 5.4              | 5.8          | 6.2 |
| Median score                    | 7                | 7                | 7                | 5                | 6            |     |
| MADM                            | 1.7              | 1.5              | 1.2              | 1.4              | 1.3          |     |
| Agreement                       | Low              | Low              | Moderate         | Moderate         | Moderate     |     |
|                                 | No consensus     | No consensus     | No consensus     | No consensus     | No consensus |     |
| <b>Round 2</b>                  |                  |                  |                  |                  |              |     |

|                                         |                  |                  |                  |              |              |     |
|-----------------------------------------|------------------|------------------|------------------|--------------|--------------|-----|
| Mean score                              | 7.3              | 7.2              | <b>7.2</b>       | 5.7          | 5.8          | 6.6 |
| Median score                            | 7                | 7                | <b>7</b>         | 5            | 6            |     |
| MADM                                    | 1.2              | 0.9              | <b>1.0</b>       | 1.0          | 1.2          |     |
| Agreement                               | Moderate         | High             | <b>High</b>      | High         | Moderate     |     |
|                                         | No consensus     | No consensus     | <b>Consensus</b> | No consensus | No consensus |     |
| <b>Round 3</b>                          |                  |                  |                  |              |              |     |
| Mean score                              | 7.4              | <b>7.5</b>       | 7.4              | 6.3          | 5.6          | 6.8 |
| Median score                            | 8                | <b>8</b>         | 7                | 6            | 6            |     |
| MADM                                    | 1.3              | <b>0.5</b>       | 1.2              | 1.1          | 1.2          |     |
| Agreement                               | Moderate         | <b>High</b>      | Moderate         | Moderate     | Moderate     |     |
|                                         | No consensus     | <b>Consensus</b> | No consensus     | No consensus | No consensus |     |
| <b>41- Child satiety responsiveness</b> |                  |                  |                  |              |              |     |
| <b>Round 1</b>                          |                  |                  |                  |              |              |     |
| Mean score                              | 6.7              | 7.2              | 7.2              | 6.3          | 6.3          | 6.8 |
| Median score                            | 7                | 8                | 7                | 6            | 6            |     |
| MADM                                    | 1.4              | 1.3              | 1.2              | 1.5          | 1.3          |     |
| Agreement                               | Moderate         | Moderate         | Moderate         | Low          | Moderate     |     |
|                                         | No consensus     | No consensus     | No consensus     | No consensus | No consensus |     |
| <b>Round 2</b>                          |                  |                  |                  |              |              |     |
| Mean score                              | <b>7.5</b>       | 7.9              | 7.1              | 6.8          | 6.6          | 7.2 |
| Median score                            | <b>7</b>         | 9                | 7                | 7            | 7            |     |
| MADM                                    | <b>1.1</b>       | 1.1              | 1.1              | 0.9          | 1.1          |     |
| Agreement                               | <b>Moderate</b>  | Moderate         | Moderate         | High         | Moderate     |     |
|                                         | <b>Consensus</b> | No consensus     | No consensus     | No consensus | No consensus |     |
| <b>Round 3</b>                          |                  |                  |                  |              |              |     |
| Mean score                              | <b>7.8</b>       | <b>8.4</b>       | <b>7.5</b>       | 7.0          | 6.5          | 7.4 |
| Median score                            | <b>9</b>         | <b>9</b>         | <b>7</b>         | 7            | 6            |     |
| MADM                                    | <b>1.2</b>       | <b>0.6</b>       | <b>0.8</b>       | 0.9          | 1.1          |     |
| Agreement                               | <b>Moderate</b>  | <b>High</b>      | <b>High</b>      | High         | High         |     |

|                                                        | Consensus    | Consensus    | Consensus    | No consensus | No consensus |     |
|--------------------------------------------------------|--------------|--------------|--------------|--------------|--------------|-----|
| <b>42- Child slowness in eating</b>                    |              |              |              |              |              |     |
| <b>Round 1</b>                                         |              |              |              |              |              |     |
| Mean score                                             | 5.6          | 5.4          | 6.1          | 5.5          | 5.2          | 5.6 |
| Median score                                           | 6            | 5            | 6            | 6            | 5            |     |
| MADM                                                   | 1.6          | 1.6          | 1.3          | 1.4          | 1.5          |     |
| Agreement                                              | Low          | Low          | Moderate     | Moderate     | Low          |     |
|                                                        | No consensus | No consensus | No consensus | No consensus | No consensus |     |
| <b>Round 2</b>                                         |              |              |              |              |              |     |
| Mean score                                             | 5.5          | 6.7          | 5.5          | 5.6          | 5.1          | 5.7 |
| Median score                                           | 6            | 7            | 5            | 5            | 5            |     |
| MADM                                                   | 0.9          | 1.2          | 0.8          | 1.1          | 1.5          |     |
| Agreement                                              | High         | Moderate     | High         | High         | Low          |     |
|                                                        | No consensus | No consensus | No consensus | No consensus | No consensus |     |
| <b>Round 3</b>                                         |              |              |              |              |              |     |
| Mean score                                             | 5.5          | 7.2          | 5.7          | 5.6          | 4.8          | 5.7 |
| Median score                                           | 6            | 7            | 5            | 5            | 5            |     |
| MADM                                                   | 1.2          | 1.2          | 0.7          | 1.4          | 1.4          |     |
| Agreement                                              | Moderate     | Moderate     | High         | Low          | Moderate     |     |
|                                                        | No consensus | No consensus | No consensus | No consensus | No consensus |     |
| <b>43- Parent/caregiver weight based anthropometry</b> |              |              |              |              |              |     |
| <b>Round 1</b>                                         |              |              |              |              |              |     |
| Mean score                                             | 6.5          | 6.4          | 6.6          | 6.6          | 7.0          | 6.6 |
| Median score                                           | 7            | 6            | 7            | 7            | 7            |     |
| MADM                                                   | 1.2          | 1.5          | 1.2          | 1.1          | 1.2          |     |
| Agreement                                              | Moderate     | Low          | Moderate     | Moderate     | Moderate     |     |
|                                                        | No consensus | No consensus | No consensus | No consensus | No consensus |     |
| <b>Round 2</b>                                         |              |              |              |              |              |     |
| Mean score                                             | 6.9          | 6.4          | 6.5          | 6.9          | 7.0          | 6.7 |

|                                                            |                  |                  |                  |              |              |     |
|------------------------------------------------------------|------------------|------------------|------------------|--------------|--------------|-----|
| Median score                                               | 7                | 7                | 7                | 7            | 7            |     |
| MADM                                                       | 0.7              | 0.9              | 1.0              | 1.0          | 0.9          |     |
| Agreement                                                  | High             | High             | High             | High         | High         |     |
|                                                            | No consensus     | No consensus     | No consensus     | No consensus | No consensus |     |
| <b>Round 3</b>                                             |                  |                  |                  |              |              |     |
| Mean score                                                 | 7.1              | 6.8              | 6.8              | 6.8          | 7.1          | 6.9 |
| Median score                                               | 7                | 7                | 7                | 7            | 7            |     |
| MADM                                                       | 0.8              | 0.5              | 0.6              | 0.7          | 0.8          |     |
| Agreement                                                  | High             | High             | High             | High         | High         |     |
|                                                            | No consensus     | Consensus        | No consensus     | No consensus | No consensus |     |
| <b>44- Parent/caregiver screen time parenting practice</b> |                  |                  |                  |              |              |     |
| <b>Round 1</b>                                             |                  |                  |                  |              |              |     |
| Mean score                                                 | <b>7.3</b>       | 6.6              | <b>6.9</b>       | 6.5          | 6.4          | 6.7 |
| Median score                                               | <b>7</b>         | 7                | <b>7</b>         | 7            | 7            |     |
| MADM                                                       | <b>1.0</b>       | 1.5              | <b>0.8</b>       | 1.5          | 1.1          |     |
| Agreement                                                  | <b>High</b>      | Low              | <b>High</b>      | Low          | Moderate     |     |
|                                                            | <b>Consensus</b> | No consensus     | <b>Consensus</b> | No consensus | No consensus |     |
| <b>Round 2</b>                                             |                  |                  |                  |              |              |     |
| Mean score                                                 | <b>7.5</b>       | 7.6              | <b>7.0</b>       | 6.4          | 6.7          | 7.0 |
| Median score                                               | <b>8</b>         | 8                | <b>7</b>         | 7            | 7            |     |
| MADM                                                       | <b>0.8</b>       | 1.1              | <b>0.7</b>       | 1.4          | 1.1          |     |
| Agreement                                                  | <b>High</b>      | Moderate         | <b>High</b>      | Moderate     | Moderate     |     |
|                                                            | <b>Consensus</b> | No consensus     | <b>Consensus</b> | No consensus | No consensus |     |
| <b>Round 3</b>                                             |                  |                  |                  |              |              |     |
| Mean score                                                 | 7.2              | <b>8.2</b>       | <b>7.6</b>       | 6.9          | 6.9          | 7.4 |
| Median score                                               | 8                | <b>8</b>         | <b>8</b>         | 7            | 7            |     |
| MADM                                                       | 1.1              | <b>0.5</b>       | <b>0.4</b>       | 1.2          | 1.0          |     |
| Agreement                                                  | High             | <b>High</b>      | <b>High</b>      | Moderate     | High         |     |
|                                                            | No consensus     | <b>Consensus</b> | <b>Consensus</b> | No consensus | No consensus |     |

| <b>45- Parent/caregiver role modelling of sedentary behaviours</b> |           |           |           |              |              |     |
|--------------------------------------------------------------------|-----------|-----------|-----------|--------------|--------------|-----|
| <b>Round 1</b>                                                     |           |           |           |              |              |     |
| Mean score                                                         | 7.6       | 7.2       | 7.5       | 6.9          | 6.6          | 7.2 |
| Median score                                                       | 8         | 8         | 8         | 7            | 7            |     |
| MADM                                                               | 0.9       | 1.0       | 0.9       | 1.4          | 1.2          |     |
| Agreement                                                          | High      | High      | High      | Moderate     | Moderate     |     |
|                                                                    | Consensus | Consensus | Consensus | No consensus | No consensus |     |
| <b>Round 2</b>                                                     |           |           |           |              |              |     |
| Mean score                                                         | 7.8       | 7.3       | 7.6       | 6.5          | 6.8          | 7.2 |
| Median score                                                       | 8         | 8         | 8         | 7            | 7            |     |
| MADM                                                               | 0.7       | 1.1       | 0.4       | 1.2          | 1.1          |     |
| Agreement                                                          | High      | Moderate  | High      | Moderate     | High         |     |
|                                                                    | Consensus | Consensus | Consensus | No consensus | No consensus |     |
| <b>Round 3</b>                                                     |           |           |           |              |              |     |
| Mean score                                                         | 7.8       | 8.3       | 7.4       | 6.6          | 7.0          | 7.4 |
| Median score                                                       | 8         | 8         | 7         | 7            | 7            |     |
| MADM                                                               | 1.0       | 0.2       | 0.4       | 1.1          | 0.9          |     |
| Agreement                                                          | High      | High      | High      | Moderate     | High         |     |
|                                                                    | Consensus | Consensus | Consensus | No consensus | No consensus |     |
| <b>46- Parent/caregiver role modelling of physical activity</b>    |           |           |           |              |              |     |
| <b>Round 1</b>                                                     |           |           |           |              |              |     |
| Mean score                                                         | 7.7       | 7.4       | 7.6       | 6.9          | 6.9          | 7.3 |
| Median score                                                       | 8         | 8         | 8         | 7            | 7            |     |
| MADM                                                               | 0.9       | 1.1       | 0.7       | 1.3          | 1.1          |     |
| Agreement                                                          | High      | High      | High      | Moderate     | Moderate     |     |
|                                                                    | Consensus | Consensus | Consensus | No consensus | No consensus |     |
| <b>Round 2</b>                                                     |           |           |           |              |              |     |
| Mean score                                                         | 7.8       | 7.3       | 7.7       | 7.1          | 7.0          | 7.4 |
| Median score                                                       | 8         | 8         | 8         | 8            | 7            |     |

|                                                                |           |           |           |              |              |     |
|----------------------------------------------------------------|-----------|-----------|-----------|--------------|--------------|-----|
| MADM                                                           | 0.8       | 1.1       | 0.3       | 1.1          | 0.9          |     |
| Agreement                                                      | High      | Moderate  | High      | High         | High         |     |
|                                                                | Consensus | Consensus | Consensus | No consensus | Consensus    |     |
| <b>Round 3</b>                                                 |           |           |           |              |              |     |
| Mean score                                                     | 7.8       | 8.1       | 8.2       | 7.3          | 7.2          | 7.7 |
| Median score                                                   | 8         | 8         | 8         | 8            | 7            |     |
| MADM                                                           | 1.1       | 0.3       | 0.2       | 1.1          | 0.7          |     |
| Agreement                                                      | Moderate  | High      | High      | Moderate     | High         |     |
|                                                                | Consensus | Consensus | Consensus | No consensus | Consensus    |     |
| <b>47- Parent/caregiver role modelling of healthy eating</b>   |           |           |           |              |              |     |
| <b>Round 1</b>                                                 |           |           |           |              |              |     |
| Mean score                                                     | 8.1       | 7.7       | 7.9       | 7.1          | 7.0          | 7.6 |
| Median score                                                   | 9         | 8         | 8         | 7            | 7            |     |
| MADM                                                           | 0.9       | 0.7       | 0.6       | 1.2          | 1.0          |     |
| Agreement                                                      | High      | High      | High      | Moderate     | High         |     |
|                                                                | Consensus | Consensus | Consensus | No consensus | No consensus |     |
| <b>Round 2</b>                                                 |           |           |           |              |              |     |
| Mean score                                                     | 8.4       | 7.7       | 8.2       | 7.3          | 7.3          | 7.8 |
| Median score                                                   | 9         | 8         | 8         | 8            | 7            |     |
| MADM                                                           | 0.6       | 0.7       | 0.5       | 1.0          | 0.9          |     |
| Agreement                                                      | High      | High      | High      | High         | High         |     |
|                                                                | Consensus | Consensus | Consensus | Consensus    | Consensus    |     |
| <b>Round 3</b>                                                 |           |           |           |              |              |     |
| Mean score                                                     | 8.4       | 8.3       | 8.6       | 7.8          | 7.5          | 8.1 |
| Median score                                                   | 9         | 8         | 9         | 8            | 7            |     |
| MADM                                                           | 0.6       | 0.2       | 0.4       | 0.9          | 0.9          |     |
| Agreement                                                      | High      | High      | High      | High         | High         |     |
|                                                                | Consensus | Consensus | Consensus | Consensus    | Consensus    |     |
| <b>48- Parent/caregiver encouragement of physical activity</b> |           |           |           |              |              |     |



| <b>Round 1</b>                                                    |           |           |           |              |              |     |
|-------------------------------------------------------------------|-----------|-----------|-----------|--------------|--------------|-----|
| Mean score                                                        | 7.6       | 7.6       | 7.5       | 6.8          | 6.6          | 7.2 |
| Median score                                                      | 7         | 8         | 8         | 7            | 7            |     |
| MADM                                                              | 1.0       | 0.7       | 0.9       | 1.7          | 1.1          |     |
| Agreement                                                         | High      | High      | High      | Low          | Moderate     |     |
|                                                                   | Consensus | Consensus | Consensus | No consensus | No consensus |     |
| <b>Round 2</b>                                                    |           |           |           |              |              |     |
| Mean score                                                        | 7.6       | 7.6       | 7.5       | 7.4          | 6.8          | 7.4 |
| Median score                                                      | 8         | 8         | 8         | 8            | 7            |     |
| MADM                                                              | 0.9       | 0.8       | 0.6       | 1.4          | 1.0          |     |
| Agreement                                                         | High      | High      | High      | Moderate     | High         |     |
|                                                                   | Consensus | Consensus | Consensus | No consensus | No consensus |     |
| <b>Round 3</b>                                                    |           |           |           |              |              |     |
| Mean score                                                        | 7.8       | 8.3       | 7.8       | 7.7          | 6.9          | 7.7 |
| Median score                                                      | 8         | 8         | 8         | 8            | 7            |     |
| MADM                                                              | 0.8       | 0.2       | 1.0       | 1.0          | 0.7          |     |
| Agreement                                                         | High      | High      | High      | High         | High         |     |
|                                                                   | Consensus | Consensus | Consensus | No consensus | Consensus    |     |
| <b>49- Parent/caregiver co-participation in physical activity</b> |           |           |           |              |              |     |
| <b>Round 1</b>                                                    |           |           |           |              |              |     |
| Mean score                                                        | 7.3       | 7.5       | 7.5       | 6.7          | 6.6          | 7.1 |
| Median score                                                      | 7         | 8         | 8         | 7            | 7            |     |
| MADM                                                              | 1.1       | 1.1       | 1.1       | 1.4          | 1.1          |     |
| Agreement                                                         | Moderate  | Moderate  | Moderate  | Low          | Moderate     |     |
|                                                                   | Consensus | Consensus | Consensus | No consensus | No consensus |     |
| <b>Round 2</b>                                                    |           |           |           |              |              |     |
| Mean score                                                        | 7.5       | 7.7       | 7.5       | 6.9          | 6.8          | 7.3 |
| Median score                                                      | 8         | 8         | 8         | 7            | 7            |     |
| MADM                                                              | 1.1       | 0.9       | 1.1       | 0.9          | 1.0          |     |

|                                                                  |              |              |              |              |              |     |
|------------------------------------------------------------------|--------------|--------------|--------------|--------------|--------------|-----|
| Agreement                                                        | Moderate     | High         | Moderate     | High         | High         |     |
|                                                                  | Consensus    | Consensus    | No consensus | No consensus | No consensus |     |
| <b>Round 3</b>                                                   |              |              |              |              |              |     |
| Mean score                                                       | 7.5          | 8.3          | 8.0          | 7.3          | 6.9          | 7.6 |
| Median score                                                     | 8            | 8            | 8            | 8            | 7            |     |
| MADM                                                             | 1.1          | 0.2          | 0.8          | 0.9          | 1.0          |     |
| Agreement                                                        | High         | High         | High         | High         | High         |     |
|                                                                  | Consensus    | Consensus    | Consensus    | No consensus | No consensus |     |
| <b>50- Parent/caregiver physical activity parenting practice</b> |              |              |              |              |              |     |
| <b>Round 1</b>                                                   |              |              |              |              |              |     |
| Mean score                                                       | 7.11627907   | 7.105263158  | 7.235294118  | 6.578947368  | 6.481012658  | 6.9 |
| Median score                                                     | 7            | 8            | 8            | 7            | 7            |     |
| MADM                                                             | 1.23255814   | 1.105263158  | 1.117647059  | 1.368421053  | 1.17721519   |     |
| Agreement                                                        | Moderate     | Moderate     | Moderate     | Moderate     | Moderate     |     |
|                                                                  | No consensus | No consensus | Consensus    | No consensus | No consensus |     |
| <b>Round 2</b>                                                   |              |              |              |              |              |     |
| Mean score                                                       | 7.4          | 7.4          | 7.5          | 6.9          | 6.6          | 7.2 |
| Median score                                                     | 7            | 8            | 8            | 7            | 7            |     |
| MADM                                                             | 1.0          | 1.0          | 0.5          | 1.2          | 1.2          |     |
| Agreement                                                        | High         | High         | High         | Moderate     | Moderate     |     |
|                                                                  | No consensus | Consensus    | Consensus    | No consensus | No consensus |     |
| <b>Round 3</b>                                                   |              |              |              |              |              |     |
| Mean score                                                       | 7.3          | 8.0          | 7.6          | 7.3          | 6.7          | 7.4 |
| Median score                                                     | 7            | 8            | 8            | 8            | 7            |     |
| MADM                                                             | 1.1          | 0.5          | 0.4          | 1.1          | 1.0          |     |
| Agreement                                                        | High         | High         | High         | Moderate     | High         |     |
|                                                                  | Consensus    | Consensus    | Consensus    | No consensus | No consensus |     |
| <b>51- Parent/caregiver sleep parenting practice</b>             |              |              |              |              |              |     |
| <b>Round 1</b>                                                   |              |              |              |              |              |     |

|                                                            |              |              |              |              |              |     |
|------------------------------------------------------------|--------------|--------------|--------------|--------------|--------------|-----|
| Mean score                                                 | 6.6          | 6.9          | 6.4          | 5.8          | 6.1          | 6.4 |
| Median score                                               | 7            | 7            | 7            | 6            | 6            |     |
| MADM                                                       | 1.1          | 1.2          | 1.3          | 2.2          | 1.2          |     |
| Agreement                                                  | Moderate     | Moderate     | Moderate     | Low          | Moderate     |     |
|                                                            | No consensus | No consensus | No consensus | No consensus | No consensus |     |
| <b>Round 2</b>                                             |              |              |              |              |              |     |
| Mean score                                                 | 6.5          | 7.5          | 6.4          | 6.2          | 6.1          | 6.5 |
| Median score                                               | 6            | 8            | 7            | 7            | 6            |     |
| MADM                                                       | 1.1          | 0.8          | 0.8          | 1.7          | 1.0          |     |
| Agreement                                                  | Moderate     | High         | High         | Low          | High         |     |
|                                                            | No consensus | No consensus | No consensus | No consensus | No consensus |     |
| <b>Round 3</b>                                             |              |              |              |              |              |     |
| Mean score                                                 | 6.7          | 7.8          | 7.2          | 6.8          | 6.3          | 7.0 |
| Median score                                               | 7            | 8            | 7            | 7            | 6            |     |
| MADM                                                       | 0.9          | 0.5          | 1.0          | 1.5          | 0.9          |     |
| Agreement                                                  | High         | High         | High         | Low          | High         |     |
|                                                            | No consensus | No consensus | No consensus | No consensus | No consensus |     |
| <b>52- Parent/caregiver daytime dysfunction or fatigue</b> |              |              |              |              |              |     |
| <b>Round 1</b>                                             |              |              |              |              |              |     |
| Mean score                                                 | 6.7          | 7.0          | 5.7          | 5.2          | 5.3          | 6.0 |
| Median score                                               | 7            | 7            | 5            | 4            | 6            |     |
| MADM                                                       | 1.2          | 1.2          | 2.0          | 2.2          | 1.4          |     |
| Agreement                                                  | Moderate     | Moderate     | Low          | Low          | Moderate     |     |
|                                                            | No consensus | No consensus | No consensus | No consensus | No consensus |     |
| <b>Round 2</b>                                             |              |              |              |              |              |     |
| Mean score                                                 | 6.7          | 7.3          | 6.1          | 5.3          | 5.3          | 6.1 |
| Median score                                               | 7            | 8            | 6            | 6            | 6            |     |
| MADM                                                       | 1.2          | 1.0          | 1.5          | 1.3          | 1.4          |     |
| Agreement                                                  | Moderate     | High         | Low          | Moderate     | Moderate     |     |

|                                                           |                  |                  |                  |              |              |     |
|-----------------------------------------------------------|------------------|------------------|------------------|--------------|--------------|-----|
|                                                           | No consensus     | No consensus     | No consensus     | No consensus | No consensus |     |
| <b>Round 3</b>                                            |                  |                  |                  |              |              |     |
| Mean score                                                | 6.7              | 7.7              | 7.0              | 6.0          | 5.2          | 6.5 |
| Median score                                              | 7                | 8                | 7                | 6            | 6            |     |
| MADM                                                      | 1.1              | 0.7              | 1.2              | 0.8          | 1.4          |     |
| Agreement                                                 | Moderate         | High             | Moderate         | High         | Moderate     |     |
|                                                           | No consensus     | No consensus     | No consensus     | No consensus | No consensus |     |
| <b>53- Parent/caregiver nutrition parenting practices</b> |                  |                  |                  |              |              |     |
| <b>Round 1</b>                                            |                  |                  |                  |              |              |     |
| Mean score                                                | <b>7.7</b>       | 7.2              | <b>7.8</b>       | 6.9          | 6.7          | 7.3 |
| Median score                                              | <b>8</b>         | 8                | <b>8</b>         | 7            | 7            |     |
| MADM                                                      | <b>1.0</b>       | 1.0              | <b>0.9</b>       | 1.5          | 1.1          |     |
| Agreement                                                 | <b>High</b>      | High             | <b>High</b>      | Low          | Moderate     |     |
|                                                           | <b>Consensus</b> | No consensus     | <b>Consensus</b> | No consensus | No consensus |     |
| <b>Round 2</b>                                            |                  |                  |                  |              |              |     |
| Mean score                                                | <b>7.8</b>       | <b>7.6</b>       | <b>7.4</b>       | 7.1          | 6.9          | 7.4 |
| Median score                                              | <b>8</b>         | <b>8</b>         | <b>7</b>         | 7            | 7            |     |
| MADM                                                      | <b>0.7</b>       | <b>0.8</b>       | <b>0.7</b>       | 1.2          | 0.8          |     |
| Agreement                                                 | <b>High</b>      | <b>High</b>      | <b>High</b>      | Moderate     | High         |     |
|                                                           | <b>Consensus</b> | <b>Consensus</b> | <b>Consensus</b> | No consensus | No consensus |     |
| <b>Round 3</b>                                            |                  |                  |                  |              |              |     |
| Mean score                                                | <b>8.2</b>       | <b>7.9</b>       | <b>8.0</b>       | 7.3          | 7.1          | 7.7 |
| Median score                                              | <b>8</b>         | <b>8</b>         | <b>9</b>         | 8            | 7            |     |
| MADM                                                      | <b>0.7</b>       | <b>0.7</b>       | <b>1.0</b>       | 1.1          | 0.8          |     |
| Agreement                                                 | <b>High</b>      | <b>High</b>      | <b>High</b>      | Moderate     | High         |     |
|                                                           | <b>Consensus</b> | <b>Consensus</b> | <b>Consensus</b> | No consensus | No consensus |     |
| <b>54- Parent/caregiver's dietary intentions</b>          |                  |                  |                  |              |              |     |
| <b>Round 1</b>                                            |                  |                  |                  |              |              |     |
| Mean score                                                | 7.4              | 7.3              | 6.8              | 5.5          | 5.8          | 6.6 |

|                                          |                  |                  |                  |              |              |     |
|------------------------------------------|------------------|------------------|------------------|--------------|--------------|-----|
| Median score                             | 7.5              | 8.0              | 7.0              | 6.0          | 6.0          |     |
| MADM                                     | 1.2              | 0.9              | 1.4              | 1.6          | 1.4          |     |
| Agreement                                | Moderate         | High             | Low              | Low          | Moderate     |     |
|                                          | No consensus     | No consensus     | No consensus     | No consensus | No consensus |     |
| <b>Round 2</b>                           |                  |                  |                  |              |              |     |
| Mean score                               | 7.2              | 7.2              | 6.2              | 6.4          | 5.8          | 6.6 |
| Median score                             | 7.0              | 7.0              | 6.0              | 7.0          | 6.0          |     |
| MADM                                     | 1.1              | 1.0              | 1.4              | 1.1          | 1.3          |     |
| Agreement                                | Moderate         | High             | Moderate         | High         | Moderate     |     |
|                                          | No consensus     | No consensus     | No consensus     | No consensus | No consensus |     |
| <b>Round 3</b>                           |                  |                  |                  |              |              |     |
| Mean score                               | 7.4              | 7.6              | 7.6              | 6.7          | 5.9          | 7.0 |
| Median score                             | 8.0              | 8.0              | 8.0              | 7.0          | 6.0          |     |
| MADM                                     | 1.3              | 1.0              | 1.2              | 1.0          | 1.2          |     |
| Agreement                                | Moderate         | High             | Moderate         | High         | Moderate     |     |
|                                          | No consensus     | No consensus     | No consensus     | No consensus | No consensus |     |
| <b>55- Parent/caregiver food variety</b> |                  |                  |                  |              |              |     |
| <b>Round 1</b>                           |                  |                  |                  |              |              |     |
| Mean score                               | 7.3              | 7.3              | <b>7.2</b>       | 6.3          | 6.3          | 6.9 |
| Median score                             | 7.0              | 8.0              | <b>7.0</b>       | 6.0          | 6.0          |     |
| MADM                                     | 1.2              | 1.1              | <b>1.1</b>       | 1.4          | 1.1          |     |
| Agreement                                | Moderate         | Moderate         | <b>High</b>      | Moderate     | Moderate     |     |
|                                          | No consensus     | No consensus     | <b>Consensus</b> | No consensus | No consensus |     |
| <b>Round 2</b>                           |                  |                  |                  |              |              |     |
| Mean score                               | <b>7.4</b>       | <b>7.8</b>       | 6.9              | 6.6          | 6.3          | 7.0 |
| Median score                             | <b>7.0</b>       | <b>8.0</b>       | 7.0              | 7.0          | 6.0          |     |
| MADM                                     | <b>1.0</b>       | <b>1.0</b>       | 1.0              | 1.0          | 1.2          |     |
| Agreement                                | <b>High</b>      | <b>High</b>      | High             | High         | Moderate     |     |
|                                          | <b>Consensus</b> | <b>Consensus</b> | No consensus     | No consensus | No consensus |     |

| <b>Round 3</b>                                            |              |                  |              |              |              |     |
|-----------------------------------------------------------|--------------|------------------|--------------|--------------|--------------|-----|
| Mean score                                                | 7.5          | <b>8.1</b>       | 7.4          | 6.7          | 6.6          | 7.3 |
| Median score                                              | 7.0          | <b>8.0</b>       | 7.0          | 7.0          | 7.0          |     |
| MADM                                                      | 1.0          | <b>0.7</b>       | 1.2          | 0.8          | 1.1          |     |
| Agreement                                                 | High         | <b>High</b>      | Moderate     | High         | Moderate     |     |
|                                                           | No consensus | <b>Consensus</b> | No consensus | No consensus | No consensus |     |
| <b>56- Parent/caregiver anxiety symptoms</b>              |              |                  |              |              |              |     |
| <b>Round 1</b>                                            |              |                  |              |              |              |     |
| Mean score                                                | 6.7          | 6.6              | 5.4          | 5.3          | 5.9          | 6.0 |
| Median score                                              | 7.0          | 7.0              | 6.0          | 5.5          | 6.0          |     |
| MADM                                                      | 1.3          | 1.5              | 2.0          | 1.7          | 1.4          |     |
| Agreement                                                 | Moderate     | Low              | Low          | Low          | Moderate     |     |
|                                                           | No consensus | No consensus     | No consensus | No consensus | No consensus |     |
| <b>Round 2</b>                                            |              |                  |              |              |              |     |
| Mean score                                                | 6.8          | 7.1              | 6.1          | 5.8          | 5.5          | 6.3 |
| Median score                                              | 7.0          | 7.5              | 6.0          | 6.0          | 6.0          |     |
| MADM                                                      | 1.0          | 1.1              | 1.5          | 1.3          | 1.4          |     |
| Agreement                                                 | High         | Moderate         | Low          | Moderate     | Moderate     |     |
|                                                           | No consensus | No consensus     | No consensus | No consensus | No consensus |     |
| <b>Round 3</b>                                            |              |                  |              |              |              |     |
| Mean score                                                | 6.7          | 8.0              | 6.8          | 6.4          | 6.0          | 6.8 |
| Median score                                              | 7.0          | 8.0              | 7.0          | 7.0          | 6.0          |     |
| MADM                                                      | 1.2          | 0.9              | 1.4          | 0.9          | 1.1          |     |
| Agreement                                                 | Moderate     | High             | Moderate     | High         | High         |     |
|                                                           | No consensus | No consensus     | No consensus | No consensus | No consensus |     |
| <b>57- Parent/caregiver concerns about child's weight</b> |              |                  |              |              |              |     |
| <b>Round 1</b>                                            |              |                  |              |              |              |     |
| Mean score                                                | 6.9          | 7.1              | 6.1          | 6.5          | 6.2          | 6.6 |
| Median score                                              | 7.0          | 8.0              | 6.0          | 7.0          | 7.0          | 7.0 |

|                                                 |              |                  |              |              |              |     |
|-------------------------------------------------|--------------|------------------|--------------|--------------|--------------|-----|
| MADM                                            | 1.1          | 1.2              | 1.1          | 1.4          | 1.3          |     |
| Agreement                                       | Moderate     | Moderate         | Moderate     | Low          | Moderate     |     |
|                                                 | No consensus | No consensus     | No consensus | No consensus | No consensus |     |
| <b>Round 2</b>                                  |              |                  |              |              |              |     |
| Mean score                                      | 6.6          | 7.1              | 6.4          | 6.9          | 6.2          | 6.6 |
| Median score                                    | 7.0          | 7.0              | 6.0          | 7.0          | 7.0          |     |
| MADM                                            | 0.9          | 0.9              | 0.7          | 0.9          | 1.2          |     |
| Agreement                                       | High         | High             | High         | High         | Moderate     |     |
|                                                 | No consensus | No consensus     | No consensus | No consensus | No consensus |     |
| <b>Round 3</b>                                  |              |                  |              |              |              |     |
| Mean score                                      | 6.7          | <b>7.4</b>       | 6.4          | 7.0          | 6.4          | 6.8 |
| Median score                                    | 7.0          | <b>8.0</b>       | 6.0          | 7.0          | 7.0          |     |
| MADM                                            | 1.2          | <b>0.9</b>       | 0.8          | 0.9          | 0.9          |     |
| Agreement                                       | Moderate     | <b>High</b>      | High         | High         | High         |     |
|                                                 | No consensus | <b>Consensus</b> | No consensus | No consensus | No consensus |     |
| <b>58- Parent/caregiver depression symptoms</b> |              |                  |              |              |              |     |
| <b>Round 1</b>                                  |              |                  |              |              |              |     |
| Mean score                                      | 6.7          | 6.9              | 5.3          | 5.4          | 6.1          | 6.1 |
| Median score                                    | 7.0          | 8.0              | 5.0          | 5.0          | 6.0          |     |
| MADM                                            | 1.2          | 1.6              | 1.8          | 1.7          | 1.4          |     |
| Agreement                                       | Moderate     | Low              | Low          | Low          | Moderate     |     |
|                                                 | No consensus | No consensus     | No consensus | No consensus | No consensus |     |
| <b>Round 2</b>                                  |              |                  |              |              |              |     |
| Mean score                                      | 6.8          | 7.1              | 5.6          | 5.5          | 5.9          | 6.2 |
| Median score                                    | 7.0          | 7.5              | 5.0          | 5.0          | 6.0          |     |
| MADM                                            | 1.1          | 1.4              | 1.2          | 1.3          | 1.3          |     |
| Agreement                                       | High         | Moderate         | Moderate     | Moderate     | Moderate     |     |
|                                                 | No consensus | No consensus     | No consensus | No consensus | No consensus |     |
| <b>Round 3</b>                                  |              |                  |              |              |              |     |

|                                            |              |                  |              |              |              |     |
|--------------------------------------------|--------------|------------------|--------------|--------------|--------------|-----|
| Mean score                                 | 6.9          | 7.8              | 7.0          | 6.1          | 6.4          | 6.9 |
| Median score                               | 7.0          | 8.0              | 8.0          | 6.0          | 7.0          |     |
| MADM                                       | 1.0          | 0.8              | 1.0          | 0.9          | 1.0          |     |
| Agreement                                  | High         | High             | High         | High         | High         |     |
|                                            | No consensus | No consensus     | No consensus | No consensus | No consensus |     |
| <b>59- Parent/caregiver self-efficacy</b>  |              |                  |              |              |              |     |
| <b>Round 1</b>                             |              |                  |              |              |              |     |
| Mean score                                 | 6.9          | 6.7              | 6.3          | 6.2          | 6.3          | 6.5 |
| Median score                               | 7.0          | 7.0              | 6.0          | 6.5          | 6.0          |     |
| MADM                                       | 1.0          | 1.3              | 1.3          | 1.9          | 1.1          |     |
| Agreement                                  | High         | Moderate         | Moderate     | Low          | Moderate     |     |
|                                            | No consensus | No consensus     | No consensus | No consensus | No consensus |     |
| <b>Round 2</b>                             |              |                  |              |              |              |     |
| Mean score                                 | 6.7          | 7.1              | 5.9          | 6.5          | 6.5          | 6.5 |
| Median score                               | 7.0          | 7.0              | 6.0          | 7.0          | 6.0          |     |
| MADM                                       | 0.9          | 1.0              | 1.0          | 1.3          | 1.1          |     |
| Agreement                                  | High         | High             | High         | Moderate     | Moderate     |     |
|                                            | No consensus | No consensus     | No consensus | No consensus | No consensus |     |
| <b>Round 3</b>                             |              |                  |              |              |              |     |
| Mean score                                 | 6.7          | <b>7.6</b>       | 6.8          | 6.9          | 6.8          | 6.9 |
| Median score                               | 7.0          | <b>8.0</b>       | 8.0          | 7.0          | 7.0          |     |
| MADM                                       | 0.9          | <b>0.7</b>       | 1.2          | 1.1          | 0.9          |     |
| Agreement                                  | High         | <b>High</b>      | Moderate     | Moderate     | High         |     |
|                                            | No consensus | <b>Consensus</b> | No consensus | No consensus | No consensus |     |
| <b>60- Parent/caregiver social support</b> |              |                  |              |              |              |     |
| <b>Round 1</b>                             |              |                  |              |              |              |     |
| Mean score                                 | 6.9          | 6.9              | 6.3          | 6.2          | 6.3          | 6.5 |
| Median score                               | 7.0          | 7.0              | 7.0          | 6.5          | 6.0          |     |
| MADM                                       | 1.3          | 1.0              | 1.6          | 2.0          | 1.3          |     |



|                                    |              |              |                  |              |              |     |
|------------------------------------|--------------|--------------|------------------|--------------|--------------|-----|
| Agreement                          | Moderate     | High         | Low              | Low          | Moderate     |     |
|                                    | No consensus | No consensus | No consensus     | No consensus | No consensus |     |
| <b>Round 2</b>                     |              |              |                  |              |              |     |
| Mean score                         | 6.6          | 6.9          | 6.4              | 6.8          | 6.5          | 6.6 |
| Median score                       | 7.0          | 7.0          | 6.5              | 7.0          | 6.5          |     |
| MADM                               | 1.1          | 0.9          | 1.6              | 1.5          | 1.3          |     |
| Agreement                          | Moderate     | High         | Low              | Low          | Moderate     |     |
|                                    | No consensus | No consensus | No consensus     | No consensus | No consensus |     |
| <b>Round 3</b>                     |              |              |                  |              |              |     |
| Mean score                         | 6.7          | 7.1          | <b>7.6</b>       | 7.5          | 6.7          | 7.1 |
| Median score                       | 7.0          | 7.0          | <b>8.0</b>       | 8.0          | 7.0          |     |
| MADM                               | 1.1          | 0.7          | <b>0.8</b>       | 1.0          | 1.1          |     |
| Agreement                          | Moderate     | High         | <b>High</b>      | High         | High         |     |
|                                    | No consensus | No consensus | <b>Consensus</b> | No consensus | No consensus |     |
| <b>61- Parent/caregiver stress</b> |              |              |                  |              |              |     |
| <b>Round 1</b>                     |              |              |                  |              |              |     |
| Mean score                         | 6.8          | 6.9          | 5.8              | 5.8          | 6.2          | 6.3 |
| Median score                       | 7.0          | 7.0          | 6.0              | 6.0          | 6.0          |     |
| MADM                               | 1.3          | 1.2          | 1.8              | 1.9          | 1.3          |     |
| Agreement                          | Moderate     | Moderate     | Low              | Low          | Moderate     |     |
|                                    | No consensus | No consensus | No consensus     | No consensus | No consensus |     |
| <b>Round 2</b>                     |              |              |                  |              |              |     |
| Mean score                         | 6.5          | 7.1          | 5.8              | 6.2          | 6.3          | 6.4 |
| Median score                       | 7.0          | 7.0          | 5.0              | 6.0          | 6.0          |     |
| MADM                               | 1.1          | 0.8          | 1.4              | 1.3          | 1.2          |     |
| Agreement                          | Moderate     | High         | Moderate         | Moderate     | Moderate     |     |
|                                    | No consensus | No consensus | No consensus     | No consensus | No consensus |     |
| <b>Round 3</b>                     |              |              |                  |              |              |     |
| Mean score                         | 6.8          | 7.4          | 7.3              | 6.8          | 6.6          | 7.0 |

|                                                     |              |              |              |              |              |     |
|-----------------------------------------------------|--------------|--------------|--------------|--------------|--------------|-----|
| Median score                                        | 7.0          | 8.0          | 7.5          | 7.0          | 7.0          |     |
| MADM                                                | 0.9          | 1.0          | 1.3          | 1.0          | 0.9          |     |
| Agreement                                           | High         | High         | Moderate     | High         | High         |     |
|                                                     | No consensus | No consensus | No consensus | No consensus | No consensus |     |
| <b>62- Parent/caregiver attitudes</b>               |              |              |              |              |              |     |
| <b>Round 1</b>                                      |              |              |              |              |              |     |
| Mean score                                          | 7.5          | 7.0          | 6.2          | 6.2          | 6.2          | 6.6 |
| Median score                                        | 8.0          | 8.0          | 6.0          | 7.0          | 6.0          |     |
| MADM                                                | 1.1          | 1.3          | 1.6          | 1.5          | 1.2          |     |
| Agreement                                           | Moderate     | Moderate     | Low          | Low          | Moderate     |     |
|                                                     | Consensus    | No consensus | No consensus | No consensus | No consensus |     |
| <b>Round 2</b>                                      |              |              |              |              |              |     |
| Mean score                                          | 7.5          | 7.4          | 6.6          | 6.4          | 6.1          | 6.8 |
| Median score                                        | 8.0          | 7.5          | 7.0          | 7.0          | 6.0          |     |
| MADM                                                | 1.0          | 1.0          | 1.1          | 1.1          | 1.1          |     |
| Agreement                                           | High         | High         | Moderate     | Moderate     | Moderate     |     |
|                                                     | Consensus    | Consensus    | No consensus | No consensus | No consensus |     |
| <b>Round 3</b>                                      |              |              |              |              |              |     |
| Mean score                                          | 7.6          | 8.0          | 7.8          | 6.9          | 6.4          | 7.3 |
| Median score                                        | 8.0          | 8.0          | 9.0          | 7.0          | 6.0          |     |
| MADM                                                | 1.1          | 0.7          | 1.2          | 1.0          | 1.1          |     |
| Agreement                                           | High         | High         | Moderate     | High         | Moderate     |     |
|                                                     | Consensus    | Consensus    | No consensus | No consensus | No consensus |     |
| <b>63- Parent/caregiver awareness of behaviours</b> |              |              |              |              |              |     |
| <b>Round 1</b>                                      |              |              |              |              |              |     |
| Mean score                                          | 7.3          | 6.8          | 6.6          | 6.4          | 6.2          | 6.7 |
| Median score                                        | 8.0          | 7.0          | 7.0          | 6.0          | 6.0          |     |
| MADM                                                | 1.3          | 1.3          | 1.3          | 1.7          | 1.3          |     |
| Agreement                                           | Moderate     | Moderate     | Moderate     | Low          | Moderate     |     |

|                                     |                  |                  |              |              |              |     |
|-------------------------------------|------------------|------------------|--------------|--------------|--------------|-----|
|                                     | No consensus     | No consensus     | No consensus | No consensus | No consensus |     |
| <b>Round 2</b>                      |                  |                  |              |              |              |     |
| Mean score                          | 7.1              | <b>7.1</b>       | 6.6          | 6.4          | 6.3          | 6.7 |
| Median score                        | 7.0              | <b>7.0</b>       | 7.0          | 7.0          | 6.0          |     |
| MADM                                | 1.1              | <b>0.9</b>       | 1.2          | 1.4          | 1.2          |     |
| Agreement                           | Moderate         | <b>High</b>      | Moderate     | Moderate     | Moderate     |     |
|                                     | No consensus     | <b>Consensus</b> | No consensus | No consensus | No consensus |     |
| <b>Round 3</b>                      |                  |                  |              |              |              |     |
| Mean score                          | <b>7.4</b>       | <b>7.7</b>       | 7.6          | 6.6          | 6.4          | 7.1 |
| Median score                        | <b>7.0</b>       | <b>7.5</b>       | 8.0          | 7.0          | 6.0          |     |
| MADM                                | <b>1.1</b>       | <b>0.7</b>       | 1.2          | 1.1          | 1.1          |     |
| Agreement                           | <b>High</b>      | <b>High</b>      | Moderate     | Moderate     | Moderate     |     |
|                                     | <b>Consensus</b> | <b>Consensus</b> | No consensus | No consensus | No consensus |     |
| <b>64- Parent/caregiver beliefs</b> |                  |                  |              |              |              |     |
| <b>Round 1</b>                      |                  |                  |              |              |              |     |
| Mean score                          | 7.2              | 6.9              | 6.6          | 6.2          | 6.2          | 6.6 |
| Median score                        | 7.0              | 7.5              | 6.0          | 7.0          | 6.5          |     |
| MADM                                | 1.2              | 1.2              | 1.2          | 1.8          | 1.4          |     |
| Agreement                           | Moderate         | Moderate         | Moderate     | Low          | Moderate     |     |
|                                     | No consensus     | No consensus     | No consensus | No consensus | No consensus |     |
| <b>Round 2</b>                      |                  |                  |              |              |              |     |
| Mean score                          | <b>7.2</b>       | 7.2              | 7.0          | 6.1          | 6.1          | 6.7 |
| Median score                        | <b>7.0</b>       | 8.0              | 7.0          | 6.5          | 6.0          |     |
| MADM                                | <b>1.0</b>       | 1.0              | 0.6          | 1.5          | 1.2          |     |
| Agreement                           | <b>High</b>      | High             | High         | Low          | Moderate     |     |
|                                     | <b>Consensus</b> | No consensus     | No consensus | No consensus | No consensus |     |
| <b>Round 3</b>                      |                  |                  |              |              |              |     |
| Mean score                          | <b>7.5</b>       | <b>7.7</b>       | <b>7.8</b>   | 6.8          | 6.3          | 7.2 |
| Median score                        | <b>7.0</b>       | <b>8.0</b>       | <b>8.0</b>   | 7.0          | 6.0          |     |

|                                             |              |              |              |              |              |     |
|---------------------------------------------|--------------|--------------|--------------|--------------|--------------|-----|
| MADM                                        | 0.9          | 0.7          | 1.0          | 1.1          | 1.1          |     |
| Agreement                                   | High         | High         | High         | Moderate     | Moderate     |     |
|                                             | Consensus    | Consensus    | Consensus    | No consensus | No consensus |     |
| <b>65- Parent/caregiver health literacy</b> |              |              |              |              |              |     |
| <b>Round 1</b>                              |              |              |              |              |              |     |
| Mean score                                  | 7.5          | 7.0          | 7.2          | 6.7          | 6.6          | 7.0 |
| Median score                                | 8.0          | 7.0          | 8.0          | 7.0          | 7.0          |     |
| MADM                                        | 1.2          | 1.3          | 1.1          | 1.4          | 1.3          |     |
| Agreement                                   | Moderate     | Moderate     | Moderate     | Low          | Moderate     |     |
|                                             | No consensus | No consensus | Consensus    | No consensus | No consensus |     |
| <b>Round 2</b>                              |              |              |              |              |              |     |
| Mean score                                  | 7.5          | 7.5          | 7.1          | 7.2          | 6.7          | 7.2 |
| Median score                                | 8.0          | 7.5          | 7.0          | 7.5          | 7.0          |     |
| MADM                                        | 1.0          | 1.1          | 0.7          | 1.4          | 1.1          |     |
| Agreement                                   | High         | Moderate     | High         | Moderate     | Moderate     |     |
|                                             | Consensus    | Consensus    | No consensus | No consensus | No consensus |     |
| <b>Round 3</b>                              |              |              |              |              |              |     |
| Mean score                                  | 7.7          | 7.8          | 7.2          | 7.3          | 6.9          | 7.4 |
| Median score                                | 8.0          | 8.0          | 7.0          | 8.0          | 7.0          |     |
| MADM                                        | 0.9          | 0.5          | 0.6          | 1.1          | 1.0          |     |
| Agreement                                   | High         | High         | High         | Moderate     | High         |     |
|                                             | Consensus    | Consensus    | Consensus    | No consensus | No consensus |     |
| <b>66- Parent/caregiver knowledge</b>       |              |              |              |              |              |     |
| <b>Round 1</b>                              |              |              |              |              |              |     |
| Mean score                                  | 7.6          | 7.1          | 7.1          | 6.8          | 6.3          | 7.0 |
| Median score                                | 8.0          | 7.0          | 7.0          | 7.0          | 6.0          |     |
| MADM                                        | 1.1          | 1.2          | 1.3          | 1.3          | 1.2          |     |
| Agreement                                   | Moderate     | Moderate     | Moderate     | Moderate     | Moderate     |     |
|                                             | No consensus | No consensus | No consensus | No consensus | No consensus |     |

| <b>Round 2</b>                                  |           |              |              |              |              |     |
|-------------------------------------------------|-----------|--------------|--------------|--------------|--------------|-----|
| Mean score                                      | 7.6       | 7.6          | 6.8          | 7.0          | 6.2          | 7.0 |
| Median score                                    | 7.0       | 7.0          | 6.5          | 7.0          | 6.0          |     |
| MADM                                            | 1.0       | 1.0          | 1.0          | 1.1          | 1.1          |     |
| Agreement                                       | High      | High         | High         | Moderate     | Moderate     |     |
|                                                 | Consensus | Consensus    | No consensus | No consensus | No consensus |     |
| <b>Round 3</b>                                  |           |              |              |              |              |     |
| Mean score                                      | 7.6       | 7.7          | 7.2          | 7.1          | 6.1          | 7.1 |
| Median score                                    | 8.0       | 7.0          | 7.0          | 7.0          | 6.0          |     |
| MADM                                            | 0.9       | 0.7          | 1.0          | 1.2          | 1.0          |     |
| Agreement                                       | High      | High         | High         | Moderate     | High         |     |
|                                                 | Consensus | Consensus    | No consensus | No consensus | No consensus |     |
| <b>67- Parent/caregiver readiness to change</b> |           |              |              |              |              |     |
| <b>Round 1</b>                                  |           |              |              |              |              |     |
| Mean score                                      | 8.0       | 7.2          | 7.2          | 6.4          | 6.5          | 7.0 |
| Median score                                    | 9.0       | 7.0          | 7.0          | 6.0          | 6.0          |     |
| MADM                                            | 1.0       | 1.2          | 1.0          | 1.7          | 1.3          |     |
| Agreement                                       | Moderate  | Moderate     | High         | Low          | Moderate     |     |
|                                                 | Consensus | No consensus | No consensus | No consensus | No consensus |     |
| <b>Round 2</b>                                  |           |              |              |              |              |     |
| Mean score                                      | 8.1       | 7.7          | 7.3          | 6.9          | 6.5          | 7.3 |
| Median score                                    | 9.0       | 8.0          | 7.0          | 7.5          | 6.0          |     |
| MADM                                            | 0.9       | 0.9          | 1.3          | 1.6          | 1.2          |     |
| Agreement                                       | High      | High         | Moderate     | Low          | Moderate     |     |
|                                                 | Consensus | Consensus    | No consensus | No consensus | No consensus |     |
| <b>Round 3</b>                                  |           |              |              |              |              |     |
| Mean score                                      | 7.9       | 8.2          | 7.2          | 6.9          | 6.7          | 7.4 |
| Median score                                    | 9.0       | 8.0          | 7.0          | 7.0          | 6.5          |     |
| MADM                                            | 1.1       | 0.5          | 1.0          | 1.4          | 1.3          |     |

|                                            |                  |                  |              |              |              |     |
|--------------------------------------------|------------------|------------------|--------------|--------------|--------------|-----|
| Agreement                                  | <b>Moderate</b>  | <b>High</b>      | High         | Low          | Moderate     |     |
|                                            | <b>Consensus</b> | <b>Consensus</b> | No consensus | No consensus | No consensus |     |
| <b>68- Parenting style</b>                 |                  |                  |              |              |              |     |
| <b>Round 1</b>                             |                  |                  |              |              |              |     |
| Mean score                                 | 6.6              | 6.6              | 6.6          | 6.1          | 6.1          | 6.4 |
| Median score                               | 7.0              | 7.0              | 7.0          | 7.0          | 6.0          |     |
| MADM                                       | 1.2              | 1.4              | 1.6          | 1.8          | 1.4          |     |
| Agreement                                  | Moderate         | Low              | Low          | Low          | Moderate     |     |
|                                            | No consensus     | No consensus     | No consensus | No consensus | No consensus |     |
| <b>Round 2</b>                             |                  |                  |              |              |              |     |
| Mean score                                 | 6.9              | 7.2              | 6.1          | 6.1          | 6.2          | 6.5 |
| Median score                               | 7.0              | 8.0              | 6.0          | 7.0          | 6.0          |     |
| MADM                                       | 0.9              | 1.2              | 1.1          | 1.3          | 1.2          |     |
| Agreement                                  | High             | Moderate         | Moderate     | Moderate     | Moderate     |     |
|                                            | No consensus     | No consensus     | No consensus | No consensus | No consensus |     |
| <b>Round 3</b>                             |                  |                  |              |              |              |     |
| Mean score                                 | <b>7.1</b>       | <b>7.8</b>       | 6.4          | 6.8          | 6.3          | 6.9 |
| Median score                               | <b>7.0</b>       | <b>8.0</b>       | 6.0          | 7.0          | 6.0          |     |
| MADM                                       | <b>0.9</b>       | <b>0.5</b>       | 1.2          | 0.9          | 1.3          |     |
| Agreement                                  | <b>High</b>      | <b>High</b>      | Moderate     | High         | Moderate     |     |
|                                            | <b>Consensus</b> | <b>Consensus</b> | No consensus | No consensus | No consensus |     |
| <b>69- Parent/caregiver responsiveness</b> |                  |                  |              |              |              |     |
| <b>Round 1</b>                             |                  |                  |              |              |              |     |
| Mean score                                 | 7.2              | 6.7              | 6.5          | 6.2          | 6.4          | 6.6 |
| Median score                               | 7.0              | 7.0              | 7.0          | 6.0          | 6.0          |     |
| MADM                                       | 1.0              | 1.2              | 1.4          | 1.9          | 1.3          |     |
| Agreement                                  | High             | Moderate         | Low          | Low          | Moderate     |     |
|                                            | No consensus     | No consensus     | No consensus | No consensus | No consensus |     |
| <b>Round 2</b>                             |                  |                  |              |              |              |     |

|                               |                  |                  |              |              |              |     |
|-------------------------------|------------------|------------------|--------------|--------------|--------------|-----|
| Mean score                    | 7.3              | 6.9              | 6.1          | 6.6          | 6.4          | 6.7 |
| Median score                  | 7.0              | 7.0              | 6.0          | 7.0          | 6.0          |     |
| MADM                          | 0.8              | 0.9              | 0.9          | 1.1          | 1.2          |     |
| Agreement                     | High             | High             | High         | High         | Moderate     |     |
|                               | No consensus     | No consensus     | No consensus | No consensus | No consensus |     |
| <b>Round 3</b>                |                  |                  |              |              |              |     |
| Mean score                    | <b>7.7</b>       | <b>7.3</b>       | 7.0          | 6.6          | 6.6          | 7.0 |
| Median score                  | <b>8.0</b>       | <b>7.5</b>       | 8.0          | 7.0          | 6.0          |     |
| MADM                          | <b>0.9</b>       | <b>0.7</b>       | 1.0          | 1.1          | 1.1          |     |
| Agreement                     | <b>High</b>      | <b>High</b>      | High         | Moderate     | Moderate     |     |
|                               | <b>Consensus</b> | <b>Consensus</b> | No consensus | No consensus | No consensus |     |
| <b>70- Family functioning</b> |                  |                  |              |              |              |     |
| <b>Round 1</b>                |                  |                  |              |              |              |     |
| Mean score                    | 7.0              | 6.4              | 6.7          | 5.9          | 6.4          | 6.5 |
| Median score                  | 7.0              | 6.5              | 6.5          | 6.0          | 6.0          |     |
| MADM                          | 1.2              | 1.3              | 1.2          | 1.7          | 1.3          |     |
| Agreement                     | Moderate         | Moderate         | Moderate     | Low          | Moderate     |     |
|                               | No consensus     | No consensus     | No consensus | No consensus | No consensus |     |
| <b>Round 2</b>                |                  |                  |              |              |              |     |
| Mean score                    | 6.8              | 7.0              | 6.4          | 6.2          | 6.4          | 6.6 |
| Median score                  | 7.0              | 7.5              | 6.0          | 7.0          | 6.0          |     |
| MADM                          | 0.8              | 1.0              | 0.9          | 1.2          | 1.1          |     |
| Agreement                     | High             | High             | High         | Moderate     | Moderate     |     |
|                               | No consensus     | No consensus     | No consensus | No consensus | No consensus |     |
| <b>Round 3</b>                |                  |                  |              |              |              |     |
| Mean score                    | 7.1              | <b>7.3</b>       | 7.2          | 6.6          | 6.5          | 6.9 |
| Median score                  | 7.0              | <b>8.0</b>       | 8.0          | 7.0          | 6.0          |     |
| MADM                          | 0.9              | <b>0.7</b>       | 0.8          | 0.9          | 1.0          |     |
| Agreement                     | High             | <b>High</b>      | High         | High         | High         |     |

|                                                                                  |                  |                  |              |              |              |     |
|----------------------------------------------------------------------------------|------------------|------------------|--------------|--------------|--------------|-----|
|                                                                                  | No consensus     | <b>Consensus</b> | No consensus | No consensus | No consensus |     |
| <b>71- Parent/caregiver perception of child weight</b>                           |                  |                  |              |              |              |     |
| <b>Round 1</b>                                                                   |                  |                  |              |              |              |     |
| Mean score                                                                       | 7.3              | 7.1              | 6.8          | 6.8          | 6.4          | 6.9 |
| Median score                                                                     | 7.0              | 7.0              | 7.0          | 7.0          | 7.0          |     |
| MADM                                                                             | 1.0              | 1.1              | 1.1          | 1.5          | 1.3          |     |
| Agreement                                                                        | High             | Moderate         | Moderate     | Low          | Moderate     |     |
|                                                                                  | No consensus     | No consensus     | No consensus | No consensus | No consensus |     |
| <b>Round 2</b>                                                                   |                  |                  |              |              |              |     |
| Mean score                                                                       | <b>7.2</b>       | 6.9              | 6.8          | 6.8          | 6.4          | 6.8 |
| Median score                                                                     | <b>7.0</b>       | 7.0              | 7.0          | 7.0          | 7.0          |     |
| MADM                                                                             | <b>0.9</b>       | 0.7              | 1.0          | 0.9          | 1.0          |     |
| Agreement                                                                        | <b>High</b>      | High             | High         | High         | High         |     |
|                                                                                  | <b>Consensus</b> | No consensus     | No consensus | No consensus | No consensus |     |
| <b>Round 3</b>                                                                   |                  |                  |              |              |              |     |
| Mean score                                                                       | 7.1              | <b>7.2</b>       | 7.0          | 6.8          | 6.6          | 6.9 |
| Median score                                                                     | 7.0              | <b>7.0</b>       | 8.0          | 7.0          | 7.0          |     |
| MADM                                                                             | 1.2              | <b>0.8</b>       | 1.4          | 0.9          | 1.0          |     |
| Agreement                                                                        | Moderate         | <b>High</b>      | Moderate     | High         | High         |     |
|                                                                                  | No consensus     | <b>Consensus</b> | No consensus | No consensus | No consensus |     |
| <b>72- Perception of parent/caregiver influence on child's health behaviours</b> |                  |                  |              |              |              |     |
| <b>Round 1</b>                                                                   |                  |                  |              |              |              |     |
| Mean score                                                                       | 7.4              | 7.0              | 7.1          | 6.7          | 6.4          | 6.9 |
| Median score                                                                     | 7.0              | 7.0              | 7.5          | 7.0          | 7.0          |     |
| MADM                                                                             | 1.1              | 1.1              | 1.2          | 1.7          | 1.3          |     |
| Agreement                                                                        | High             | High             | Moderate     | Low          | Moderate     |     |
|                                                                                  | No consensus     | No consensus     | No consensus | No consensus | No consensus |     |
| <b>Round 2</b>                                                                   |                  |                  |              |              |              |     |
| Mean score                                                                       | <b>7.5</b>       | <b>7.5</b>       | 7.0          | 6.8          | 6.4          | 7.0 |



|                                                                               |              |              |              |              |              |     |
|-------------------------------------------------------------------------------|--------------|--------------|--------------|--------------|--------------|-----|
| Median score                                                                  | 7.5          | 7.0          | 7.0          | 7.0          | 7.0          |     |
| MADM                                                                          | 1.0          | 0.7          | 1.1          | 1.5          | 1.3          |     |
| Agreement                                                                     | High         | High         | Moderate     | Low          | Moderate     |     |
|                                                                               | Consensus    | Consensus    | No consensus | No consensus | No consensus |     |
| <b>Round 3</b>                                                                |              |              |              |              |              |     |
| Mean score                                                                    | 7.5          | 8.0          | 7.0          | 7.1          | 6.5          | 7.2 |
| Median score                                                                  | 8.0          | 8.0          | 7.0          | 7.0          | 7.0          |     |
| MADM                                                                          | 0.7          | 0.7          | 1.2          | 1.2          | 1.1          |     |
| Agreement                                                                     | High         | High         | Moderate     | Moderate     | Moderate     |     |
|                                                                               | Consensus    | Consensus    | No consensus | No consensus | No consensus |     |
| <b>73- Parent/caregiver perceptions of adequacy of resources and barriers</b> |              |              |              |              |              |     |
| <b>Round 1</b>                                                                |              |              |              |              |              |     |
| Mean score                                                                    | 7.4          | 7.1          | 6.6          | 6.9          | 6.5          | 6.9 |
| Median score                                                                  | 8.0          | 7.5          | 7.0          | 7.0          | 7.0          |     |
| MADM                                                                          | 1.1          | 1.3          | 1.4          | 1.4          | 1.2          |     |
| Agreement                                                                     | Moderate     | Moderate     | Low          | Moderate     | Moderate     |     |
|                                                                               | No consensus | No consensus | No consensus | No consensus | No consensus |     |
| <b>Round 2</b>                                                                |              |              |              |              |              |     |
| Mean score                                                                    | 7.4          | 7.4          | 6.9          | 7.1          | 6.6          | 7.1 |
| Median score                                                                  | 8.0          | 8.0          | 7.0          | 7.0          | 7.0          |     |
| MADM                                                                          | 0.7          | 1.0          | 1.1          | 0.9          | 1.1          |     |
| Agreement                                                                     | High         | High         | Moderate     | High         | Moderate     |     |
|                                                                               | Consensus    | Consensus    | No consensus | Consensus    | No consensus |     |
| <b>Round 3</b>                                                                |              |              |              |              |              |     |
| Mean score                                                                    | 7.4          | 7.5          | 6.8          | 7.6          | 6.7          | 7.2 |
| Median score                                                                  | 8.0          | 7.0          | 7.0          | 7.0          | 7.0          |     |
| MADM                                                                          | 0.6          | 0.5          | 1.0          | 0.6          | 1.0          |     |
| Agreement                                                                     | High         | High         | High         | High         | High         |     |
|                                                                               | Consensus    | Consensus    | No consensus | Consensus    | No consensus |     |

| <b>74- Parent/caregiver feeding control</b>   |                  |                  |              |              |              |     |
|-----------------------------------------------|------------------|------------------|--------------|--------------|--------------|-----|
| <b>Round 1</b>                                |                  |                  |              |              |              |     |
| Mean score                                    | <b>7.8</b>       | 6.7              | 6.3          | 6.7          | 6.6          | 6.8 |
| Median score                                  | <b>8.0</b>       | 7.0              | 7.0          | 7.0          | 7.0          |     |
| MADM                                          | <b>1.0</b>       | 1.6              | 1.4          | 1.4          | 1.3          |     |
| Agreement                                     | <b>High</b>      | Low              | Moderate     | Low          | Moderate     |     |
|                                               | <b>Consensus</b> | No consensus     | No consensus | No consensus | No consensus |     |
| <b>Round 2</b>                                |                  |                  |              |              |              |     |
| Mean score                                    | <b>7.8</b>       | <b>7.8</b>       | 6.2          | 6.8          | 6.7          | 7.1 |
| Median score                                  | <b>8.0</b>       | <b>8.0</b>       | 7.0          | 7.0          | 7.0          |     |
| MADM                                          | <b>0.7</b>       | <b>0.8</b>       | 1.3          | 1.2          | 1.1          |     |
| Agreement                                     | <b>High</b>      | <b>High</b>      | Moderate     | Moderate     | Moderate     |     |
|                                               | <b>Consensus</b> | <b>Consensus</b> | No consensus | No consensus | No consensus |     |
| <b>Round 3</b>                                |                  |                  |              |              |              |     |
| Mean score                                    | <b>8.0</b>       | <b>8.0</b>       | 4.8          | 7.1          | 6.8          | 6.9 |
| Median score                                  | <b>8.0</b>       | <b>8.0</b>       | 5.5          | 7.0          | 7.0          |     |
| MADM                                          | <b>0.9</b>       | <b>0.9</b>       | 2.2          | 1.2          | 1.1          |     |
| Agreement                                     | <b>High</b>      | <b>High</b>      | Low          | Moderate     | Moderate     |     |
|                                               | <b>Consensus</b> | <b>Consensus</b> | No consensus | No consensus | No consensus |     |
| <b>75- Parent/caregiver emotional feeding</b> |                  |                  |              |              |              |     |
| <b>Round 1</b>                                |                  |                  |              |              |              |     |
| Mean score                                    | <b>7.8</b>       | 6.8              | 6.6          | 6.3          | 6.4          | 6.8 |
| Median score                                  | <b>8.0</b>       | 7.0              | 7.0          | 6.0          | 6.0          |     |
| MADM                                          | <b>0.9</b>       | 1.6              | 1.3          | 1.5          | 1.4          |     |
| Agreement                                     | <b>High</b>      | Low              | Moderate     | Low          | Moderate     |     |
|                                               | <b>Consensus</b> | No consensus     | No consensus | No consensus | No consensus |     |
| <b>Round 2</b>                                |                  |                  |              |              |              |     |
| Mean score                                    | <b>7.6</b>       | 7.7              | 6.9          | 6.3          | 6.6          | 7.0 |
| Median score                                  | <b>8.0</b>       | 8.0              | 7.0          | 6.0          | 7.0          |     |

|                                                   |              |              |              |              |              |     |
|---------------------------------------------------|--------------|--------------|--------------|--------------|--------------|-----|
| MADM                                              | 0.9          | 0.8          | 1.1          | 1.3          | 1.3          |     |
| Agreement                                         | High         | High         | Moderate     | Moderate     | Moderate     |     |
|                                                   | Consensus    | No consensus | No consensus | No consensus | No consensus |     |
| <b>Round 3</b>                                    |              |              |              |              |              |     |
| Mean score                                        | 7.7          | 8.0          | 5.7          | 6.8          | 6.7          | 7.0 |
| Median score                                      | 8.0          | 8.0          | 6.0          | 7.0          | 7.0          |     |
| MADM                                              | 0.8          | 0.6          | 1.3          | 1.3          | 1.3          |     |
| Agreement                                         | High         | High         | Moderate     | Moderate     | Moderate     |     |
|                                                   | Consensus    | Consensus    | No consensus | No consensus | No consensus |     |
| <b>76- Parent/caregiver feeding encouragement</b> |              |              |              |              |              |     |
| <b>Round 1</b>                                    |              |              |              |              |              |     |
| Mean score                                        | 7.3          | 7.4          | 6.5          | 6.4          | 6.3          | 6.8 |
| Median score                                      | 7.0          | 7.5          | 7.0          | 6.0          | 6.0          |     |
| MADM                                              | 1.0          | 1.3          | 1.1          | 1.5          | 1.2          |     |
| Agreement                                         | High         | Moderate     | Moderate     | Low          | Moderate     |     |
|                                                   | No consensus | Consensus    | No consensus | No consensus | No consensus |     |
| <b>Round 2</b>                                    |              |              |              |              |              |     |
| Mean score                                        | 7.1          | 7.9          | 6.5          | 6.4          | 6.4          | 6.9 |
| Median score                                      | 7.0          | 8.0          | 7.0          | 7.0          | 6.0          |     |
| MADM                                              | 0.9          | 0.7          | 1.0          | 1.1          | 1.0          |     |
| Agreement                                         | High         | High         | High         | Moderate     | High         |     |
|                                                   | No consensus | Consensus    | No consensus | No consensus | No consensus |     |
| <b>Round 3</b>                                    |              |              |              |              |              |     |
| Mean score                                        | 7.1          | 7.9          | 6.8          | 6.8          | 6.5          | 7.0 |
| Median score                                      | 7.0          | 8.0          | 6.5          | 7.0          | 7.0          |     |
| MADM                                              | 1.2          | 0.7          | 1.2          | 1.1          | 1.0          |     |
| Agreement                                         | Moderate     | High         | Moderate     | Moderate     | High         |     |
|                                                   | No consensus | Consensus    | No consensus | No consensus | No consensus |     |
| <b>77- Parent/caregiver feeding interaction</b>   |              |              |              |              |              |     |

|                                               |                  |                  |              |              |              |     |
|-----------------------------------------------|------------------|------------------|--------------|--------------|--------------|-----|
| <b>Round 1</b>                                |                  |                  |              |              |              |     |
| Mean score                                    | 7.7              | 7.3              | 6.4          | 6.9          | 6.7          | 7.0 |
| Median score                                  | 8.0              | 7.5              | 7.0          | 7.0          | 7.0          |     |
| MADM                                          | 0.9              | 1.1              | 1.5          | 1.3          | 1.3          |     |
| Agreement                                     | High             | Moderate         | Low          | Moderate     | Moderate     |     |
|                                               | No consensus     | No consensus     | No consensus | No consensus | No consensus |     |
| <b>Round 2</b>                                |                  |                  |              |              |              |     |
| Mean score                                    | 7.4              | <b>7.8</b>       | 6.8          | 6.9          | 6.7          | 7.1 |
| Median score                                  | 7.0              | <b>8.0</b>       | 6.5          | 7.0          | 7.0          |     |
| MADM                                          | 1.1              | <b>0.8</b>       | 1.3          | 1.0          | 1.2          |     |
| Agreement                                     | Moderate         | <b>High</b>      | Moderate     | High         | Moderate     |     |
|                                               | No consensus     | <b>Consensus</b> | No consensus | No consensus | No consensus |     |
| <b>Round 3</b>                                |                  |                  |              |              |              |     |
| Mean score                                    | <b>7.7</b>       | <b>7.9</b>       | 7.0          | 7.0          | 6.7          | 7.3 |
| Median score                                  | <b>8.0</b>       | <b>8.0</b>       | 7.0          | 7.0          | 7.0          |     |
| MADM                                          | <b>1.1</b>       | <b>0.7</b>       | 1.7          | 1.3          | 1.3          |     |
| Agreement                                     | <b>Moderate</b>  | <b>High</b>      | Low          | Moderate     | Moderate     |     |
|                                               | <b>Consensus</b> | <b>Consensus</b> | No consensus | No consensus | No consensus |     |
| <b>78- Parent/caregiver feeding structure</b> |                  |                  |              |              |              |     |
| <b>Round 1</b>                                |                  |                  |              |              |              |     |
| Mean score                                    | 7.5              | 7.0              | 6.7          | 6.7          | 6.4          | 6.9 |
| Median score                                  | 8.0              | 7.5              | 7.0          | 6.0          | 6.0          |     |
| MADM                                          | 1.1              | 1.3              | 1.4          | 1.4          | 1.3          |     |
| Agreement                                     | Moderate         | Moderate         | Moderate     | Moderate     | Moderate     |     |
|                                               | No consensus     | No consensus     | No consensus | No consensus | No consensus |     |
| <b>Round 2</b>                                |                  |                  |              |              |              |     |
| Mean score                                    | 7.4              | <b>7.8</b>       | 6.5          | 6.6          | 6.4          | 6.9 |
| Median score                                  | 8.0              | <b>8.0</b>       | 6.0          | 7.0          | 6.0          |     |
| MADM                                          | 1.1              | <b>0.6</b>       | 1.2          | 1.0          | 1.0          |     |

|                                                    |              |              |              |              |              |     |
|----------------------------------------------------|--------------|--------------|--------------|--------------|--------------|-----|
| Agreement                                          | High         | High         | Moderate     | High         | High         |     |
|                                                    | No consensus | Consensus    | No consensus | No consensus | No consensus |     |
| <b>Round 3</b>                                     |              |              |              |              |              |     |
| Mean score                                         | 7.3          | 7.9          | 6.2          | 6.8          | 6.5          | 6.9 |
| Median score                                       | 7.0          | 8.0          | 5.5          | 7.0          | 6.0          |     |
| MADM                                               | 1.3          | 0.7          | 1.2          | 1.3          | 1.1          |     |
| Agreement                                          | Moderate     | High         | Moderate     | Moderate     | Moderate     |     |
|                                                    | No consensus | Consensus    | No consensus | No consensus | No consensus |     |
| <b>79- Parent/caregiver feeding style</b>          |              |              |              |              |              |     |
| <b>Round 1</b>                                     |              |              |              |              |              |     |
| Mean score                                         | 7.3          | 6.6          | 6.3          | 6.4          | 6.5          | 6.6 |
| Median score                                       | 8.0          | 7.0          | 7.0          | 7.0          | 7.0          |     |
| MADM                                               | 1.2          | 1.4          | 1.4          | 1.2          | 1.2          |     |
| Agreement                                          | Moderate     | Low          | Low          | Moderate     | Moderate     |     |
|                                                    | No consensus | No consensus | No consensus | No consensus | No consensus |     |
| <b>Round 2</b>                                     |              |              |              |              |              |     |
| Mean score                                         | 7.1          | 7.7          | 6.3          | 6.7          | 6.5          | 6.9 |
| Median score                                       | 7.0          | 8.0          | 6.0          | 7.0          | 7.0          |     |
| MADM                                               | 1.0          | 0.8          | 1.0          | 0.9          | 1.1          |     |
| Agreement                                          | High         | High         | High         | High         | Moderate     |     |
|                                                    | No consensus | Consensus    | No consensus | No consensus | No consensus |     |
| <b>Round 3</b>                                     |              |              |              |              |              |     |
| Mean score                                         | 7.4          | 8.0          | 6.3          | 6.9          | 6.4          | 7.0 |
| Median score                                       | 7.0          | 8.0          | 6.5          | 7.0          | 7.0          |     |
| MADM                                               | 1.2          | 0.6          | 1.7          | 1.2          | 1.2          |     |
| Agreement                                          | Moderate     | High         | Low          | Moderate     | Moderate     |     |
|                                                    | No consensus | Consensus    | No consensus | No consensus | No consensus |     |
| <b>80- Parent/caregiver using food as a reward</b> |              |              |              |              |              |     |
| <b>Round 1</b>                                     |              |              |              |              |              |     |

|                                                     |                  |                  |              |              |              |     |
|-----------------------------------------------------|------------------|------------------|--------------|--------------|--------------|-----|
| Mean score                                          | <b>7.7</b>       | 6.6              | 6.8          | 6.8          | 6.6          | 6.9 |
| Median score                                        | <b>8.0</b>       | 7.0              | 7.0          | 7.0          | 7.0          |     |
| MADM                                                | <b>1.2</b>       | 1.7              | 1.5          | 1.6          | 1.2          |     |
| Agreement                                           | <b>Moderate</b>  | Low              | Low          | Low          | Moderate     |     |
|                                                     | <b>Consensus</b> | No consensus     | No consensus | No consensus | No consensus |     |
| <b>Round 2</b>                                      |                  |                  |              |              |              |     |
| Mean score                                          | <b>7.9</b>       | <b>7.9</b>       | 6.6          | 7.0          | 7.0          | 7.3 |
| Median score                                        | <b>8.0</b>       | <b>8.0</b>       | 7.0          | 7.0          | 7.0          |     |
| MADM                                                | <b>0.9</b>       | <b>0.8</b>       | 1.3          | 1.3          | 0.8          |     |
| Agreement                                           | <b>High</b>      | <b>High</b>      | Moderate     | Moderate     | High         |     |
|                                                     | <b>Consensus</b> | <b>Consensus</b> | No consensus | No consensus | No consensus |     |
| <b>Round 3</b>                                      |                  |                  |              |              |              |     |
| Mean score                                          | <b>8.1</b>       | <b>8.0</b>       | 6.7          | 7.2          | 7.0          | 7.4 |
| Median score                                        | <b>8.0</b>       | <b>8.0</b>       | 6.5          | 8.0          | 7.0          |     |
| MADM                                                | <b>0.7</b>       | <b>0.9</b>       | 1.0          | 1.4          | 0.9          |     |
| Agreement                                           | <b>High</b>      | <b>High</b>      | High         | Low          | High         |     |
|                                                     | <b>Consensus</b> | <b>Consensus</b> | No consensus | No consensus | No consensus |     |
| <b>81- Parent/caregiver frequency of bottle use</b> |                  |                  |              |              |              |     |
| <b>Round 1</b>                                      |                  |                  |              |              |              |     |
| Mean score                                          | 7.8              | 6.6              | 6.1          | 6.4          | 6.0          | 6.6 |
| Median score                                        | 8.0              | 7.0              | 6.0          | 7.0          | 6.0          |     |
| MADM                                                | 1.0              | 1.4              | 1.9          | 1.9          | 1.2          |     |
| Agreement                                           | Moderate         | Moderate         | Low          | Low          | Moderate     |     |
|                                                     | No consensus     | No consensus     | No consensus | No consensus | No consensus |     |
| <b>Round 2</b>                                      |                  |                  |              |              |              |     |
| Mean score                                          | <b>7.79</b>      | 7.38             | 5.64         | 6.73         | 6.02         | 6.7 |
| Median score                                        | <b>8.00</b>      | 8.00             | 6.00         | 7.00         | 6.00         |     |
| MADM                                                | <b>1.10</b>      | 0.88             | 0.91         | 1.47         | 1.02         |     |
| Agreement                                           | <b>Moderate</b>  | High             | High         | Low          | High         |     |

|                                                             |                  |                  |                  |              |              |     |
|-------------------------------------------------------------|------------------|------------------|------------------|--------------|--------------|-----|
|                                                             | <b>Consensus</b> | No consensus     | No consensus     | No consensus | No consensus |     |
| <b>Round 3</b>                                              |                  |                  |                  |              |              |     |
| Mean score                                                  | <b>7.9</b>       | 7.2              | 5.4              | 6.7          | 6.1          | 6.7 |
| Median score                                                | <b>8.0</b>       | 7.5              | 5.0              | 7.0          | 6.0          |     |
| MADM                                                        | <b>1.0</b>       | 1.2              | 1.6              | 1.7          | 1.1          |     |
| Agreement                                                   | <b>High</b>      | Moderate         | Low              | Low          | Moderate     |     |
|                                                             | <b>Consensus</b> | No consensus     | No consensus     | No consensus | No consensus |     |
| <b>82- Parent/caregiver promoting autonomy</b>              |                  |                  |                  |              |              |     |
| <b>Round 1</b>                                              |                  |                  |                  |              |              |     |
| Mean score                                                  | <b>7.5</b>       | 6.8              | 6.8              | 6.3          | 6.4          | 6.8 |
| Median score                                                | <b>8.0</b>       | 6.0              | 7.0              | 6.0          | 6.0          |     |
| MADM                                                        | <b>1.1</b>       | 1.3              | 1.3              | 1.5          | 1.2          |     |
| Agreement                                                   | <b>Moderate</b>  | Moderate         | Moderate         | Low          | Moderate     |     |
|                                                             | <b>Consensus</b> | No consensus     | No consensus     | No consensus | No consensus |     |
| <b>Round 2</b>                                              |                  |                  |                  |              |              |     |
| Mean score                                                  | <b>7.5</b>       | 7.8              | <b>7.1</b>       | 6.3          | 6.6          | 7.0 |
| Median score                                                | <b>7.5</b>       | 8.0              | <b>7.0</b>       | 6.5          | 7.0          |     |
| MADM                                                        | <b>1.0</b>       | 0.7              | <b>1.3</b>       | 1.3          | 1.0          |     |
| Agreement                                                   | <b>High</b>      | High             | <b>Moderate</b>  | Moderate     | High         |     |
|                                                             | <b>Consensus</b> | No consensus     | <b>Consensus</b> | No consensus | No consensus |     |
| <b>Round 3</b>                                              |                  |                  |                  |              |              |     |
| Mean score                                                  | 7.5              | <b>8.0</b>       | <b>7.3</b>       | 6.7          | 6.7          | 7.3 |
| Median score                                                | 8.0              | <b>8.0</b>       | <b>7.5</b>       | 7.0          | 7.0          |     |
| MADM                                                        | 1.0              | <b>0.6</b>       | <b>1.3</b>       | 1.2          | 1.0          |     |
| Agreement                                                   | High             | <b>High</b>      | <b>Moderate</b>  | Moderate     | High         |     |
|                                                             | No consensus     | <b>Consensus</b> | <b>Consensus</b> | No consensus | No consensus |     |
| <b>83- Parent/caregiver that is responsible for feeding</b> |                  |                  |                  |              |              |     |
| <b>Round 1</b>                                              |                  |                  |                  |              |              |     |
| Mean score                                                  | 7.1              | 6.7              | 6.1              | 6.9          | 6.2          | 6.6 |

|                             |              |              |              |              |              |     |
|-----------------------------|--------------|--------------|--------------|--------------|--------------|-----|
| Median score                | 7.0          | 7.0          | 6.5          | 7.0          | 6.0          |     |
| MADM                        | 1.5          | 1.5          | 1.9          | 1.5          | 1.4          |     |
| Agreement                   | Low          | Low          | Low          | Low          | Low          |     |
|                             | No consensus | No consensus | No consensus | No consensus | No consensus |     |
| <b>Round 2</b>              |              |              |              |              |              |     |
| Mean score                  | 7.5          | 7.7          | 5.4          | 6.9          | 6.2          | 6.7 |
| Median score                | 7.5          | 8.0          | 5.0          | 7.0          | 6.0          |     |
| MADM                        | 1.1          | 0.8          | 1.5          | 1.3          | 1.3          |     |
| Agreement                   | Moderate     | High         | Low          | Moderate     | Moderate     |     |
|                             | Consensus    | No consensus | No consensus | No consensus | No consensus |     |
| <b>Round 3</b>              |              |              |              |              |              |     |
| Mean score                  | 7.5          | 8.0          | 6.0          | 7.1          | 6.0          | 6.9 |
| Median score                | 7.0          | 8.0          | 6.5          | 7.0          | 6.0          |     |
| MADM                        | 1.1          | 0.6          | 1.7          | 1.2          | 1.3          |     |
| Agreement                   | Moderate     | High         | Low          | Moderate     | Moderate     |     |
|                             | Consensus    | Consensus    | No consensus | No consensus | No consensus |     |
| <b>84- Food environment</b> |              |              |              |              |              |     |
| <b>Round 1</b>              |              |              |              |              |              |     |
| Mean score                  | 7.6          | 6.5          | 7.2          | 8.4          | 7.4          | 7.4 |
| Median score                | 8            | 7            | 7            | 9            | 7            |     |
| MADM                        | 1.1          | 1.3          | 1.2          | 0.6          | 1.1          |     |
| Agreement                   | High         | Moderate     | Moderate     | High         | Moderate     |     |
|                             | Consensus    | No consensus | Consensus    | Consensus    | Consensus    |     |
| <b>Round 2</b>              |              |              |              |              |              |     |
| Mean score                  | 7.9          | 7.3          | 7.4          | 8.4          | 7.7          | 7.7 |
| Median score                | 8            | 7            | 8            | 9            | 8            |     |
| MADM                        | 0.9          | 1.1          | 0.8          | 0.6          | 1.0          |     |
| Agreement                   | High         | Moderate     | High         | High         | High         |     |
|                             | Consensus    | Consensus    | No consensus | Consensus    | Consensus    |     |



|                                    |            |           |           |            |            |     |
|------------------------------------|------------|-----------|-----------|------------|------------|-----|
| <b>Round 3</b>                     |            |           |           |            |            |     |
| Mean score                         | 7.8        | 8.0       | 7.8       | 8.7        | 7.8        | 8.0 |
| Median score                       | 8.0        | 8.0       | 8.0       | 9.0        | 8.0        |     |
| MADM                               | 0.9        | 0.9       | 0.2       | 0.3        | 0.9        |     |
| Agreement                          | High       | High      | High      | High       | High       |     |
|                                    | Consensus  | Consensus | Consensus | Consensus  | Consensus  |     |
| <b>85- Household food security</b> |            |           |           |            |            |     |
| <b>Round 1</b>                     |            |           |           |            |            |     |
| Mean score                         | 8.0        | 7.5       | 7.9       | 8.2        | 7.6        | 7.8 |
| Median score                       | 8          | 8         | 9         | 9          | 7          |     |
| MADM                               | 1.0        | 0.9       | 1.1       | 0.9        | 1.1        |     |
| Agreement                          | High       | High      | Moderate  | High       | High       |     |
|                                    | Consensus  | Consensus | Consensus | Consensus  | Consensus  |     |
| <b>Round 2</b>                     |            |           |           |            |            |     |
| Mean score                         | 8.3        | 7.8       | 7.7       | 8.5        | 7.7        | 8.0 |
| Median score                       | 9          | 9         | 8         | 9          | 8          |     |
| MADM                               | 0.7        | 1.2       | 1.2       | 0.5        | 1.1        |     |
| Agreement                          | High       | Moderate  | Moderate  | High       | High       |     |
|                                    | Consensus  | Consensus | Consensus | Consensus  | Consensus  |     |
| <b>Round 3</b>                     |            |           |           |            |            |     |
| Mean score                         | 8.5        | 8.3       | 8.0       | 8.5        | 7.9        | 8.2 |
| Median score                       | 9          | 9         | 8         | 9          | 8          |     |
| MADM                               | 0.5        | 0.7       | 0.7       | 0.5        | 1.0        |     |
| Agreement                          | High       | High      | High      | High       | High       |     |
|                                    | Consensus  | Consensus | Consensus | Consensus  | Consensus  |     |
| <b>86- Family meal environment</b> |            |           |           |            |            |     |
| <b>Round 1</b>                     |            |           |           |            |            |     |
| Mean score                         | <b>7.8</b> | 6.9       | 7.1       | <b>7.7</b> | <b>7.3</b> | 7.4 |
| Median score                       | <b>8.0</b> | 7.0       | 7.0       | <b>8.0</b> | <b>7.0</b> |     |

|                                                                  |              |              |              |              |              |     |
|------------------------------------------------------------------|--------------|--------------|--------------|--------------|--------------|-----|
| MADM                                                             | 1.0          | 1.3          | 1.4          | 0.9          | 1.0          |     |
| Agreement                                                        | High         | Moderate     | Moderate     | High         | High         |     |
|                                                                  | Consensus    | No consensus | No consensus | Consensus    | Consensus    |     |
| <b>Round 2</b>                                                   |              |              |              |              |              |     |
| Mean score                                                       | 8.1          | 7.8          | 7.2          | 7.6          | 7.4          | 7.6 |
| Median score                                                     | 8.0          | 8.0          | 7.0          | 8.0          | 7.0          |     |
| MADM                                                             | 0.8          | 1.0          | 0.8          | 1.0          | 0.9          |     |
| Agreement                                                        | High         | High         | High         | High         | High         |     |
|                                                                  | Consensus    | Consensus    | Consensus    | No consensus | Consensus    |     |
| <b>Round 3</b>                                                   |              |              |              |              |              |     |
| Mean score                                                       | 8.0          | 8.3          | 8.0          | 7.7          | 7.6          | 7.9 |
| Median score                                                     | 8.0          | 8.5          | 8.0          | 7.0          | 7.0          |     |
| MADM                                                             | 0.9          | 0.7          | 0.7          | 1.1          | 0.9          |     |
| Agreement                                                        | High         | High         | High         | Moderate     | High         |     |
|                                                                  | Consensus    | Consensus    | Consensus    | No consensus | Consensus    |     |
| <b>87- Early childhood education and care (ECEC) environment</b> |              |              |              |              |              |     |
| <b>Round 1</b>                                                   |              |              |              |              |              |     |
| Mean score                                                       | 7.2          | 7.3          | 7.2          | 7.9          | 7.0          | 7.3 |
| Median score                                                     | 7.0          | 7.0          | 7.0          | 8.0          | 7.0          |     |
| MADM                                                             | 1.3          | 1.2          | 1.3          | 0.8          | 1.1          |     |
| Agreement                                                        | Moderate     | Moderate     | Moderate     | High         | High         |     |
|                                                                  | No consensus | No consensus | No consensus | Consensus    | No consensus |     |
| <b>Round 2</b>                                                   |              |              |              |              |              |     |
| Mean score                                                       | 7.4          | 7.7          | 7.5          | 8.0          | 7.1          | 7.5 |
| Median score                                                     | 7.0          | 7.5          | 7.0          | 8.0          | 7.0          |     |
| MADM                                                             | 1.1          | 0.7          | 1.0          | 0.7          | 0.9          |     |
| Agreement                                                        | Moderate     | High         | High         | High         | High         |     |
|                                                                  | No consensus | Consensus    | Consensus    | Consensus    | No consensus |     |
| <b>Round 3</b>                                                   |              |              |              |              |              |     |

|                                                                |              |                  |                  |                  |              |     |
|----------------------------------------------------------------|--------------|------------------|------------------|------------------|--------------|-----|
| Mean score                                                     | 7.3          | <b>8.0</b>       | <b>8.2</b>       | <b>8.1</b>       | 7.2          | 7.7 |
| Median score                                                   | 7.0          | <b>8.0</b>       | <b>8.5</b>       | <b>8.5</b>       | 7.0          |     |
| MADM                                                           | 1.1          | <b>0.7</b>       | <b>0.8</b>       | <b>0.9</b>       | 0.8          |     |
| Agreement                                                      | High         | <b>High</b>      | <b>High</b>      | <b>High</b>      | High         |     |
|                                                                | No consensus | <b>Consensus</b> | <b>Consensus</b> | <b>Consensus</b> | No consensus |     |
| <b>88- Healthcare environment</b>                              |              |                  |                  |                  |              |     |
| <b>Round 1</b>                                                 |              |                  |                  |                  |              |     |
| Mean score                                                     | 6.4          | 6.6              | 6.4              | 6.3              | 6.0          | 6.3 |
| Median score                                                   | 6.0          | 7.0              | 7.0              | 6.0              | 6.0          |     |
| MADM                                                           | 1.4          | 0.9              | 2.0              | 1.5              | 1.5          |     |
| Agreement                                                      | Moderate     | High             | Low              | Low              | Low          |     |
|                                                                | No consensus | No consensus     | No consensus     | No consensus     | No consensus |     |
| <b>Round 2</b>                                                 |              |                  |                  |                  |              |     |
| Mean score                                                     | 6.8          | 7.0              | 6.1              | 5.9              | 5.9          | 6.3 |
| Median score                                                   | 7.0          | 7.0              | 6.5              | 5.5              | 6.0          |     |
| MADM                                                           | 1.1          | 0.7              | 1.6              | 1.3              | 1.3          |     |
| Agreement                                                      | Moderate     | High             | Low              | Moderate         | Moderate     |     |
|                                                                | No consensus | No consensus     | No consensus     | No consensus     | No consensus |     |
| <b>Round 3</b>                                                 |              |                  |                  |                  |              |     |
| Mean score                                                     | 6.6          | <b>8.0</b>       | 6.3              | 6.4              | 5.8          | 6.6 |
| Median score                                                   | 6.0          | <b>8.0</b>       | 7.0              | 7.0              | 6.0          |     |
| MADM                                                           | 1.0          | <b>0.7</b>       | 1.3              | 1.2              | 1.2          |     |
| Agreement                                                      | High         | <b>High</b>      | Moderate         | Moderate         | Moderate     |     |
|                                                                | No consensus | <b>Consensus</b> | No consensus     | No consensus     | No consensus |     |
| <b>89- Child internalising and/or externalising behaviours</b> |              |                  |                  |                  |              |     |
| <b>Round 1</b>                                                 |              |                  |                  |                  |              |     |
| Mean score                                                     | 6.3          | 6.6              | 6.3              | 5.4              | 5.6          | 6.0 |
| Median score                                                   | 6.0          | 6.5              | 7.0              | 6.0              | 6.0          |     |
| MADM                                                           | 1.5          | 1.3              | 2.0              | 1.5              | 1.3          |     |

|                                     |              |              |              |              |              |     |
|-------------------------------------|--------------|--------------|--------------|--------------|--------------|-----|
| Agreement                           | Low          | Moderate     | Low          | Low          | Moderate     |     |
|                                     | No consensus | No consensus | No consensus | No consensus | No consensus |     |
| <b>Round 2</b>                      |              |              |              |              |              |     |
| Mean score                          | 6.4          | 7.0          | 5.9          | 5.5          | 5.6          | 6.1 |
| Median score                        | 6.5          | 7.5          | 6.0          | 6.0          | 6.0          |     |
| MADM                                | 1.1          | 1.2          | 1.4          | 0.9          | 1.0          |     |
| Agreement                           | High         | Moderate     | Moderate     | High         | High         |     |
|                                     | No consensus | No consensus | No consensus | No consensus | No consensus |     |
| <b>Round 3</b>                      |              |              |              |              |              |     |
| Mean score                          | 6.5          | 7.0          | 6.8          | 5.7          | 5.7          | 6.3 |
| Median score                        | 6.0          | 7.0          | 7.0          | 6.0          | 6.0          |     |
| MADM                                | 0.9          | 0.7          | 1.4          | 1.0          | 0.8          |     |
| Agreement                           | High         | High         | Moderate     | High         | High         |     |
|                                     | No consensus | No consensus | No consensus | No consensus | No consensus |     |
| <b>90- Child emotion regulation</b> |              |              |              |              |              |     |
| <b>Round 1</b>                      |              |              |              |              |              |     |
| Mean score                          | 6.7          | 6.8          | 6.7          | 5.8          | 6.1          | 6.4 |
| Median score                        | 7.0          | 7.0          | 7.0          | 6.0          | 6.0          |     |
| MADM                                | 1.3          | 1.3          | 1.7          | 1.6          | 1.3          |     |
| Agreement                           | Moderate     | Moderate     | Low          | Low          | Moderate     |     |
|                                     | No consensus | No consensus | No consensus | No consensus | No consensus |     |
| <b>Round 2</b>                      |              |              |              |              |              |     |
| Mean score                          | 6.9          | 6.8          | 6.5          | 6.1          | 6.0          | 6.5 |
| Median score                        | 7.0          | 7.0          | 6.0          | 6.0          | 6.0          |     |
| MADM                                | 1.2          | 1.2          | 1.2          | 1.3          | 1.2          |     |
| Agreement                           | Moderate     | Moderate     | Moderate     | Moderate     | Moderate     |     |
|                                     | No consensus | No consensus | No consensus | No consensus | No consensus |     |
| <b>Round 3</b>                      |              |              |              |              |              |     |
| Mean score                          | 6.9          | 6.7          | 6.8          | 6.5          | 6.0          | 6.6 |

|                                        |              |              |                  |              |              |     |
|----------------------------------------|--------------|--------------|------------------|--------------|--------------|-----|
| Median score                           | 7.0          | 7.0          | 7.0              | 6.5          | 6.0          |     |
| MADM                                   | 1.2          | 0.7          | 1.0              | 1.5          | 1.1          |     |
| Agreement                              | Moderate     | High         | High             | Low          | High         |     |
|                                        | No consensus | No consensus | No consensus     | No consensus | No consensus |     |
| <b>91- Child emotional development</b> |              |              |                  |              |              |     |
| <b>Round 1</b>                         |              |              |                  |              |              |     |
| Mean score                             | 6.4          | 6.8          | 6.9              | 5.5          | 5.7          | 6.3 |
| Median score                           | 6.0          | 8.0          | 7.0              | 6.0          | 6.0          |     |
| MADM                                   | 1.3          | 1.4          | 1.6              | 1.8          | 1.3          |     |
| Agreement                              | Moderate     | Moderate     | Low              | Low          | Moderate     |     |
|                                        | No consensus | No consensus | No consensus     | No consensus | No consensus |     |
| <b>Round 2</b>                         |              |              |                  |              |              |     |
| Mean score                             | 6.5          | 7.3          | 6.5              | 5.7          | 5.7          | 6.3 |
| Median score                           | 6.0          | 8.0          | 7.0              | 5.5          | 6.0          |     |
| MADM                                   | 1.3          | 0.9          | 1.2              | 1.3          | 1.2          |     |
| Agreement                              | Moderate     | High         | Moderate         | Moderate     | Moderate     |     |
|                                        | No consensus | No consensus | No consensus     | No consensus | No consensus |     |
| <b>Round 3</b>                         |              |              |                  |              |              |     |
| Mean score                             | 6.6          | 7.2          | <b>7.7</b>       | 6.3          | 5.7          | 6.7 |
| Median score                           | 7.0          | 7.5          | <b>8.0</b>       | 6.0          | 6.0          |     |
| MADM                                   | 1.2          | 1.2          | <b>1.0</b>       | 1.3          | 1.1          |     |
| Agreement                              | Moderate     | Moderate     | <b>High</b>      | Moderate     | High         |     |
|                                        | No consensus | No consensus | <b>Consensus</b> | No consensus | No consensus |     |
| <b>92- Child school readiness</b>      |              |              |                  |              |              |     |
| <b>Round 1</b>                         |              |              |                  |              |              |     |
| Mean score                             | 5.5          | 6.0          | 5.7              | 5.2          | 5.2          | 5.5 |
| Median score                           | 6.0          | 6.0          | 6.0              | 5.0          | 5.0          |     |
| MADM                                   | 1.6          | 1.1          | 1.7              | 1.6          | 1.5          |     |
| Agreement                              | Low          | Moderate     | Low              | Low          | Low          |     |

|                            |                  |                  |                  |                  |              |     |
|----------------------------|------------------|------------------|------------------|------------------|--------------|-----|
|                            | No consensus     | No consensus     | No consensus     | No consensus     | No consensus |     |
| <b>Round 2</b>             |                  |                  |                  |                  |              |     |
| Mean score                 | 5.5              | 6.3              | 5.5              | 5.3              | 5.2          | 5.6 |
| Median score               | 5.5              | 6.0              | 6.0              | 5.0              | 5.0          |     |
| MADM                       | 1.5              | 0.9              | 1.2              | 1.0              | 1.5          |     |
| Agreement                  | Low              | High             | Moderate         | High             | Low          |     |
|                            | No consensus     | No consensus     | No consensus     | No consensus     | No consensus |     |
| <b>Round 3</b>             |                  |                  |                  |                  |              |     |
| Mean score                 | 5.4              | 6.3              | 6.5              | 5.6              | 5.2          | 5.8 |
| Median score               | 6.0              | 6.0              | 6.5              | 5.0              | 5.0          |     |
| MADM                       | 1.5              | 0.7              | 1.2              | 1.2              | 1.3          |     |
| Agreement                  | Low              | High             | Moderate         | Moderate         | Moderate     |     |
|                            | No consensus     | No consensus     | No consensus     | No consensus     | No consensus |     |
| <b>93- Child wellbeing</b> |                  |                  |                  |                  |              |     |
| <b>Round 1</b>             |                  |                  |                  |                  |              |     |
| Mean score                 | 6.9              | <b>7.6</b>       | 7.5              | 7.0              | 6.5          | 7.1 |
| Median score               | 7.0              | <b>8.0</b>       | 8.0              | 7.0              | 7.0          |     |
| MADM                       | 1.4              | <b>0.8</b>       | 1.2              | 1.5              | 1.3          |     |
| Agreement                  | Low              | <b>High</b>      | High             | Low              | Moderate     |     |
|                            | No consensus     | <b>Consensus</b> | No consensus     | No consensus     | No consensus |     |
| <b>Round 2</b>             |                  |                  |                  |                  |              |     |
| Mean score                 | <b>7.3</b>       | <b>7.7</b>       | <b>7.8</b>       | <b>7.6</b>       | 6.8          | 7.5 |
| Median score               | <b>8.0</b>       | <b>8.0</b>       | <b>8.0</b>       | <b>8.0</b>       | 7.0          |     |
| MADM                       | <b>1.0</b>       | <b>0.6</b>       | <b>0.7</b>       | <b>0.9</b>       | 1.0          |     |
| Agreement                  | <b>High</b>      | <b>High</b>      | <b>High</b>      | <b>High</b>      | High         |     |
|                            | <b>Consensus</b> | <b>Consensus</b> | <b>Consensus</b> | <b>Consensus</b> | No consensus |     |
| <b>Round 3</b>             |                  |                  |                  |                  |              |     |
| Mean score                 | <b>7.2</b>       | <b>7.8</b>       | <b>8.8</b>       | <b>7.7</b>       | 6.9          | 7.7 |
| Median score               | <b>8.0</b>       | <b>8.0</b>       | <b>9.0</b>       | <b>8.0</b>       | 7.0          |     |

|                                        |              |              |              |              |              |     |
|----------------------------------------|--------------|--------------|--------------|--------------|--------------|-----|
| MADM                                   | 0.9          | 0.5          | 0.2          | 0.9          | 1.0          |     |
| Agreement                              | High         | High         | High         | High         | High         |     |
|                                        | Consensus    | Consensus    | Consensus    | Consensus    | No consensus |     |
| <b>94- Child attention control</b>     |              |              |              |              |              |     |
| <b>Round 1</b>                         |              |              |              |              |              |     |
| Mean score                             | 5.8          | 6.2          | 5.7          | 5.3          | 5.4          | 5.7 |
| Median score                           | 6.0          | 6.0          | 6.0          | 4.0          | 5.0          |     |
| MADM                                   | 1.6          | 1.2          | 1.7          | 1.7          | 1.3          |     |
| Agreement                              | Low          | Moderate     | Low          | Low          | Moderate     |     |
|                                        | No consensus | No consensus | No consensus | No consensus | No consensus |     |
| <b>Round 2</b>                         |              |              |              |              |              |     |
| Mean score                             | 6.2          | 6.1          | 5.4          | 5.2          | 5.2          | 5.6 |
| Median score                           | 6.0          | 6.0          | 6.0          | 4.0          | 5.0          |     |
| MADM                                   | 1.5          | 0.9          | 1.2          | 1.4          | 1.2          |     |
| Agreement                              | Low          | High         | Moderate     | Moderate     | Moderate     |     |
|                                        | No consensus | No consensus | No consensus | No consensus | No consensus |     |
| <b>Round 3</b>                         |              |              |              |              |              |     |
| Mean score                             | 6.5          | 6.2          | 6.0          | 5.4          | 5.1          | 5.8 |
| Median score                           | 7.0          | 6.0          | 6.0          | 5.0          | 5.0          |     |
| MADM                                   | 1.5          | 0.8          | 0.7          | 1.3          | 1.0          |     |
| Agreement                              | Low          | High         | High         | Moderate     | High         |     |
|                                        | No consensus | No consensus | No consensus | No consensus | No consensus |     |
| <b>95- Child cognitive development</b> |              |              |              |              |              |     |
| <b>Round 1</b>                         |              |              |              |              |              |     |
| Mean score                             | 6.0          | 6.1          | 6.3          | 5.9          | 5.8          | 6.0 |
| Median score                           | 6.0          | 6.5          | 6.0          | 6.0          | 6.0          |     |
| MADM                                   | 1.5          | 1.6          | 1.7          | 2.0          | 1.3          |     |
| Agreement                              | Low          | Low          | Low          | Low          | Moderate     |     |
|                                        | No consensus | No consensus | No consensus | No consensus | No consensus |     |

|                                     |              |              |              |              |              |     |
|-------------------------------------|--------------|--------------|--------------|--------------|--------------|-----|
| <b>Round 2</b>                      |              |              |              |              |              |     |
| Mean score                          | 6.3          | 6.7          | 6.2          | 5.6          | 5.7          | 6.1 |
| Median score                        | 6.0          | 7.5          | 6.0          | 6.0          | 6.0          |     |
| MADM                                | 1.3          | 1.3          | 1.1          | 1.3          | 1.2          |     |
| Agreement                           | Moderate     | Moderate     | Moderate     | Moderate     | Moderate     |     |
|                                     | No consensus | No consensus | No consensus | No consensus | No consensus |     |
| <b>Round 3</b>                      |              |              |              |              |              |     |
| Mean score                          | 6.3          | 7.0          | 7.0          | 6.1          | 5.7          | 6.4 |
| Median score                        | 6.0          | 7.5          | 6.5          | 6.0          | 6.0          |     |
| MADM                                | 1.5          | 1.0          | 1.0          | 1.1          | 1.1          |     |
| Agreement                           | Low          | High         | High         | Moderate     | Moderate     |     |
|                                     | No consensus | No consensus | No consensus | No consensus | No consensus |     |
| <b>96- Child executive function</b> |              |              |              |              |              |     |
| <b>Round 1</b>                      |              |              |              |              |              |     |
| Mean score                          | 5.8          | 5.9          | 6.3          | 5.3          | 5.7          | 5.8 |
| Median score                        | 6.0          | 6.0          | 7.0          | 5.0          | 6.0          |     |
| MADM                                | 1.5          | 1.2          | 1.7          | 1.8          | 1.4          |     |
| Agreement                           | Low          | Moderate     | Low          | Low          | Moderate     |     |
|                                     | No consensus | No consensus | No consensus | No consensus | No consensus |     |
| <b>Round 2</b>                      |              |              |              |              |              |     |
| Mean score                          | 6.1          | 6.5          | 6.1          | 5.4          | 5.6          | 5.9 |
| Median score                        | 6.0          | 7.0          | 7.0          | 6.0          | 6.0          |     |
| MADM                                | 1.1          | 1.3          | 1.5          | 1.4          | 1.4          |     |
| Agreement                           | Moderate     | Moderate     | Low          | Moderate     | Moderate     |     |
|                                     | No consensus | No consensus | No consensus | No consensus | No consensus |     |
| <b>Round 3</b>                      |              |              |              |              |              |     |
| Mean score                          | 5.8          | 6.8          | 6.8          | 5.8          | 5.6          | 6.2 |
| Median score                        | 6.0          | 7.5          | 7.0          | 6.0          | 6.0          |     |
| MADM                                | 1.4          | 1.2          | 0.8          | 1.3          | 1.2          |     |



|                                              |              |                  |              |              |              |     |
|----------------------------------------------|--------------|------------------|--------------|--------------|--------------|-----|
| Agreement                                    | Moderate     | Moderate         | High         | Moderate     | Moderate     |     |
|                                              | No consensus | No consensus     | No consensus | No consensus | No consensus |     |
| <b>97- Child self-regulation</b>             |              |                  |              |              |              |     |
| <b>Round 1</b>                               |              |                  |              |              |              |     |
| Mean score                                   | 6.5          | 6.8              | 6.9          | 5.9          | 6.3          | 6.5 |
| Median score                                 | 7.0          | 7.0              | 7.0          | 6.0          | 7.0          |     |
| MADM                                         | 1.4          | 1.1              | 1.6          | 1.9          | 1.3          |     |
| Agreement                                    | Low          | High             | Low          | Low          | Moderate     |     |
|                                              | No consensus | No consensus     | No consensus | No consensus | No consensus |     |
| <b>Round 2</b>                               |              |                  |              |              |              |     |
| Mean score                                   | 6.8          | 7.2              | 6.7          | 6.5          | 6.4          | 6.7 |
| Median score                                 | 7.0          | 7.5              | 6.0          | 7.0          | 7.0          |     |
| MADM                                         | 1.2          | 1.0              | 1.5          | 1.1          | 1.2          |     |
| Agreement                                    | Moderate     | High             | Low          | High         | Moderate     |     |
|                                              | No consensus | No consensus     | No consensus | No consensus | No consensus |     |
| <b>Round 3</b>                               |              |                  |              |              |              |     |
| Mean score                                   | 7.1          | <b>7.2</b>       | 6.2          | 6.6          | 6.4          | 6.7 |
| Median score                                 | 7.0          | <b>7.0</b>       | 6.0          | 7.0          | 7.0          |     |
| MADM                                         | 1.2          | <b>0.5</b>       | 1.2          | 1.1          | 1.1          |     |
| Agreement                                    | Moderate     | <b>High</b>      | Moderate     | Moderate     | Moderate     |     |
|                                              | No consensus | <b>Consensus</b> | No consensus | No consensus | No consensus |     |
| <b>98- Child fundamental movement skills</b> |              |                  |              |              |              |     |
| <b>Round 1</b>                               |              |                  |              |              |              |     |
| Mean score                                   | 6.4          | 6.4              | 7.0          | 6.8          | 5.8          | 6.5 |
| Median score                                 | 6.0          | 6.0              | 7.0          | 7.0          | 6.0          |     |
| MADM                                         | 1.7          | 1.3              | 1.4          | 1.6          | 1.6          |     |
| Agreement                                    | Low          | Moderate         | Low          | Low          | Low          |     |
|                                              | No consensus | No consensus     | No consensus | No consensus | No consensus |     |
| <b>Round 2</b>                               |              |                  |              |              |              |     |

|                                                    |              |                  |                  |              |              |     |
|----------------------------------------------------|--------------|------------------|------------------|--------------|--------------|-----|
| Mean score                                         | 6.7          | <b>7.4</b>       | 7.0              | 6.4          | 5.8          | 6.7 |
| Median score                                       | 6.5          | <b>7.0</b>       | 7.0              | 6.0          | 6.0          |     |
| MADM                                               | 1.3          | <b>0.7</b>       | 0.7              | 1.1          | 1.6          |     |
| Agreement                                          | Moderate     | <b>High</b>      | High             | Moderate     | Low          |     |
|                                                    | No consensus | <b>Consensus</b> | No consensus     | No consensus | No consensus |     |
| <b>Round 3</b>                                     |              |                  |                  |              |              |     |
| Mean score                                         | 6.7          | <b>7.4</b>       | <b>7.4</b>       | 6.4          | 5.8          | 6.8 |
| Median score                                       | 6.0          | <b>7.0</b>       | <b>8.0</b>       | 6.0          | 6.0          |     |
| MADM                                               | 1.0          | <b>0.7</b>       | <b>0.6</b>       | 1.1          | 1.4          |     |
| Agreement                                          | High         | <b>High</b>      | <b>High</b>      | Moderate     | Moderate     |     |
|                                                    | No consensus | <b>Consensus</b> | <b>Consensus</b> | No consensus | No consensus |     |
| <b>99- Child activity preference or perception</b> |              |                  |                  |              |              |     |
| <b>Round 1</b>                                     |              |                  |                  |              |              |     |
| Mean score                                         | 6.9          | 6.8              | 6.7              | 6.1          | 5.9          | 6.5 |
| Median score                                       | 7.0          | 6.0              | 7.0              | 6.0          | 6.0          |     |
| MADM                                               | 1.0          | 0.9              | 1.1              | 1.5          | 1.2          |     |
| Agreement                                          | High         | High             | Moderate         | Low          | Moderate     |     |
|                                                    | No consensus | No consensus     | No consensus     | No consensus | No consensus |     |
| <b>Round 2</b>                                     |              |                  |                  |              |              |     |
| Mean score                                         | 6.8          | 7.2              | 6.5              | 6.2          | 6.0          | 6.5 |
| Median score                                       | 7.0          | 7.0              | 6.0              | 6.0          | 6.0          |     |
| MADM                                               | 0.9          | 1.4              | 0.8              | 1.1          | 1.1          |     |
| Agreement                                          | High         | Moderate         | High             | High         | Moderate     |     |
|                                                    | No consensus | No consensus     | No consensus     | No consensus | No consensus |     |
| <b>Round 3</b>                                     |              |                  |                  |              |              |     |
| Mean score                                         | 7.0          | 7.9              | 7.3              | 6.6          | 6.0          | 7.0 |
| Median score                                       | 7.0          | 8.0              | 8.0              | 7.0          | 6.0          |     |
| MADM                                               | 0.9          | 1.0              | 1.0              | 0.9          | 1.2          |     |
| Agreement                                          | High         | High             | High             | High         | Moderate     |     |

|                                   |              |              |              |              |              |     |
|-----------------------------------|--------------|--------------|--------------|--------------|--------------|-----|
|                                   | No consensus | No consensus | No consensus | No consensus | No consensus |     |
| <b>100- Child food preference</b> |              |              |              |              |              |     |
| <b>Round 1</b>                    |              |              |              |              |              |     |
| Mean score                        | 7.1          | 6.7          | 6.8          | 6.2          | 6.2          | 6.6 |
| Median score                      | 7.0          | 6.0          | 7.0          | 6.0          | 6.0          |     |
| MADM                              | 1.2          | 1.1          | 1.0          | 1.4          | 1.2          |     |
| Agreement                         | Moderate     | High         | High         | Moderate     | Moderate     |     |
|                                   | No consensus | No consensus | No consensus | No consensus | No consensus |     |
| <b>Round 2</b>                    |              |              |              |              |              |     |
| Mean score                        | 6.9          | 7.0          | 6.8          | 6.1          | 6.2          | 6.6 |
| Median score                      | 7.0          | 6.0          | 7.0          | 6.0          | 6.0          |     |
| MADM                              | 1.3          | 1.0          | 0.9          | 1.1          | 1.1          |     |
| Agreement                         | Moderate     | High         | High         | High         | Moderate     |     |
|                                   | No consensus | No consensus | No consensus | No consensus | No consensus |     |
| <b>Round 3</b>                    |              |              |              |              |              |     |
| Mean score                        | 7.5          | 7.4          | 6.2          | 6.4          | 6.2          | 6.7 |
| Median score                      | 7.0          | 8.0          | 6.0          | 6.0          | 6.0          |     |
| MADM                              | 1.3          | 1.1          | 0.8          | 1.3          | 1.1          |     |
| Agreement                         | Moderate     | Moderate     | High         | Moderate     | Moderate     |     |
|                                   | No consensus | No consensus | No consensus | No consensus | No consensus |     |
| <b>101- Child blood pressure</b>  |              |              |              |              |              |     |
| <b>Round 1</b>                    |              |              |              |              |              |     |
| Mean score                        | 5.4          | 6.2          | 6.2          | 5.0          | 5.7          | 5.7 |
| Median score                      | 6.0          | 7.0          | 6.0          | 5.0          | 6.0          |     |
| MADM                              | 1.4          | 1.1          | 1.6          | 1.4          | 1.5          |     |
| Agreement                         | Moderate     | High         | Low          | Moderate     | Low          |     |
|                                   | No consensus | No consensus | No consensus | No consensus | No consensus |     |
| <b>Round 2</b>                    |              |              |              |              |              |     |
| Mean score                        | 5.6          | 7.1          | 6.1          | 5.0          | 5.4          | 5.9 |

|                               |              |              |              |              |              |     |
|-------------------------------|--------------|--------------|--------------|--------------|--------------|-----|
| Median score                  | 6.0          | 7.0          | 6.0          | 4.5          | 5.5          |     |
| MADM                          | 1.0          | 1.0          | 1.7          | 1.3          | 1.5          |     |
| Agreement                     | High         | High         | Low          | Moderate     | Low          |     |
|                               | No consensus | No consensus | No consensus | No consensus | No consensus |     |
| <b>Round 3</b>                |              |              |              |              |              |     |
| Mean score                    | 5.8          | 8.3          | 6.2          | 5.0          | 5.2          | 6.1 |
| Median score                  | 6.0          | 8.5          | 6.0          | 4.5          | 5.0          |     |
| MADM                          | 0.9          | 1.3          | 2.2          | 1.3          | 1.4          |     |
| Agreement                     | High         | Moderate     | Low          | Moderate     | Low          |     |
|                               | No consensus | No consensus | No consensus | No consensus | No consensus |     |
| <b>102- Child cholesterol</b> |              |              |              |              |              |     |
| <b>Round 1</b>                |              |              |              |              |              |     |
| Mean score                    | 5.6          | 6.4          | 6.0          | 4.7          | 5.8          | 5.7 |
| Median score                  | 6.0          | 7.0          | 6.0          | 5.0          | 6.0          |     |
| MADM                          | 1.6          | 0.9          | 1.8          | 1.4          | 1.6          |     |
| Agreement                     | Low          | High         | Low          | Low          | Low          |     |
|                               | No consensus | No consensus | No consensus | No consensus | No consensus |     |
| <b>Round 2</b>                |              |              |              |              |              |     |
| Mean score                    | 5.7          | 7.4          | 5.9          | 4.8          | 5.2          | 5.8 |
| Median score                  | 6.0          | 7.0          | 6.0          | 5.0          | 5.0          |     |
| MADM                          | 1.3          | 0.7          | 1.9          | 1.2          | 1.5          |     |
| Agreement                     | Moderate     | High         | Low          | Moderate     | Low          |     |
|                               | No consensus | No consensus | No consensus | No consensus | No consensus |     |
| <b>Round 3</b>                |              |              |              |              |              |     |
| Mean score                    | 6.0          | 7.2          | 5.5          | 4.9          | 5.1          | 5.7 |
| Median score                  | 6.0          | 7.0          | 5.0          | 4.5          | 5.0          |     |
| MADM                          | 1.2          | 1.0          | 1.5          | 1.4          | 1.4          |     |
| Agreement                     | Moderate     | High         | Low          | Moderate     | Moderate     |     |
|                               | No consensus | No consensus | No consensus | No consensus | No consensus |     |

| <b>103- Child glucose</b>    |              |              |              |              |              |     |
|------------------------------|--------------|--------------|--------------|--------------|--------------|-----|
| <b>Round 1</b>               |              |              |              |              |              |     |
| Mean score                   | 5.9          | 6.4          | 6.8          | 5.3          | 5.7          | 6.0 |
| Median score                 | 6.0          | 7.0          | 7.0          | 5.0          | 6.0          |     |
| MADM                         | 1.6          | 0.9          | 1.7          | 1.4          | 1.7          |     |
| Agreement                    | Low          | High         | Low          | Moderate     | Low          |     |
|                              | No consensus | No consensus | No consensus | No consensus | No consensus |     |
| <b>Round 2</b>               |              |              |              |              |              |     |
| Mean score                   | 6.7          | 7.0          | 6.5          | 5.4          | 5.5          | 6.2 |
| Median score                 | 7.0          | 7.0          | 7.0          | 5.0          | 5.5          |     |
| MADM                         | 1.1          | 0.5          | 1.7          | 1.2          | 1.6          |     |
| Agreement                    | Moderate     | High         | Low          | Moderate     | Low          |     |
|                              | No consensus | No consensus | No consensus | No consensus | No consensus |     |
| <b>Round 3</b>               |              |              |              |              |              |     |
| Mean score                   | 6.5          | 6.8          | 6.4          | 5.1          | 5.4          | 6.1 |
| Median score                 | 6.0          | 7.0          | 7.0          | 5.0          | 5.0          |     |
| MADM                         | 1.2          | 0.2          | 2.2          | 1.1          | 1.4          |     |
| Agreement                    | Moderate     | High         | Low          | Moderate     | Moderate     |     |
|                              | No consensus | No consensus | No consensus | No consensus | No consensus |     |
| <b>104- Child hemoglobin</b> |              |              |              |              |              |     |
| <b>Round 1</b>               |              |              |              |              |              |     |
| Mean score                   | 5.5          | 5.9          | 5.6          | 4.8          | 5.4          | 5.4 |
| Median score                 | 6.0          | 7.0          | 6.0          | 5.0          | 5.0          |     |
| MADM                         | 1.7          | 1.3          | 1.8          | 1.4          | 1.7          |     |
| Agreement                    | Low          | Moderate     | Low          | Moderate     | Low          |     |
|                              | No consensus | No consensus | No consensus | No consensus | No consensus |     |
| <b>Round 2</b>               |              |              |              |              |              |     |
| Mean score                   | 5.5          | 7.0          | 5.4          | 4.8          | 5.1          | 5.6 |
| Median score                 | 6.0          | 7.0          | 6.0          | 5.0          | 5.0          |     |

|                                                         |              |              |              |              |              |     |
|---------------------------------------------------------|--------------|--------------|--------------|--------------|--------------|-----|
| MADM                                                    | 1.5          | 0.4          | 1.9          | 1.3          | 1.5          |     |
| Agreement                                               | Low          | High         | Low          | Moderate     | Low          |     |
|                                                         | No consensus | No consensus | No consensus | No consensus | No consensus |     |
| <b>Round 3</b>                                          |              |              |              |              |              |     |
| Mean score                                              | 5.5          | 7.0          | 5.8          | 5.4          | 4.7          | 5.7 |
| Median score                                            | 5.0          | 7.0          | 5.5          | 5.0          | 4.5          |     |
| MADM                                                    | 1.7          | 0.5          | 1.8          | 1.9          | 1.5          |     |
| Agreement                                               | Low          | High         | Low          | Low          | Low          |     |
|                                                         | No consensus | No consensus | No consensus | No consensus | No consensus |     |
| <b>105- Child lipids</b>                                |              |              |              |              |              |     |
| <b>Round 1</b>                                          |              |              |              |              |              |     |
| Mean score                                              | 5.4          | 5.9          | 5.9          | 5.1          | 5.8          | 5.6 |
| Median score                                            | 6.0          | 7.0          | 6.0          | 5.0          | 6.0          |     |
| MADM                                                    | 1.7          | 1.3          | 1.9          | 1.4          | 1.0          |     |
| Agreement                                               | Low          | Moderate     | Low          | Moderate     | High         |     |
|                                                         | No consensus | No consensus | No consensus | No consensus | No consensus |     |
| <b>Round 2</b>                                          |              |              |              |              |              |     |
| Mean score                                              | 5.7          | 6.4          | 5.4          | 5.2          | 5.4          | 5.6 |
| Median score                                            | 6.0          | 7.0          | 6.0          | 5.0          | 5.0          |     |
| MADM                                                    | 1.0          | 0.6          | 1.4          | 1.2          | 1.6          |     |
| Agreement                                               | High         | High         | Low          | Moderate     | Low          |     |
|                                                         | No consensus | No consensus | No consensus | No consensus | No consensus |     |
| <b>Round 3</b>                                          |              |              |              |              |              |     |
| Mean score                                              | 5.8          | 6.3          | 5.3          | 4.8          | 5.2          | 5.4 |
| Median score                                            | 6.0          | 6.5          | 5.5          | 4.5          | 5.0          |     |
| MADM                                                    | 0.9          | 0.8          | 1.3          | 1.3          | 1.5          |     |
| Agreement                                               | High         | High         | Moderate     | Moderate     | Low          |     |
|                                                         | No consensus | No consensus | No consensus | No consensus | No consensus |     |
| <b>106- Child metabolic and inflammatory parameters</b> |              |              |              |              |              |     |

|                                                  |              |                  |              |              |              |     |
|--------------------------------------------------|--------------|------------------|--------------|--------------|--------------|-----|
| <b>Round 1</b>                                   |              |                  |              |              |              |     |
| Mean score                                       | 5.8          | 6.3              | 6.3          | 4.9          | 6.3          | 5.9 |
| Median score                                     | 6.0          | 7.0              | 6.0          | 5.0          | 6.0          |     |
| MADM                                             | 1.5          | 1.2              | 1.7          | 1.6          | 1.6          |     |
| Agreement                                        | Low          | Moderate         | Low          | Low          | Low          |     |
|                                                  | No consensus | No consensus     | No consensus | No consensus | No consensus |     |
| <b>Round 2</b>                                   |              |                  |              |              |              |     |
| Mean score                                       | 6.1          | 6.8              | 5.6          | 5.2          | 5.5          | 5.9 |
| Median score                                     | 6.0          | 7.0              | 6.0          | 5.0          | 6.0          |     |
| MADM                                             | 0.9          | 0.6              | 1.4          | 1.2          | 1.4          |     |
| Agreement                                        | High         | High             | Moderate     | Moderate     | Low          |     |
|                                                  | No consensus | No consensus     | No consensus | No consensus | No consensus |     |
| <b>Round 3</b>                                   |              |                  |              |              |              |     |
| Mean score                                       | 6.2          | 6.3              | 5.8          | 5.1          | 5.3          | 5.7 |
| Median score                                     | 6.0          | 7.0              | 6.5          | 5.0          | 5.5          |     |
| MADM                                             | 0.6          | 0.7              | 1.3          | 1.1          | 1.5          |     |
| Agreement                                        | High         | High             | Moderate     | Moderate     | Low          |     |
|                                                  | No consensus | No consensus     | No consensus | No consensus | No consensus |     |
| <b>107- Child health-related quality of life</b> |              |                  |              |              |              |     |
| <b>Round 1</b>                                   |              |                  |              |              |              |     |
| Mean score                                       | 7.5          | <b>7.7</b>       | 7.5          | 6.8          | 6.8          | 7.2 |
| Median score                                     | 8.0          | <b>8.0</b>       | 7.5          | 7.0          | 7.0          |     |
| MADM                                             | 1.3          | <b>0.7</b>       | 1.2          | 1.4          | 1.3          |     |
| Agreement                                        | Moderate     | <b>High</b>      | Moderate     | Moderate     | Moderate     |     |
|                                                  | No consensus | <b>Consensus</b> | No consensus | No consensus | No consensus |     |
| <b>Round 2</b>                                   |              |                  |              |              |              |     |
| Mean score                                       | <b>7.6</b>   | <b>7.8</b>       | 7.2          | 7.0          | 6.9          | 7.3 |
| Median score                                     | <b>8.0</b>   | <b>8.0</b>       | 7.0          | 7.0          | 7.0          |     |
| MADM                                             | <b>0.9</b>   | <b>0.8</b>       | 0.9          | 1.3          | 1.1          |     |

|                                          |              |              |              |              |              |     |
|------------------------------------------|--------------|--------------|--------------|--------------|--------------|-----|
| Agreement                                | High         | High         | High         | Moderate     | Moderate     |     |
|                                          | Consensus    | Consensus    | No consensus | No consensus | No consensus |     |
| <b>Round 3</b>                           |              |              |              |              |              |     |
| Mean score                               | 7.7          | 8.1          | 7.7          | 7.3          | 7.0          | 7.6 |
| Median score                             | 7.0          | 8.0          | 7.5          | 7.5          | 7.0          |     |
| MADM                                     | 0.8          | 0.4          | 1.0          | 1.3          | 1.0          |     |
| Agreement                                | High         | High         | High         | Moderate     | High         |     |
|                                          | Consensus    | Consensus    | Consensus    | No consensus | No consensus |     |
| <b>108- Economic evaluation</b>          |              |              |              |              |              |     |
| <b>Round 1</b>                           |              |              |              |              |              |     |
| Mean score                               | 6.8          | 6.1          | 6.3          | 6.9          | 6.9          | 6.6 |
| Median score                             | 7.0          | 6.0          | 7.0          | 7.5          | 7.0          |     |
| MADM                                     | 1.5          | 1.2          | 1.4          | 1.6          | 1.2          |     |
| Agreement                                | Low          | Moderate     | Moderate     | Low          | Moderate     |     |
|                                          | No consensus | No consensus | No consensus | No consensus | No consensus |     |
| <b>Round 2</b>                           |              |              |              |              |              |     |
| Mean score                               | 6.9          | 6.9          | 6.2          | 7.1          | 7.0          | 6.8 |
| Median score                             | 7.0          | 7.0          | 6.0          | 7.0          | 7.0          |     |
| MADM                                     | 1.1          | 0.6          | 0.9          | 1.1          | 0.9          |     |
| Agreement                                | Moderate     | High         | High         | High         | High         |     |
|                                          | No consensus | No consensus | No consensus | No consensus | No consensus |     |
| <b>Round 3</b>                           |              |              |              |              |              |     |
| Mean score                               | 7.3          | 7.1          | 6.2          | 6.9          | 7.1          | 6.9 |
| Median score                             | 8.0          | 7.0          | 6.0          | 7.0          | 7.0          |     |
| MADM                                     | 0.9          | 0.7          | 0.6          | 0.6          | 0.9          |     |
| Agreement                                | High         | High         | High         | High         | High         |     |
|                                          | No consensus | No consensus | No consensus | No consensus | No consensus |     |
| <b>109- Child healthcare utilisation</b> |              |              |              |              |              |     |
| <b>Round 1</b>                           |              |              |              |              |              |     |



|                               |              |              |              |                  |              |     |
|-------------------------------|--------------|--------------|--------------|------------------|--------------|-----|
| Mean score                    | 6.9          | 6.3          | 6.4          | 6.2              | 6.1          | 6.4 |
| Median score                  | 7.0          | 7.0          | 7.0          | 6.0              | 6.0          |     |
| MADM                          | 1.4          | 1.2          | 1.5          | 1.4              | 1.4          |     |
| Agreement                     | Moderate     | Moderate     | Low          | Moderate         | Low          |     |
|                               | No consensus | No consensus | No consensus | No consensus     | No consensus |     |
| <b>Round 2</b>                |              |              |              |                  |              |     |
| Mean score                    | 6.8          | 6.4          | 5.8          | 5.9              | 6.2          | 6.2 |
| Median score                  | 7.0          | 6.0          | 6.0          | 6.0              | 6.0          |     |
| MADM                          | 1.1          | 0.9          | 0.8          | 0.9              | 1.2          |     |
| Agreement                     | Moderate     | High         | High         | High             | Moderate     |     |
|                               | No consensus | No consensus | No consensus | No consensus     | No consensus |     |
| <b>Round 3</b>                |              |              |              |                  |              |     |
| Mean score                    | 7.0          | 6.5          | 6.0          | 5.9              | 6.2          | 6.3 |
| Median score                  | 7.0          | 6.5          | 6.0          | 6.0              | 6.0          |     |
| MADM                          | 1.3          | 0.8          | 0.7          | 0.8              | 1.2          |     |
| Agreement                     | Moderate     | High         | High         | High             | Moderate     |     |
|                               | No consensus | No consensus | No consensus | No consensus     | No consensus |     |
| <b>110- Intervention cost</b> |              |              |              |                  |              |     |
| <b>Round 1</b>                |              |              |              |                  |              |     |
| Mean score                    | 6.8          | 6.6          | 6.3          | <b>7.7</b>       | 6.9          | 6.8 |
| Median score                  | 7.0          | 7.0          | 6.0          | <b>8.0</b>       | 7.0          |     |
| MADM                          | 1.6          | 1.2          | 1.5          | <b>1.2</b>       | 1.1          |     |
| Agreement                     | Low          | Moderate     | Low          | <b>Moderate</b>  | Moderate     |     |
|                               | No consensus | No consensus | No consensus | <b>Consensus</b> | No consensus |     |
| <b>Round 2</b>                |              |              |              |                  |              |     |
| Mean score                    | 7.1          | <b>7.4</b>   | 6.3          | <b>8.0</b>       | 7.0          | 7.2 |
| Median score                  | 7.0          | <b>7.0</b>   | 6.0          | <b>9.0</b>       | 7.0          |     |
| MADM                          | 1.2          | <b>0.9</b>   | 1.1          | <b>1.0</b>       | 0.9          |     |
| Agreement                     | Moderate     | <b>High</b>  | Moderate     | <b>High</b>      | High         |     |

|                                 |                  |                  |                  |                  |                  |     |
|---------------------------------|------------------|------------------|------------------|------------------|------------------|-----|
|                                 | No consensus     | <b>Consensus</b> | No consensus     | <b>Consensus</b> | No consensus     |     |
| <b>Round 3</b>                  |                  |                  |                  |                  |                  |     |
| Mean score                      | <b>7.6</b>       | 7.1              | 6.7              | <b>7.8</b>       | <b>7.2</b>       | 7.3 |
| Median score                    | <b>8.0</b>       | 7.0              | 7.0              | <b>8.0</b>       | <b>7.0</b>       |     |
| MADM                            | <b>0.9</b>       | 0.7              | 1.0              | <b>1.2</b>       | <b>0.8</b>       |     |
| Agreement                       | <b>High</b>      | High             | High             | <b>Moderate</b>  | <b>High</b>      |     |
|                                 | <b>Consensus</b> | No consensus     | No consensus     | <b>Consensus</b> | <b>Consensus</b> |     |
| <b>111- Child oral hygiene</b>  |                  |                  |                  |                  |                  |     |
| <b>Round 1</b>                  |                  |                  |                  |                  |                  |     |
| Mean score                      | 6.4              | 6.7              | 5.9              | 6.1              | 5.5              | 6.1 |
| Median score                    | 6.0              | 7.0              | 6.0              | 6.0              | 6.0              |     |
| MADM                            | 1.7              | 1.4              | 1.4              | 1.6              | 1.6              |     |
| Agreement                       | Low              | Moderate         | Moderate         | Low              | Low              |     |
|                                 | No consensus     | No consensus     | No consensus     | No consensus     | No consensus     |     |
| <b>Round 2</b>                  |                  |                  |                  |                  |                  |     |
| Mean score                      | 6.8              | 6.9              | 6.3              | 5.5              | 5.5              | 6.2 |
| Median score                    | 7.0              | 7.0              | 6.5              | 6.0              | 6.0              |     |
| MADM                            | 1.4              | 1.0              | 1.5              | 1.4              | 1.6              |     |
| Agreement                       | Moderate         | High             | Low              | Moderate         | Low              |     |
|                                 | No consensus     | No consensus     | No consensus     | No consensus     | No consensus     |     |
| <b>Round 3</b>                  |                  |                  |                  |                  |                  |     |
| Mean score                      | 7.3              | <b>7.5</b>       | <b>7.0</b>       | 5.8              | 5.5              | 6.6 |
| Median score                    | 8.0              | <b>7.0</b>       | <b>7.0</b>       | 6.0              | 5.0              |     |
| MADM                            | 1.4              | <b>0.5</b>       | <b>0.8</b>       | 1.6              | 1.5              |     |
| Agreement                       | Moderate         | <b>High</b>      | <b>High</b>      | Low              | Low              |     |
|                                 | No consensus     | <b>Consensus</b> | <b>Consensus</b> | No consensus     | No consensus     |     |
| <b>112- Child dental caries</b> |                  |                  |                  |                  |                  |     |
| <b>Round 1</b>                  |                  |                  |                  |                  |                  |     |
| Mean score                      | 6.9              | 6.8              | 6.0              | 6.2              | 5.7              | 6.3 |

|                                                       |              |              |              |              |              |     |
|-------------------------------------------------------|--------------|--------------|--------------|--------------|--------------|-----|
| Median score                                          | 7.0          | 7.0          | 6.0          | 6.0          | 6.0          |     |
| MADM                                                  | 1.6          | 1.6          | 1.4          | 1.7          | 1.7          |     |
| Agreement                                             | Low          | Low          | Moderate     | Low          | Low          |     |
|                                                       | No consensus | No consensus | No consensus | No consensus | No consensus |     |
| <b>Round 2</b>                                        |              |              |              |              |              |     |
| Mean score                                            | 7.1          | 6.9          | 6.7          | 5.8          | 5.6          | 6.4 |
| Median score                                          | 7.0          | 6.5          | 7.0          | 6.0          | 6.0          |     |
| MADM                                                  | 1.3          | 1.3          | 1.2          | 1.3          | 1.5          |     |
| Agreement                                             | Moderate     | Moderate     | Moderate     | Moderate     | Low          |     |
|                                                       | No consensus | No consensus | No consensus | No consensus | No consensus |     |
| <b>Round 3</b>                                        |              |              |              |              |              |     |
| Mean score                                            | 7.5          | 7.8          | 7.2          | 5.8          | 5.7          | 6.8 |
| Median score                                          | 8.0          | 7.0          | 7.0          | 6.0          | 6.0          |     |
| MADM                                                  | 1.3          | 0.8          | 1.0          | 1.8          | 1.4          |     |
| Agreement                                             | Moderate     | High         | High         | Low          | Low          |     |
|                                                       | Consensus    | Consensus    | Consensus    | No consensus | No consensus |     |
| <b>113- Birth weight adjusted for gestational age</b> |              |              |              |              |              |     |
| <b>Round 1</b>                                        |              |              |              |              |              |     |
| Mean score                                            | N/A          | N/A          | N/A          | N/A          | N/A          | N/A |
| Median score                                          | N/A          | N/A          | N/A          | N/A          | N/A          |     |
| MADM                                                  | N/A          | N/A          | N/A          | N/A          | N/A          |     |
| Agreement                                             | N/A          | N/A          | N/A          | N/A          | N/A          |     |
|                                                       | N/A          | N/A          | N/A          | N/A          | N/A          |     |
| <b>Round 2</b>                                        |              |              |              |              |              |     |
| Mean score                                            | 6.4          | 5.3          | 5.9          | 6.4          | 6.1          | 6.0 |
| Median score                                          | 6.0          | 6.0          | 6.0          | 7.0          | 6.0          |     |
| MADM                                                  | 1.2          | 1.0          | 0.8          | 1.2          | 1.3          |     |
| Agreement                                             | Moderate     | High         | High         | Moderate     | Moderate     |     |
|                                                       | No consensus | No consensus | No consensus | No consensus | No consensus |     |

|                                                                |                  |                  |                  |              |              |     |
|----------------------------------------------------------------|------------------|------------------|------------------|--------------|--------------|-----|
| <b>Round 3</b>                                                 |                  |                  |                  |              |              |     |
| Mean score                                                     | 6.5              | 5.6              | <b>6.8</b>       | 6.4          | 5.9          | 6.2 |
| Median score                                                   | 7.0              | 6.0              | <b>7.0</b>       | 7.0          | 6.0          |     |
| MADM                                                           | 1.1              | 0.8              | <b>0.2</b>       | 1.0          | 1.3          |     |
| Agreement                                                      | Moderate         | High             | <b>High</b>      | High         | Moderate     |     |
|                                                                | No consensus     | No consensus     | <b>Consensus</b> | No consensus | No consensus |     |
| <b>114- Household Chaos</b>                                    |                  |                  |                  |              |              |     |
| <b>Round 1</b>                                                 |                  |                  |                  |              |              |     |
| Mean score                                                     | N/A              | N/A              | N/A              | N/A          | N/A          | N/A |
| Median score                                                   | N/A              | N/A              | N/A              | N/A          | N/A          |     |
| MADM                                                           | N/A              | N/A              | N/A              | N/A          | N/A          |     |
| Agreement                                                      | N/A              | N/A              | N/A              | N/A          | N/A          |     |
|                                                                | N/A              | N/A              | N/A              | N/A          | N/A          |     |
| <b>Round 2</b>                                                 |                  |                  |                  |              |              |     |
| Mean score                                                     | <b>7.2</b>       | <b>7.0</b>       | 6.1              | 6.4          | 6.4          | 6.6 |
| Median score                                                   | <b>7.0</b>       | <b>7.0</b>       | 6.0              | 6.5          | 6.5          |     |
| MADM                                                           | <b>0.9</b>       | <b>0.4</b>       | 1.3              | 1.8          | 1.4          |     |
| Agreement                                                      | <b>High</b>      | <b>High</b>      | Moderate         | Low          | Moderate     |     |
|                                                                | <b>Consensus</b> | <b>Consensus</b> | No consensus     | No consensus | No consensus |     |
| <b>Round 3</b>                                                 |                  |                  |                  |              |              |     |
| Mean score                                                     | <b>7.3</b>       | <b>7.2</b>       | 6.6              | 6.4          | 6.4          | 6.8 |
| Median score                                                   | <b>8.0</b>       | <b>7.0</b>       | 6.0              | 6.5          | 6.0          |     |
| MADM                                                           | <b>0.9</b>       | <b>0.2</b>       | 1.0              | 1.6          | 1.3          |     |
| Agreement                                                      | <b>High</b>      | <b>High</b>      | High             | Low          | Moderate     |     |
|                                                                | <b>Consensus</b> | <b>Consensus</b> | No consensus     | No consensus | No consensus |     |
| <b>115- Parent child child mutually responsive orientation</b> |                  |                  |                  |              |              |     |
| <b>Round 1</b>                                                 |                  |                  |                  |              |              |     |
| Mean score                                                     | N/A              | N/A              | N/A              | N/A          | N/A          | N/A |
| Median score                                                   | N/A              | N/A              | N/A              | N/A          | N/A          |     |

|                                                          |              |                  |                  |              |              |     |
|----------------------------------------------------------|--------------|------------------|------------------|--------------|--------------|-----|
| MADM                                                     | N/A          | N/A              | N/A              | N/A          | N/A          |     |
| Agreement                                                | N/A          | N/A              | N/A              | N/A          | N/A          |     |
|                                                          | N/A          | N/A              | N/A              | N/A          | N/A          |     |
| <b>Round 2</b>                                           |              |                  |                  |              |              |     |
| Mean score                                               | 7.2          | 7.1              | 5.8              | 5.5          | 5.5          | 6.2 |
| Median score                                             | 7.0          | 7.0              | 5.5              | 6.0          | 6.0          |     |
| MADM                                                     | 1.0          | 0.5              | 1.2              | 1.2          | 1.3          |     |
| Agreement                                                | High         | High             | Moderate         | Moderate     | Moderate     |     |
|                                                          | No consensus | No consensus     | No consensus     | No consensus | No consensus |     |
| <b>Round 3</b>                                           |              |                  |                  |              |              |     |
| Mean score                                               | 7.4          | <b>7.2</b>       | <b>6.8</b>       | 6.1          | 5.5          | 6.6 |
| Median score                                             | 8.0          | <b>7.0</b>       | <b>7.0</b>       | 6.0          | 5.0          |     |
| MADM                                                     | 0.9          | <b>0.2</b>       | <b>0.5</b>       | 1.0          | 1.3          |     |
| Agreement                                                | High         | <b>High</b>      | <b>High</b>      | High         | Moderate     |     |
|                                                          | No consensus | <b>Consensus</b> | <b>Consensus</b> | No consensus | No consensus |     |
| <b>116- Parent/caregiver body image and satisfaction</b> |              |                  |                  |              |              |     |
| <b>Round 1</b>                                           |              |                  |                  |              |              |     |
| Mean score                                               | N/A          | N/A              | N/A              | N/A          | N/A          | N/A |
| Median score                                             | N/A          | N/A              | N/A              | N/A          | N/A          |     |
| MADM                                                     | N/A          | N/A              | N/A              | N/A          | N/A          |     |
| Agreement                                                | N/A          | N/A              | N/A              | N/A          | N/A          |     |
|                                                          | N/A          | N/A              | N/A              | N/A          | N/A          |     |
| <b>Round 2</b>                                           |              |                  |                  |              |              |     |
| Mean score                                               | 6.7          | <b>7.1</b>       | 6.4              | 5.5          | 5.8          | 6.3 |
| Median score                                             | 7.0          | <b>7.0</b>       | 7.0              | 6.0          | 6.0          |     |
| MADM                                                     | 0.7          | <b>0.6</b>       | 1.0              | 1.0          | 1.1          |     |
| Agreement                                                | High         | <b>High</b>      | High             | High         | Moderate     |     |
|                                                          | No consensus | <b>Consensus</b> | No consensus     | No consensus | No consensus |     |
| <b>Round 3</b>                                           |              |                  |                  |              |              |     |

|                                |              |                  |                  |              |              |     |
|--------------------------------|--------------|------------------|------------------|--------------|--------------|-----|
| Mean score                     | 6.7          | <b>7.6</b>       | 6.8              | 5.6          | 5.8          | 6.5 |
| Median score                   | 7.0          | <b>8.0</b>       | 7.0              | 6.0          | 6.0          |     |
| MADM                           | 0.9          | <b>0.4</b>       | 0.6              | 0.9          | 1.2          |     |
| Agreement                      | High         | <b>High</b>      | High             | High         | Moderate     |     |
|                                | No consensus | <b>Consensus</b> | No consensus     | No consensus | No consensus |     |
| <b>117- Child self esteem</b>  |              |                  |                  |              |              |     |
| <b>Round 1</b>                 |              |                  |                  |              |              |     |
| Mean score                     | N/A          | N/A              | N/A              | N/A          | N/A          | N/A |
| Median score                   | N/A          | N/A              | N/A              | N/A          | N/A          |     |
| MADM                           | N/A          | N/A              | N/A              | N/A          | N/A          |     |
| Agreement                      | N/A          | N/A              | N/A              | N/A          | N/A          |     |
|                                | N/A          | N/A              | N/A              | N/A          | N/A          |     |
| <b>Round 2</b>                 |              |                  |                  |              |              |     |
| Mean score                     | 7.0          | <b>7.2</b>       | <b>7.2</b>       | 6.2          | 6.1          | 6.7 |
| Median score                   | 7.0          | <b>7.0</b>       | <b>8.0</b>       | 6.0          | 6.0          |     |
| MADM                           | 1.0          | <b>0.7</b>       | <b>1.2</b>       | 1.5          | 1.3          |     |
| Agreement                      | High         | <b>High</b>      | <b>Moderate</b>  | Low          | Moderate     |     |
|                                | No consensus | <b>Consensus</b> | <b>Consensus</b> | No consensus | No consensus |     |
| <b>Round 3</b>                 |              |                  |                  |              |              |     |
| Mean score                     | 6.5          | <b>7.5</b>       | <b>8.0</b>       | 6.6          | 5.9          | 6.9 |
| Median score                   | 7.0          | <b>7.5</b>       | <b>8.0</b>       | 7.0          | 6.0          |     |
| MADM                           | 1.3          | <b>0.8</b>       | <b>0.3</b>       | 1.6          | 1.1          |     |
| Agreement                      | Moderate     | <b>High</b>      | <b>High</b>      | Low          | Moderate     |     |
|                                | No consensus | <b>Consensus</b> | <b>Consensus</b> | No consensus | No consensus |     |
| <b>119- Child fruit intake</b> |              |                  |                  |              |              |     |
| <b>Round 1</b>                 |              |                  |                  |              |              |     |
| Mean score                     | N/A          | N/A              | N/A              | N/A          | N/A          | N/A |
| Median score                   | N/A          | N/A              | N/A              | N/A          | N/A          |     |
| MADM                           | N/A          | N/A              | N/A              | N/A          | N/A          |     |

|                                    |                  |                  |                  |              |              |     |
|------------------------------------|------------------|------------------|------------------|--------------|--------------|-----|
| Agreement                          | N/A              | N/A              | N/A              | N/A          | N/A          |     |
|                                    | N/A              | N/A              | N/A              | N/A          | N/A          |     |
| <b>Round 2</b>                     |                  |                  |                  |              |              |     |
| Mean score                         | 6.6              | <b>7.4</b>       | <b>7.2</b>       | 7.4          | 6.7          | 7.1 |
| Median score                       | 6.5              | <b>7.0</b>       | <b>7.0</b>       | 7.0          | 7.0          |     |
| MADM                               | 1.2              | <b>0.4</b>       | <b>0.8</b>       | 0.9          | 1.1          |     |
| Agreement                          | Moderate         | <b>High</b>      | <b>High</b>      | High         | Moderate     |     |
|                                    | No consensus     | <b>Consensus</b> | <b>Consensus</b> | No consensus | No consensus |     |
| <b>Round 3</b>                     |                  |                  |                  |              |              |     |
| Mean score                         | 6.8              | <b>7.5</b>       | <b>8.0</b>       | 7.3          | 6.6          | 7.2 |
| Median score                       | 7.0              | <b>7.0</b>       | <b>8.0</b>       | 7.0          | 7.0          |     |
| MADM                               | 0.7              | <b>0.5</b>       | <b>0.7</b>       | 1.0          | 1.1          |     |
| Agreement                          | High             | <b>High</b>      | <b>High</b>      | High         | Moderate     |     |
|                                    | No consensus     | <b>Consensus</b> | <b>Consensus</b> | No consensus | No consensus |     |
| <b>120- Child vegetable intake</b> |                  |                  |                  |              |              |     |
| <b>Round 1</b>                     |                  |                  |                  |              |              |     |
| Mean score                         | N/A              | N/A              | N/A              | N/A          | N/A          | N/A |
| Median score                       | N/A              | N/A              | N/A              | N/A          | N/A          |     |
| MADM                               | N/A              | N/A              | N/A              | N/A          | N/A          |     |
| Agreement                          | N/A              | N/A              | N/A              | N/A          | N/A          |     |
|                                    | N/A              | N/A              | N/A              | N/A          | N/A          |     |
| <b>Round 2</b>                     |                  |                  |                  |              |              |     |
| Mean score                         | <b>7.72</b>      | <b>8.00</b>      | <b>8.00</b>      | 7.77         | 7.14         | 7.7 |
| Median score                       | <b>8.00</b>      | <b>8.00</b>      | <b>8.00</b>      | 9.00         | 7.00         |     |
| MADM                               | <b>1.10</b>      | <b>0.80</b>      | <b>0.80</b>      | 1.23         | 0.98         |     |
| Agreement                          | <b>Moderate</b>  | <b>High</b>      | <b>High</b>      | Moderate     | High         |     |
|                                    | <b>Consensus</b> | <b>Consensus</b> | <b>Consensus</b> | No consensus | No consensus |     |
| <b>Round 3</b>                     |                  |                  |                  |              |              |     |
| Mean score                         | <b>7.9</b>       | <b>8.3</b>       | <b>8.2</b>       | <b>7.9</b>   | 7.1          | 7.9 |

|              |                  |                  |                  |                  |              |  |
|--------------|------------------|------------------|------------------|------------------|--------------|--|
| Median score | <b>8.0</b>       | <b>8.5</b>       | <b>8.0</b>       | <b>9.0</b>       | 7.0          |  |
| MADM         | <b>0.8</b>       | <b>0.7</b>       | <b>0.5</b>       | <b>1.1</b>       | 1.1          |  |
| Agreement    | <b>High</b>      | <b>High</b>      | <b>High</b>      | <b>Moderate</b>  | Moderate     |  |
|              | <b>Consensus</b> | <b>Consensus</b> | <b>Consensus</b> | <b>Consensus</b> | No consensus |  |



**Supplementary Table S5 - Percentage of stakeholders who scored the outcome as critical (score of 7–9) for inclusion, Round 3 of the eDelphi survey**

| <b>Outcome</b>                                            | <b>Health professionals (%)</b> | <b>Community or organisational (%)</b> | <b>Parents/caregivers (%)</b> | <b>Policy-makers/funders (%)</b> | <b>Researchers (%)</b> |
|-----------------------------------------------------------|---------------------------------|----------------------------------------|-------------------------------|----------------------------------|------------------------|
| Child weight based anthropometry                          | 93                              | 86                                     | 67                            | 90                               | 90                     |
| Child body composition                                    | 60                              | 57                                     | 50                            | 60                               | 73                     |
| Child circumference                                       | 53                              | 29                                     | 50                            | 50                               | 61                     |
| Child screen time                                         | 80                              | 100                                    | 83                            | 90                               | 82                     |
| Sedentary behaviour or physical activity home environment | 76                              | 100                                    | 100                           | 80                               | 78                     |
| Child time spent sedentary                                | 94                              | 100                                    | 100                           | 100                              | 86                     |
| Child active transport                                    | 67                              | 83                                     | 67                            | 60                               | 59                     |
| Child physical fitness                                    | 67                              | 83                                     | 83                            | 70                               | 51                     |
| Child active indoor play                                  | 47                              | 83                                     | 83                            | 60                               | 55                     |
| Child active outdoor play                                 | 73                              | 100                                    | 100                           | 60                               | 80                     |
| Child physical activity                                   | 87                              | 100                                    | 100                           | 90                               | 96                     |
| Infant tummy time                                         | 60                              | 67                                     | 83                            | 50                               | 49                     |
| Infant floor based play time                              | 67                              | 83                                     | 100                           | 40                               | 47                     |
| Child enjoyment of physical activity and playing          | 80                              | 100                                    | 83                            | 60                               | 45                     |
| Child sleep duration                                      | 63                              | 67                                     | 100                           | 60                               | 69                     |
| Child sleep disturbance or problems                       | 69                              | 67                                     | 50                            | 40                               | 43                     |
| Child sleep efficiency                                    | 44                              | 50                                     | 83                            | 40                               | 31                     |
| Child sleep latency                                       | 31                              | 50                                     | 50                            | 20                               | 18                     |
| Child sleep patterns or timing                            | 69                              | 33                                     | 50                            | 40                               | 53                     |
| Child sleep quality                                       | 81                              | 83                                     | 67                            | 60                               | 61                     |
| Child carbohydrate intake or glycemic load                | 53                              | 67                                     | 33                            | 30                               | 18                     |
| Child dairy intake                                        | 60                              | 67                                     | 33                            | 40                               | 16                     |
| Child diet quality                                        | 100                             | 100                                    | 100                           | 100                              | 92                     |

|                                                         |     |     |     |     |    |
|---------------------------------------------------------|-----|-----|-----|-----|----|
| Child dietary intake                                    | 100 | 100 | 100 | 100 | 88 |
| Child fat intake                                        | 40  | 83  | 50  | 60  | 31 |
| Child fibre intake                                      | 67  | 83  | 50  | 30  | 33 |
| Child fruit and vegetable intake                        | 93  | 100 | 100 | 70  | 86 |
| Child grains; breads; cereals intake                    | 47  | 83  | 50  | 50  | 29 |
| Child meat; poultry; fish intake                        | 33  | 67  | 50  | 60  | 18 |
| Child non-core food intake                              | 87  | 67  | 83  | 80  | 69 |
| Child non-core beverages intake                         | 93  | 83  | 83  | 90  | 84 |
| Child out of home foods intake                          | 80  | 83  | 67  | 90  | 55 |
| Child protein intake                                    | 53  | 67  | 67  | 30  | 22 |
| Child sodium intake                                     | 53  | 83  | 33  | 60  | 24 |
| Child total and added sugars intake                     | 100 | 67  | 100 | 80  | 69 |
| Child desire for drinks                                 | 60  | 83  | 50  | 30  | 31 |
| Child eating in response to emotion                     | 80  | 83  | 67  | 70  | 41 |
| Child enjoyment of food                                 | 47  | 100 | 67  | 70  | 31 |
| Child meal patterns                                     | 80  | 83  | 83  | 80  | 65 |
| Child food neophobia                                    | 67  | 83  | 50  | 30  | 27 |
| Child satiety responsiveness                            | 80  | 83  | 83  | 70  | 47 |
| Child slowness in eating                                | 20  | 67  | 17  | 30  | 14 |
| Parent/caregiver weight based anthropometry             | 69  | 83  | 60  | 50  | 68 |
| Parent/caregiver screen time parenting practice         | 69  | 86  | 100 | 60  | 68 |
| Parent/caregiver role modelling of sedentary behaviours | 88  | 100 | 100 | 50  | 64 |
| Parent/caregiver role modelling of physical activity    | 94  | 100 | 100 | 70  | 82 |
| Parent/caregiver role modelling of healthy eating       | 100 | 100 | 100 | 80  | 86 |
| Parent/caregiver encouragement of physical activity     | 94  | 100 | 80  | 70  | 76 |
| Parent/caregiver co-participation in physical activity  | 87  | 100 | 80  | 70  | 66 |

|                                                                       |    |     |     |    |    |
|-----------------------------------------------------------------------|----|-----|-----|----|----|
| Parent/caregiver physical activity parenting practice                 | 75 | 100 | 100 | 70 | 56 |
| Parent/caregiver sleep parenting practice                             | 60 | 71  | 60  | 40 | 42 |
| Parent/caregiver daytime dysfunction or fatigue                       | 60 | 71  | 60  | 20 | 18 |
| Parent/caregiver nutrition parenting practices                        | 93 | 86  | 80  | 60 | 68 |
| Parent/caregiver's dietary intentions                                 | 67 | 71  | 60  | 60 | 32 |
| Parent/caregiver food variety                                         | 73 | 100 | 60  | 60 | 56 |
| Parent/caregiver anxiety symptoms                                     | 67 | 71  | 60  | 50 | 36 |
| Parent/caregiver concerns about child's weight                        | 53 | 86  | 40  | 60 | 58 |
| Parent/caregiver depression symptoms                                  | 67 | 71  | 40  | 30 | 53 |
| Parent/caregiver self-efficacy                                        | 67 | 86  | 60  | 50 | 61 |
| Parent/caregiver social support                                       | 53 | 71  | 80  | 70 | 57 |
| Parent/caregiver stress                                               | 67 | 50  | 60  | 50 | 55 |
| Parent/caregiver attitudes                                            | 87 | 100 | 60  | 60 | 47 |
| Parent/caregiver awareness of behaviours                              | 87 | 100 | 60  | 50 | 45 |
| Parent/caregiver beliefs                                              | 87 | 83  | 80  | 50 | 39 |
| Parent/caregiver health literacy                                      | 87 | 100 | 80  | 70 | 65 |
| Parent/caregiver knowledge                                            | 87 | 100 | 60  | 60 | 31 |
| Parent/caregiver readiness to change                                  | 80 | 100 | 60  | 60 | 49 |
| Parenting style                                                       | 87 | 100 | 40  | 60 | 41 |
| Parent/caregiver responsiveness                                       | 87 | 83  | 60  | 50 | 47 |
| Family functioning                                                    | 73 | 83  | 60  | 70 | 47 |
| Parent/caregiver perception of child weight                           | 73 | 83  | 60  | 70 | 61 |
| Perception of parent/caregiver influence on child's health behaviours | 87 | 100 | 60  | 60 | 53 |
| Parent/caregiver perceptions of adequacy of resources and barriers    | 87 | 100 | 60  | 90 | 57 |
| Parent/caregiver feeding control                                      | 88 | 86  | 17  | 70 | 59 |
| Parent/caregiver emotional feeding                                    | 87 | 86  | 17  | 60 | 51 |

|                                                       |    |     |     |    |    |
|-------------------------------------------------------|----|-----|-----|----|----|
| Parent/caregiver feeding encouragement                | 60 | 86  | 50  | 70 | 55 |
| Parent/caregiver feeding interaction                  | 80 | 100 | 50  | 70 | 55 |
| Parent/caregiver feeding structure                    | 67 | 100 | 33  | 60 | 47 |
| Parent/caregiver feeding style                        | 67 | 100 | 50  | 70 | 53 |
| Parent/caregiver using food as a reward               | 93 | 86  | 50  | 70 | 69 |
| Parent/caregiver frequency of bottle use              | 80 | 57  | 17  | 70 | 35 |
| Parent/caregiver promoting autonomy                   | 73 | 86  | 83  | 60 | 59 |
| Parent/caregiver that is responsible for feeding      | 80 | 86  | 50  | 60 | 37 |
| Food environment                                      | 88 | 100 | 100 | 90 | 92 |
| Household food security                               | 93 | 100 | 100 | 90 | 90 |
| Family meal environment                               | 88 | 100 | 100 | 70 | 88 |
| Early childhood education and care (ECEC) environment | 69 | 100 | 83  | 90 | 69 |
| Healthcare environment                                | 38 | 83  | 67  | 50 | 27 |
| Child internalising and/or externalising behaviours   | 47 | 67  | 50  | 10 | 20 |
| Child emotion regulation                              | 67 | 67  | 67  | 40 | 31 |
| Child emotional development                           | 53 | 67  | 83  | 30 | 22 |
| Child school readiness                                | 27 | 17  | 50  | 30 | 20 |
| Child wellbeing                                       | 87 | 83  | 100 | 90 | 65 |
| Child attention control                               | 53 | 33  | 33  | 20 | 10 |
| Child cognitive development                           | 47 | 67  | 50  | 30 | 20 |
| Child executive function                              | 33 | 67  | 67  | 20 | 24 |
| Child self-regulation                                 | 60 | 83  | 33  | 60 | 51 |
| Child fundamental movement skills                     | 40 | 86  | 80  | 40 | 33 |
| Child activity preference or perception               | 60 | 71  | 67  | 60 | 35 |
| Child food preference                                 | 67 | 57  | 33  | 40 | 35 |
| Child blood pressure                                  | 13 | 50  | 33  | 10 | 18 |
| Child cholesterol                                     | 25 | 67  | 17  | 10 | 20 |
| Child glucose                                         | 38 | 67  | 50  | 10 | 31 |

|                                                    |    |     |     |    |    |
|----------------------------------------------------|----|-----|-----|----|----|
| Child hemoglobin                                   | 40 | 50  | 17  | 30 | 14 |
| Child lipids                                       | 20 | 33  | 17  | 10 | 27 |
| Child metabolic and inflammatory parameters        | 33 | 33  | 33  | 10 | 22 |
| Child health-related quality of life               | 93 | 100 | 83  | 60 | 70 |
| Economic evaluation                                | 73 | 71  | 33  | 73 | 71 |
| Child healthcare utilisation                       | 63 | 43  | 33  | 27 | 65 |
| Intervention cost                                  | 81 | 71  | 67  | 80 | 81 |
| Child oral hygiene                                 | 67 | 100 | 80  | 40 | 39 |
| Child dental caries                                | 87 | 83  | 80  | 40 | 56 |
| Birth weight adjusted for gestational age          | 60 | 17  | 80  | 60 | 57 |
| Household Chaos                                    | 75 | 100 | 33  | 40 | 62 |
| Parent child child mutually responsive orientation | 60 | 100 | 83  | 43 | 49 |
| Parent/caregiver body image and satisfaction       | 73 | 83  | 60  | 20 | 52 |
| Child self-esteem                                  | 60 | 83  | 100 | 50 | 62 |
| Child fruit intake                                 | 60 | 100 | 83  | 70 | 69 |
| Child vegetable intake                             | 93 | 100 | 100 | 80 | 71 |

## Supplementary Figure S1 – Example of graphical feedback given to participants between rounds

### Child weight based anthropometry

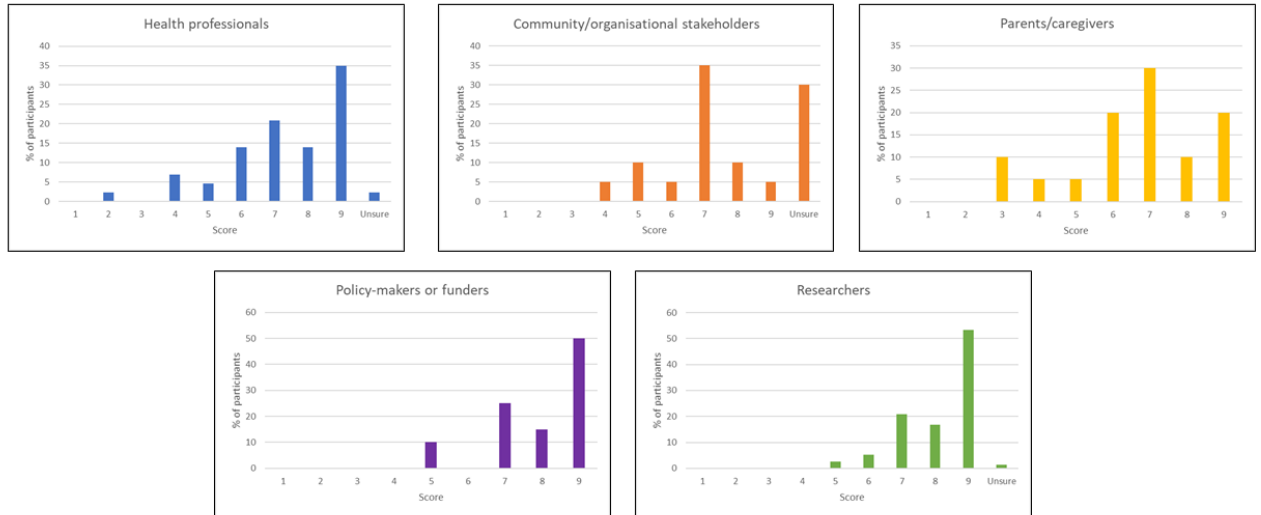

### Supplementary Figure S2 - Distribution of scores across all outcomes

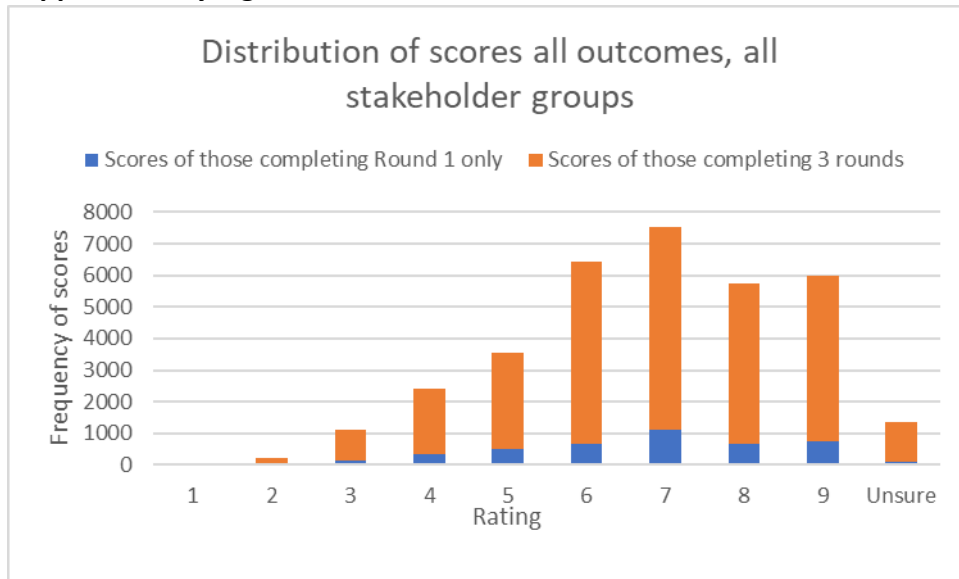

Figure notes: Blue bars represent those participants who scored only in Round 1, orange bars represent those participants who scored in all rounds

## REFERENCES

1. Kirkham JJ, Gorst S, Altman DG, Blazeby JM, Clarke M, Devane D, et al. Core Outcome Set–STAndards for Reporting: The COS-STAR Statement. *PLoS Med.* 2016;13(10):e1002148.
2. Jünger S, Payne SA, Brine J, Radbruch L, Brearley SG. Guidance on Conducting and REporting DElphi Studies (CREDES) in palliative care: Recommendations based on a methodological systematic review. *Palliat Med.* 2017;31(8):684-706.
